# Supplementary material for: Copper-catalyzed intramolecular iminolactonization cyclization reactions of remote C(sp3)–H bonds in carboxamides
Source: Royal Society of Chemistry journal article supplement (doi:10.1039/d2ob01711c), 2022-01-01

## Electronic Supplementary Information

### Copper-Catalyzed Intramolecular Iminolactonization Cyclization Reactions of Remote C(sp<sup>3</sup>)-H Bonds in Carboxamides

He Wei, Zhenhua Zhang,\* Xiang Zhang, Shuo Gao, Tongtong Wang, Mengmeng Zhao,  
Pifeng Wei\* and Min Wang\*

School of Chemistry and Chemical Engineering, Linyi University, Linyi 276000, China.

E-mail: zhangzhenhua@iccas.ac.cn

## Table of Contents

|                                                                                                                                            |     |
|--------------------------------------------------------------------------------------------------------------------------------------------|-----|
| <u>General information</u> .....                                                                                                           | S2  |
| <u>Unsuccessful substrates</u> .....                                                                                                       | S2  |
| <u>Optimization of the reaction conditions:</u> .....                                                                                      | S3  |
| <u>General procedure for the synthesis of substrates:</u> .....                                                                            | S5  |
| <u>Copper-catalyzed intramolecular iminolactonization cyclization reactions of remote C(sp<sup>3</sup>)-H bonds in carboxamides:</u> ..... | S14 |
| <u>Mechanistic study</u> .....                                                                                                             | S22 |
| <u>Lactamization of <i>N</i>-alkoxycarboxamides</u> .....                                                                                  | S25 |
| <u>Supplementary references:</u> .....                                                                                                     | S27 |
| <u>NMR spectra</u> .....                                                                                                                   | S29 |

## General information

Most of reactions were carried out under argon atmosphere using Schlenk techniques. Reagents were purchased at the highest commercial quality and used without further purification, unless otherwise stated. CuI was purchased from Sigma-Aldrich. Analytical thin layer chromatography (TLC) was performed on precoated silica gel 60 GF254 plates. Flash column chromatography was performed using Tsingdao silica gel (60, particle size 0.040–0.063 mm). Visualization on TLC was achieved by use of UV light (254 nm) or iodine. NMR spectra were recorded on Bruker DRX-400 at 400 MHz for  $^1\text{H}$  NMR, 101 MHz for  $^{13}\text{C}$  NMR and 376 MHz for  $^{19}\text{F}$  NMR, respectively, in  $\text{CDCl}_3$  with tetramethylsilane (TMS) as internal standard. The chemical shifts are expressed in ppm and coupling constants are given in Hz. Data for  $^1\text{H}$  NMR are recorded as follows: chemical shift (ppm), multiplicity (s, singlet; d, doublet; t, triplet; q, quarter; p, pentet, m, multiplet; br, broad), coupling constant (Hz), integration. Data for  $^{13}\text{C}$  NMR are reported in terms of chemical shift ( $\delta$ , ppm). Mass spectrometric data were obtained using Bruker Apex IV RTMS.

## Unsuccessful substrates

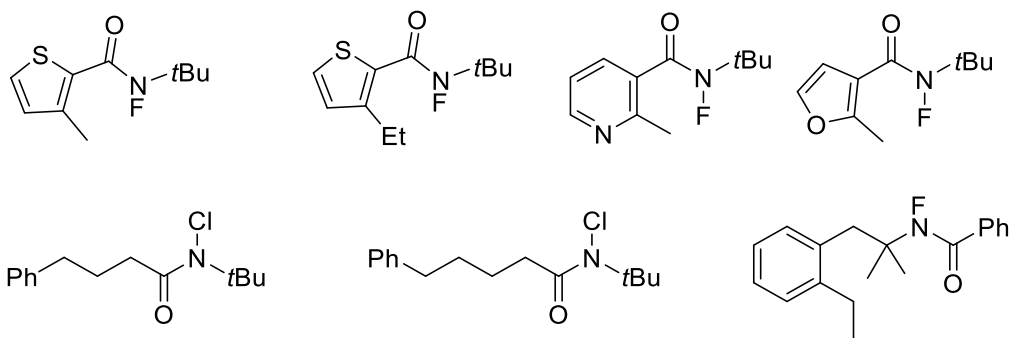

## Optimization of the reaction conditions

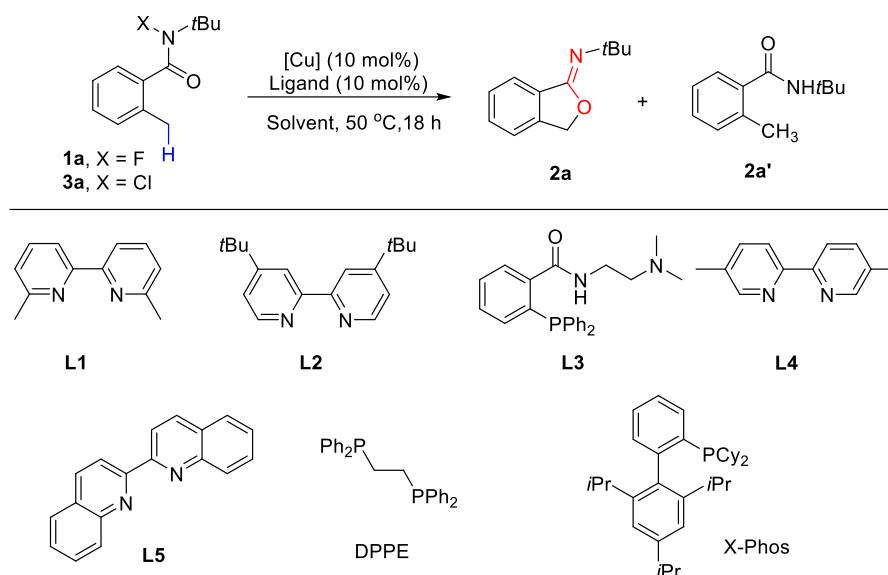

**Table S1: Screen of the ligand<sup>a,b</sup>**

| entry           | [Cu] | Ligand           | solvent | <b>2a</b> | <b>2a'</b> |
|-----------------|------|------------------|---------|-----------|------------|
| 1               | CuBr | Phen             | THF     | 56        | 23         |
| 2               | CuBr | bpy              | THF     | 68        | 13         |
| 3               | CuBr | L1               | THF     | 63        | 15         |
| 4               | CuBr | L2               | THF     | 59        | 18         |
| 5               | CuBr | L3               | THF     | 60        | 12         |
| 6               | CuBr | L4               | THF     | 61        | 18         |
| 7               | CuBr | L5               | THF     | 45        | 27         |
| 8               | CuBr | PPh <sub>3</sub> | THF     | 26        | 15         |
| 9               | CuBr | DPPE             | THF     | 39        | 20         |
| 10              | CuBr | X-Phos           | THF     | 36        | 11         |
| 11 <sup>c</sup> | CuBr | bpy              | THF     | 56        | 37         |

<sup>a</sup>Reaction conditions: **1a** (0.2 mmol), CuBr (10 mol%), and Ligand (10 mol%) in dry THF (1.0 mL) under

Ar at 50 °C for 18 h. <sup>b</sup>Isolated yield based on **1a**. <sup>c</sup>*N*-chlorocarboxamide **3a** was used.

**Table S2: Screen of the catalysts<sup>a,b</sup>**

| entry | [Cu]                   | Ligand | solvent | <b>2a</b> | <b>2a'</b> |
|-------|------------------------|--------|---------|-----------|------------|
| 1     | CuBr                   | bpy    | THF     | 68        | 13         |
| 2     | CuI                    | bpy    | THF     | 79        | <10        |
| 3     | CuTc                   | bpy    | THF     | 72        | <10        |
| 4     | CuOAc                  | bpy    | THF     | 58        | 14         |
| 5     | CuBr·Me <sub>2</sub> S | bpy    | THF     | 72        | <10        |
| 6     | CuCl                   | bpy    | THF     | 61        | 13         |
| 7     | Cu(OTf) <sub>2</sub>   | bpy    | THF     | 45        | <10        |
| 8     | Cu <sub>2</sub> O      | bpy    | THF     | Trace     | Trace      |
| 9     | AgCl                   | bpy    | THF     | Trace     | Trace      |
| 10    | AuCl                   | bpy    | THF     | 15        | <10        |
| 11    | PdCl <sub>2</sub>      | bpy    | THF     | 25        | <10        |

|                   |                                                    |     |     |       |       |
|-------------------|----------------------------------------------------|-----|-----|-------|-------|
| 12                | NiCl <sub>2</sub>                                  | bpy | THF | 38    | 18    |
| 13                | Ni(PPh <sub>3</sub> ) <sub>2</sub> Cl <sub>2</sub> | --  | THF | 45    | 20    |
| 14                | Fe(OTf) <sub>2</sub>                               | bpy | THF | Trace | Trace |
| 15 <sup>c</sup>   | CuI                                                | bpy | THF | 62    | 29    |
| 16 <sup>c,d</sup> | CuBr·Me <sub>2</sub> S                             | bpy | THF | 73    | 21    |

<sup>a</sup>Reaction conditions: **1a** (0.2 mmol), [catalyst] (10 mol%), and bpy (10 mol%) in dry THF (1.0 mL) under

Ar at 50 °C for 18 h. <sup>b</sup>Isolated yield based on **1a**. <sup>c</sup>*N*-chlorocarboxamide **3a** was used. <sup>d</sup>At 30 °C for 18 h.

**Table S3: Screen of the solvents** <sup>a,b</sup>

| entry | [Cu] | Ligand | solvent           | <b>2a</b> | <b>2a'</b> |
|-------|------|--------|-------------------|-----------|------------|
| 1     | CuI  | bpy    | toluene           | 64        | 19         |
| 2     | CuI  | bpy    | DME               | 73        | 11         |
| 3     | CuI  | bpy    | DCE               | 48        | 35         |
| 4     | CuI  | bpy    | PhCF <sub>3</sub> | 72        | <10        |
| 5     | CuI  | bpy    | THF               | 79        | <10        |
| 6     | CuI  | bpy    | 1,4-dioxane       | 65        | 24         |
| 7     | CuI  | bpy    | H <sub>2</sub> O  | Trace     | Trace      |
| 8     | CuI  | bpy    | DMF               | 61        | <10        |
| 9     | CuI  | bpy    | Et <sub>2</sub> O | 69        | <10        |
| 10    | CuI  | bpy    | DMSO              | 54        | 12         |
| 11    | CuI  | bpy    | DMA               | 37        | <10        |

<sup>a</sup>Reaction conditions: **1a** (0.2 mmol), CuI (10 mol%), and bpy (10 mol%) in dry solvent

(1.0 mL) under Ar at 50 °C for 18 h. <sup>b</sup>Isolated yield based on **1a**.

## General procedure for the synthesis of substrates:

### General procedure for the synthesis of *N*-fluorocarboxamides.

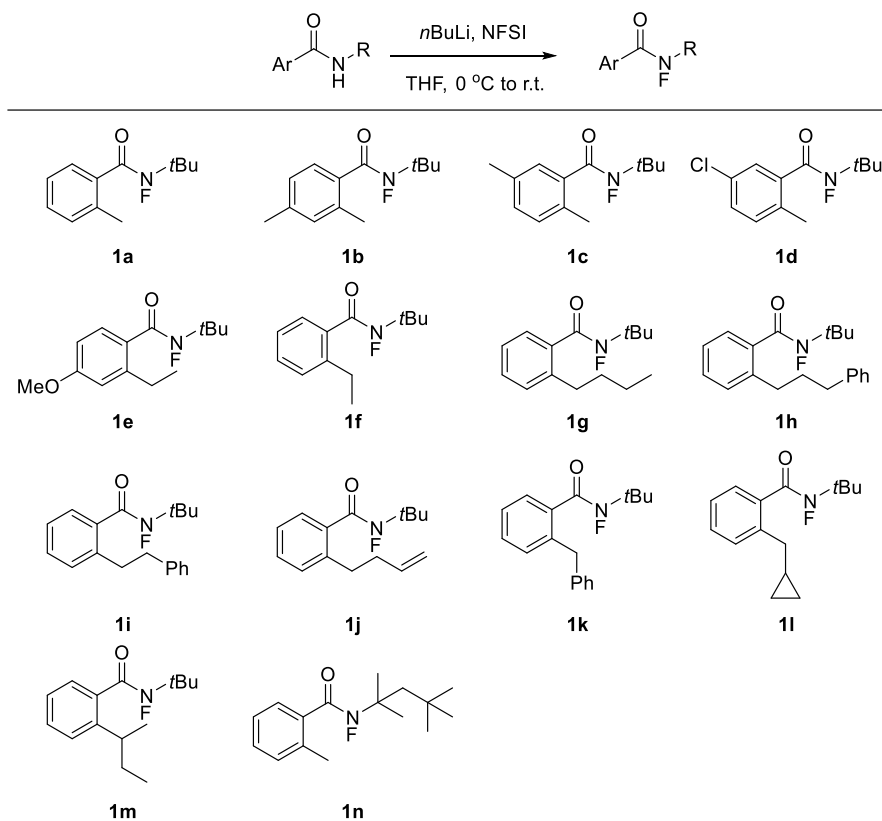

All the *N*-fluorocarboxamides were prepared by *N*-fluorination of their parent carboxamides according to conventional methods.<sup>1,2</sup> To a flame-dried round-bottom flask with a stir bar was added amide (1.0 equiv.). The contents were evacuated and backfilled three times with argon. Anhydrous THF (0.13 M) was added and the stirred solution was cooled on an ice bath for 15 min. *n*-Butyllithium (1.1 equiv., 2.4 M in hexanes) was added dropwise. The reaction was maintained at 0 °C for 1.5 h. NFSI (1.5 equiv., 0.6 M in THF) was added dropwise. The reaction was left overnight in the ice bath and allowed to warm to rt. After 10 to 14 h, the reaction was quenched with 1 M aqueous HCl and transferred to a separatory funnel. The crude mixture was diluted with DCM (0.1 M) and water (0.1 M). The organic layer was removed, and the aqueous layer was extracted with DCM. The combined organic layers were washed with saturated aqueous NaHCO<sub>3</sub> and then brine, dried with MgSO<sub>4</sub>, filtered, and concentrated by

rotary evaporation. The residue thus obtained was purified by silica gel column chromatography (15% EtOAc in hexanes) to afford pure fluoroamides.

### General procedures for the synthesis of *N*-chlorocarboxamides

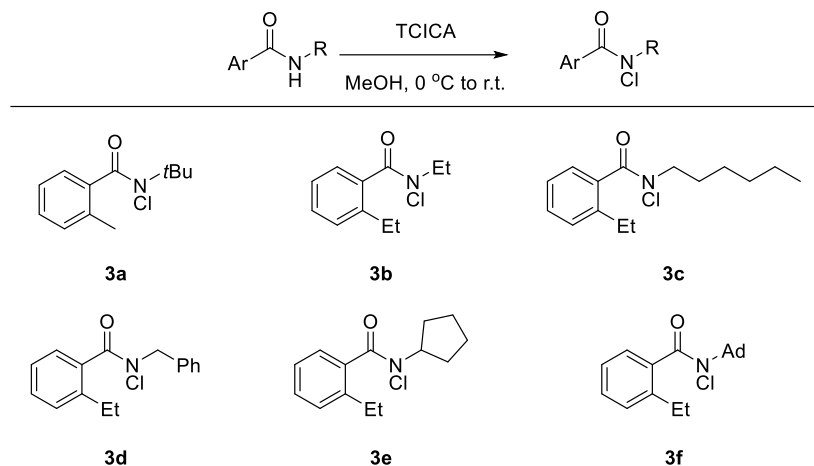

All the *N*-chlorocarboxamides were prepared by *N*-chlorination of their parent carboxamides according to conventional methods.<sup>1</sup> A 50 mL foil-wrapped round bottom flask equipped with a stir bar was charged with the corresponding amide (1 equiv.). Methanol (0.33M) was then added and the resulting solution was cooled to 0 °C in an ice bath. Trichloroisocyanuric acid (0.5 equiv.) was then added in one portion and the reaction mixture was stirred at room temperature. When the reaction was complete as judged by TLC analysis (typically within 0.5 to 3 hours, note: the formed *N*-chloroamide is much less polar than the starting amide), the reaction mixture was passed through a short pad of celite and was washed with DCM (30 mL × 3). The filtrate was then concentrated under reduced pressure, and the crude product was purified by silica gel column chromatography (hexanes and ethyl acetate) to afford the *N*-chlorocarboxamides.

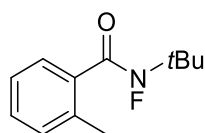

### *N*-(*tert*-butyl)-*N*-fluoro-2-methylbenzamide (**1a**)<sup>1</sup>

Yellow oil, 585 mg (28% yield, 10.0 mmol scale). <sup>1</sup>H NMR (400 MHz, CDCl<sub>3</sub>) δ 7.37-7.27 (m, 2H), 7.24-7.17 (m, 2H), 2.41 (s, 3H), 1.56 (d, *J* = 2.2 Hz, 9H); <sup>13</sup>C NMR (101 MHz, CDCl<sub>3</sub>) δ 175.1 (d, *J* = 10.8 Hz), 135.4 (d, *J* = 2.4 Hz), 135.1, 130.5, 130.0 (d, *J*

= 1.4 Hz), 127.2 (d,  $J = 4.4$  Hz), 125.4, 64.4 (d,  $J = 10.5$  Hz), 27.2 (d,  $J = 5.7$  Hz), 19.4;  
 $^{19}\text{F}$  NMR (376 MHz,  $\text{CDCl}_3$ )  $\delta$  -64.67.

HRMS (ESI)  $m/z$  calcd. for  $\text{C}_{12}\text{H}_{17}\text{FNO}$   $[\text{M}+\text{H}]^+$  210.1289, found 210.1287.

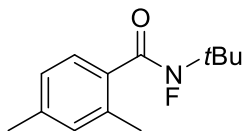

***N*-(*tert*-butyl)-*N*-fluoro-2,4-dimethylbenzamide (1b)<sup>1</sup>**

Yellow oil, 691 mg (31% yield, 10.0 mmol scale).  $^1\text{H}$  NMR (400 MHz,  $\text{CDCl}_3$ )  $\delta$  7.24 (d,  $J = 7.7$  Hz, 1H), 7.09-6.95 (m, 2H), 2.37 (s, 3H), 2.32 (s, 3H), 1.53 (d,  $J = 2.0$  Hz, 9H);  $^{13}\text{C}$  NMR (101 MHz,  $\text{CDCl}_3$ )  $\delta$  175.5 (d,  $J = 10.4$  Hz), 140.3, 135.7 (d,  $J = 2.3$  Hz), 132.3, 131.4, 127.6 (d,  $J = 4.6$  Hz), 126.1, 64.4 (d,  $J = 10.6$  Hz), 27.3 (d,  $J = 5.8$  Hz), 21.4, 19.5.;  $^{19}\text{F}$  NMR (376 MHz,  $\text{CDCl}_3$ )  $\delta$  -64.02.

HRMS (ESI)  $m/z$  calcd. for  $\text{C}_{13}\text{H}_{19}\text{FNO}$   $[\text{M}+\text{H}]^+$  224.1445, found 224.1442.

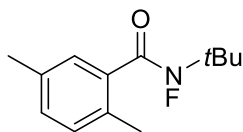

***N*-(*tert*-butyl)-*N*-fluoro-2,5-dimethylbenzamide (1c)<sup>3</sup>**

Yellow oil, 846 mg (38% yield, 10.0 mmol scale).  $^1\text{H}$  NMR (400 MHz,  $\text{CDCl}_3$ )  $\delta$  7.13 (s, 1H), 7.12-7.07 (m, 2H), 2.35 (s, 3H), 2.32 (s, 3H), 1.55 (d,  $J = 1.9$  Hz, 9H);  $^{13}\text{C}$  NMR (101 MHz,  $\text{CDCl}_3$ )  $\delta$  175.2 (d,  $J = 10.8$  Hz), 134.9, 132.1 (d,  $J = 2.4$  Hz), 130.7, 130.3, 127.5 (d,  $J = 4.2$  Hz), 64.3 (d,  $J = 10.5$  Hz), 27.2 (d,  $J = 5.7$  Hz), 20.8, 18.8;  $^{19}\text{F}$  NMR (376 MHz,  $\text{CDCl}_3$ )  $\delta$  -64.82.

HRMS (ESI)  $m/z$  calcd. for  $\text{C}_{13}\text{H}_{19}\text{FNO}$   $[\text{M}+\text{H}]^+$  224.1445, found 224.1442.

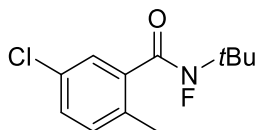

***N*-(*tert*-butyl)-5-chloro-*N*-fluoro-2-methylbenzamide (1d)<sup>3</sup>**

Yellow oil, 772 mg (32% yield, 10.0 mmol scale).  $^1\text{H}$  NMR (400 MHz,  $\text{CDCl}_3$ )  $\delta$  7.31-7.25 (m, 2H), 7.14 (d,  $J = 8.2$  Hz, 1H), 2.35 (s, 3H), 1.55 (d,  $J = 2.0$  Hz, 9H);  $^{13}\text{C}$  NMR (101 MHz,  $\text{CDCl}_3$ )  $\delta$  173.2 (d,  $J = 11.1$  Hz), 136.4, 133.7 (d,  $J = 2.5$  Hz), 131.8, 131.1,

129.8 (d,  $J = 1.4$  Hz), 126.9 (d,  $J = 4.4$  Hz), 64.6 (d,  $J = 10.4$  Hz), 27.1 (d,  $J = 5.5$  Hz), 18.7;  $^{19}\text{F}$  NMR (376 MHz,  $\text{CDCl}_3$ )  $\delta$  -64.48.

**HRMS** (ESI)  $m/z$  calcd. for  $\text{C}_{12}\text{H}_{15}\text{ClFNONa}$   $[\text{M}+\text{Na}]^+$  266.0718, found 266.0720.

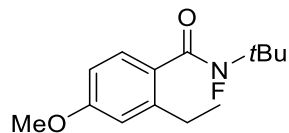

***N*-(tert-butyl)-2-ethyl-*N*-fluoro-4-methoxybenzamide (1e)<sup>4</sup>**

Yellow oil, 998 mg (40% yield, 10.0 mmol scale).  $^1\text{H}$  NMR (400 MHz,  $\text{CDCl}_3$ )  $\delta$  7.32 (d,  $J = 8.5$  Hz, 1H), 6.81-6.66 (m, 2H), 3.82 (s, 3H), 2.75 (q,  $J = 7.6$  Hz, 2H), 1.53 (d,  $J = 1.9$  Hz, 9H), 1.24 (t,  $J = 7.7$  Hz, 3H);  $^{13}\text{C}$  NMR (100 MHz,  $\text{CDCl}_3$ )  $\delta$  175.3 (d,  $J = 10.5$  Hz), 161.0, 144.7 (d,  $J = 1.9$  Hz), 129.8 (d,  $J = 5.0$  Hz), 126.9, 114.7, 110.4, 64.11 (d,  $J = 10.6$  Hz), 55.2, 27.1 (d,  $J = 5.7$  Hz), 26.4, 15.7;  $^{19}\text{F}$  NMR (376 MHz,  $\text{CDCl}_3$ )  $\delta$  -62.16.

**HRMS** (ESI)  $m/z$  calcd. for  $\text{C}_{14}\text{H}_{21}\text{FNO}_2$   $[\text{M}+\text{H}]^+$  254.1551, found 254.1547.

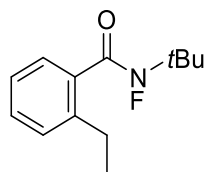

***N*-(tert-butyl)-2-ethyl-*N*-fluorobenzamide (1f)<sup>4</sup>**

Yellow oil, 694 mg (31% yield, 10.0 mmol scale).  $^1\text{H}$  NMR (400 MHz,  $\text{CDCl}_3$ )  $\delta$  7.38 (td,  $J = 7.4, 1.4$  Hz, 1H), 7.34-7.28 (m, 2H), 7.24 (td,  $J = 7.4, 1.4$  Hz, 1H), 2.77 (q,  $J = 7.6$  Hz, 2H), 1.58 (d,  $J = 2.0$  Hz, 9H), 1.27 (t,  $J = 7.6$  Hz, 3H);  $^{13}\text{C}$  NMR (100 MHz,  $\text{CDCl}_3$ )  $\delta$  175.0 (d,  $J = 10.9$  Hz), 141.6 (d,  $J = 2.2$  Hz), 134.6, 130.0 (d,  $J = 1.1$  Hz), 128.9, 127.1 (d,  $J = 4.4$  Hz), 125.4, 64.3 (d,  $J = 10.5$  Hz), 27.1 (d,  $J = 5.6$  Hz), 26.1, 15.7;  $^{19}\text{F}$  NMR (376 MHz,  $\text{CDCl}_3$ )  $\delta$  -63.36.

**HRMS** (ESI)  $m/z$  calcd. for  $\text{C}_{13}\text{H}_{19}\text{FNO}$   $[\text{M}+\text{H}]^+$  224.1445, found 224.1442.

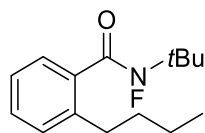

***N*-(tert-butyl)-2-butyl-*N*-fluorobenzamide (1g)<sup>4</sup>**



Yellow oil, 453 mg (36% yield, 5.0 mmol scale).  $^1\text{H NMR}$  (400 MHz,  $\text{CDCl}_3$ )  $\delta$  7.35-7.27 (m, 2H), 7.26-7.17 (m, 2H), 2.77-2.65 (m, 2H), 1.62-1.56 (m, 2H), 1.55 (d,  $J = 2.0$  Hz, 9H), 1.42-1.32 (m, 2H), 0.92 (t,  $J = 7.3$  Hz, 3H);  $^{13}\text{C NMR}$  (100 MHz,  $\text{CDCl}_3$ )  $\delta$  175.0 (d,  $J = 10.9$  Hz), 140.4 (d,  $J = 2.1$  Hz), 134.8, 129.8, 129.6, 127.2 (d,  $J = 4.3$  Hz), 125.3, 64.2 (d,  $J = 10.5$  Hz), 33.7, 32.8, 27.2 (d,  $J = 5.6$  Hz), 22.7, 13.9;  $^{19}\text{F NMR}$  (376 MHz,  $\text{CDCl}_3$ )  $\delta$  -63.35.

**HRMS** (ESI)  $m/z$  calcd. for  $\text{C}_{15}\text{H}_{23}\text{FNO}$   $[\text{M}+\text{H}]^+$  252.1758, found 252.1754.

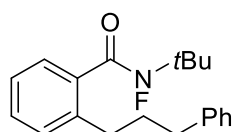

***N*-(*tert*-butyl)-*N*-fluoro-2-(3-phenylpropyl) benzamide (1h)<sup>4</sup>**

Yellow oil, 437 mg (28% yield, 5.0 mmol scale).  $^1\text{H NMR}$  (400 MHz,  $\text{CDCl}_3$ )  $\delta$  7.37-7.20 (m, 6H), 7.20-7.14 (m, 3H), 2.79-2.70 (m, 2H), 2.66 (t,  $J = 7.7$  Hz, 2H), 2.01-1.90 (m, 2H), 1.52 (d,  $J = 1.8$  Hz, 9H);  $^{13}\text{C NMR}$  (100 MHz,  $\text{CDCl}_3$ )  $\delta$  174.9 (d,  $J = 10.9$  Hz), 142.1, 139.8 (d,  $J = 2.0$  Hz), 134.9, 129.9, 129.6, 128.5, 128.3, 127.3 (d,  $J = 4.4$  Hz), 125.8, 125.5, 64.3 (d,  $J = 10.4$  Hz), 35.8, 33.0, 32.8, 27.1 (d,  $J = 5.6$  Hz);  $^{19}\text{F NMR}$  (376 MHz,  $\text{CDCl}_3$ )  $\delta$  -63.28.

**HRMS** (ESI)  $m/z$  calcd. for  $\text{C}_{20}\text{H}_{25}\text{FNO}$   $[\text{M}+\text{H}]^+$  314.1915, found 314.1911.

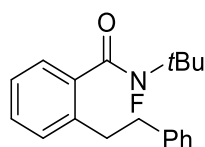

***N*-(*tert*-butyl)-*N*-fluoro-2-phenethylbenzamide (1i)<sup>4</sup>**

Yellow oil, 204 mg (23% yield, 3.0 mmol scale).  $^1\text{H NMR}$  (400 MHz,  $\text{CDCl}_3$ )  $\delta$  7.44-7.08 (m, 9H), 3.05-2.96 (m, 2H), 2.96-2.86 (m, 2H), 1.56 (d,  $J = 1.8$  Hz, 9H);  $^{13}\text{C NMR}$  (100 MHz,  $\text{CDCl}_3$ )  $\delta$  174.9 (d,  $J = 10.8$  Hz), 141.7, 139.3 (d,  $J = 2.0$  Hz), 134.8, 130.0, 129.9, 128.45, 128.38, 127.5 (d,  $J = 4.5$  Hz), 126.0, 125.7, 64.3 (d,  $J = 10.5$  Hz), 38.0, 35.5, 27.2 (d,  $J = 5.6$  Hz);  $^{19}\text{F NMR}$  (376 MHz,  $\text{CDCl}_3$ )  $\delta$  -63.08.

**HRMS** (ESI)  $m/z$  calcd. for  $\text{C}_{19}\text{H}_{23}\text{FNO}$   $[\text{M}+\text{H}]^+$  300.1758, found 300.1755.

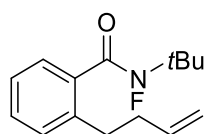

### 2-(but-3-en-1-yl)-*N*-(*tert*-butyl)-*N*-fluorobenzamide (1j)<sup>4</sup>

Yellow oil, 396 mg (32% yield, 5.0 mmol scale). <sup>1</sup>H NMR (400 MHz, CDCl<sub>3</sub>) δ 7.38-7.29 (m, 2H), 7.27-7.18 (m, 2H), 5.90-5.78 (m, 1H), 5.08-5.93 (m, 2H), 2.85-2.75 (m, 2H), 2.43-2.29 (m, 2H), 1.55 (d, *J* = 1.9 Hz, 9H); <sup>13</sup>C NMR (100 MHz, CDCl<sub>3</sub>) δ 174.8 (d, *J* = 10.9 Hz), 139.3 (d, *J* = 2.1 Hz), 137.9, 134.9, 129.9 (d, *J* = 1.4 Hz), 129.7, 127.3 (d, *J* = 4.4 Hz), 125.6, 115.0, 64.3 (d, *J* = 10.5 Hz), 35.5, 32.5, 27.2 (d, *J* = 5.6 Hz); <sup>19</sup>F NMR (376 MHz, CDCl<sub>3</sub>) δ -63.26.

HRMS (ESI) *m/z* calcd. for C<sub>15</sub>H<sub>21</sub>FNO [M+H]<sup>+</sup> 250.1602, found 250.1599.

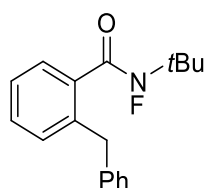

### 2-benzyl-*N*-(*tert*-butyl)-*N*-fluorobenzamide (1k)<sup>5</sup>

Yellow oil, 985 mg (35% yield, 10.0 mmol scale). <sup>1</sup>H NMR (400 MHz, CDCl<sub>3</sub>) δ 7.42-7.25 (m, 5H), 7.24-7.18 (m, 4H), 4.18 (s, 2H), 1.49 (s, 9H); <sup>13</sup>C NMR (100 MHz, CDCl<sub>3</sub>) δ 174.5, 140.5, 138.6, 135.0, 130.6, 130.2, 129.2, 128.4, 127.7 (d, *J* = 4.7 Hz), 126.1, 125.9, 64.3, 38.6, 27.0; <sup>19</sup>F NMR (376 MHz, CDCl<sub>3</sub>) δ -63.31.

HRMS (ESI) *m/z* calcd. for C<sub>18</sub>H<sub>21</sub>FNO [M+H]<sup>+</sup> 286.1602, found 286.1602.

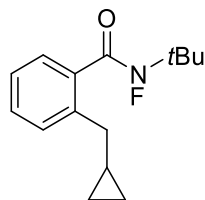

### *N*-(*tert*-butyl)-2-(cyclopropylmethyl)-*N*-fluorobenzamide (1l)<sup>1</sup>

Yellow oil, 394 mg (35% yield, 4.0 mmol scale). <sup>1</sup>H NMR (400 MHz, CDCl<sub>3</sub>) δ 7.43 (d, *J* = 7.7 Hz, 1H), 7.39-7.28 (m, 2H), 7.22 (t, *J* = 7.3 Hz, 1H), 2.64 (d, *J* = 6.9 Hz, 2H), 1.55 (d, *J* = 1.9 Hz, 9H), 1.08-0.97 (m, 1H), 0.58-0.47 (m, 2H), 0.22 (q, *J* = 5.0 Hz, 2H); <sup>13</sup>C NMR (100 MHz, CDCl<sub>3</sub>) δ 175.09 (d, *J* = 10.8 Hz), 139.66 (d, *J* = 2.0 Hz), 134.87, 130.03, 129.38, 127.15 (d, *J* = 4.4 Hz), 125.64, 64.46 (d, *J* = 10.3 Hz), 37.31, 27.32 (d, *J* = 5.7 Hz), 11.67, 5.01; <sup>19</sup>F NMR (376 MHz, CDCl<sub>3</sub>) δ -63.12.

HRMS (ESI) *m/z* calcd. for C<sub>15</sub>H<sub>21</sub>FNO [M+H]<sup>+</sup> 250.1602, found 250.1599.

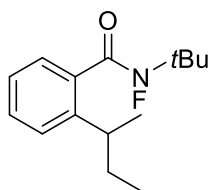

**2-(*sec*-butyl)-*N*-(*tert*-butyl)-*N*-fluorobenzamide (1m)**

Yellow oil, 406 mg (32% yield, 5.0 mmol scale).  $^1\text{H NMR}$  (400 MHz,  $\text{CDCl}_3$ )  $\delta$  7.44-7.37 (m, 1H), 7.33 (dd,  $J = 7.9, 1.3$  Hz, 1H), 7.30-7.2 (m, 2H), 2.91-2.86 (m, 1H), 1.76-1.61 (m, 2H), 1.59 (d,  $J = 1.9$  Hz, 9H), 1.27 (d,  $J = 6.9$  Hz, 3H), 0.85 (t,  $J = 7.4$  Hz, 3H);  $^{13}\text{C NMR}$  (101 MHz,  $\text{CDCl}_3$ )  $\delta$  175.15 (d,  $J = 11.3$  Hz), 144.9, 135.2, 129.9, 126.6 (d,  $J = 4.1$  Hz), 126.0, 125.3, 64.4 (d,  $J = 10.4$  Hz), 37.6, 31.0, 27.2 (d,  $J = 5.6$  Hz), 22.1, 12.2;  $^{19}\text{F NMR}$  (376 MHz,  $\text{CDCl}_3$ )  $\delta$  -62.74.

**HRMS** (ESI)  $m/z$  calcd. for  $\text{C}_{15}\text{H}_{23}\text{FNO}$   $[\text{M}+\text{H}]^+$  252.1758, found 252.1754.

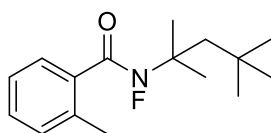

***N*-fluoro-2-methyl-*N*-(2,4,4-trimethylpentan-2-yl) benzamide (1n)<sup>6</sup>**

Yellow oil, 479 mg (37% yield, 5.0 mmol scale).  $^1\text{H NMR}$  (400 MHz,  $\text{CDCl}_3$ )  $\delta$  7.30 (t,  $J = 7.3$  Hz, 2H), 7.21 (d,  $J = 7.0$  Hz, 2H), 2.42 (s, 3H), 1.93 (s, 2H), 1.63 (s, 6H), 1.11 (s, 9H);  $^{13}\text{C NMR}$  (101 MHz,  $\text{CDCl}_3$ )  $\delta$  173.6 (d,  $J = 11.2$  Hz), 135.2, 135.1 (d,  $J = 2.4$  Hz), 130.3, 129.6, 126.8 (d,  $J = 4.5$  Hz), 125.2, 67.9 (d,  $J = 9.6$  Hz), 51.1 (d,  $J = 3.6$  Hz), 31.4, 31.2, 27.5 (d,  $J = 6.2$  Hz), 19.2;  $^{19}\text{F NMR}$  (376 MHz,  $\text{CDCl}_3$ )  $\delta$  -62.52.

**HRMS** (ESI)  $m/z$  calcd. for  $\text{C}_{16}\text{H}_{25}\text{FNO}$   $[\text{M}+\text{H}]^+$  266.1915, found 266.1915.

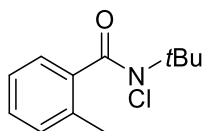

***N*-(*tert*-butyl)-*N*-chloro-2-methylbenzamide (3a)<sup>1</sup>**

Colorless oil, 870 mg (78% yield, 5.0 mmol scale).  $^1\text{H NMR}$  (400 MHz,  $\text{CDCl}_3$ )  $\delta$  7.25-7.20 (m, 2H), 7.17 (t,  $J = 7.9$  Hz, 2H), 2.35 (s, 3H), 1.60 (s, 9H);  $^{13}\text{C NMR}$  (101 MHz,  $\text{CDCl}_3$ )  $\delta$  174.6, 137.8, 134.3, 130.3, 129.1, 126.1, 125.6, 64.5, 28.7, 19.0.

**HRMS** (ESI)  $m/z$  calcd. for  $\text{C}_{12}\text{H}_{17}\text{ClNO}$   $[\text{M}+\text{H}]^+$  226.0993, found 226.0994.

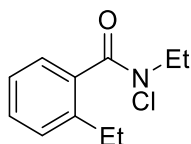

***N*-chloro-*N*-ethyl-2-methylbenzamide (3b)**

Colorless oil, 763 mg (72% yield, 5.0 mmol scale).  $^1\text{H NMR}$  (400 MHz,  $\text{CDCl}_3$ )  $\delta$  7.38-7.34 (m, 1H), 7.31-7.26 (m, 1H), 7.24-7.19 (m, 2H), 3.72-3.60 (m, 2H), 2.65 (q,  $J = 7.6$  Hz, 2H), 1.25 (dt,  $J = 12.3, 7.3$  Hz, 6H);  $^{13}\text{C NMR}$  (101 MHz,  $\text{CDCl}_3$ )  $\delta$  141.0, 134.1, 129.9, 129.0, 126.1, 125.9, 26.1, 15.2, 13.1.

**HRMS** (ESI)  $m/z$  calcd. for  $\text{C}_{11}\text{H}_{15}\text{ClNO}$   $[\text{M}+\text{H}]^+$  212.0837, found 212.0840.

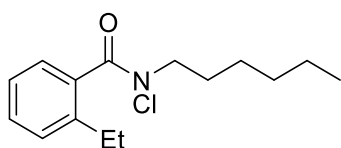

***N*-chloro-2-ethyl-*N*-hexylbenzamide (3c)**

Colorless oil, 994 mg (75% yield, 5.0 mmol scale).  $^1\text{H NMR}$  (400 MHz,  $\text{CDCl}_3$ )  $\delta$  7.38-7.34 (m, 1H), 7.32-7.27 (m, 1H), 7.25-7.16 (m, 2H), 3.61 (s, 2H), 2.65 (q,  $J = 7.6$  Hz, 2H), 1.71 (p,  $J = 7.1$  Hz, 2H), 1.33-1.15 (m, 9H), 0.87 (t,  $J = 6.8$  Hz, 3H);  $^{13}\text{C NMR}$  (101 MHz,  $\text{CDCl}_3$ )  $\delta$  141.0, 134.2, 129.8, 128.9, 126.3, 125.8, 31.3, 27.5, 26.1, 25.7, 22.5, 15.2, 13.9.

**HRMS** (ESI)  $m/z$  calcd. for  $\text{C}_{15}\text{H}_{23}\text{ClNO}$   $[\text{M}+\text{H}]^+$  268.1463, found 268.1464.

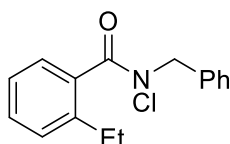

***N*-benzyl-*N*-chloro-2-ethylbenzamide (3d)**

Colorless oil, 948 mg (69% yield, 5.0 mmol scale).  $^1\text{H NMR}$  (400 MHz,  $\text{CDCl}_3$ )  $\delta$  7.42-7.15 (m, 9H), 4.83 (s, 2H), 2.65 (q,  $J = 7.6$  Hz, 2H), 1.22 (t,  $J = 7.6$  Hz, 3H);  $^{13}\text{C NMR}$  (101 MHz,  $\text{CDCl}_3$ )  $\delta$  141.2, 135.2, 133.8, 130.1, 129.0, 128.8, 128.4, 128.2, 126.5, 125.9, 26.2, 15.2.

**HRMS** (ESI)  $m/z$  calcd. for  $\text{C}_{16}\text{H}_{17}\text{ClNO}$   $[\text{M}+\text{H}]^+$  274.0993, found 274.0995.

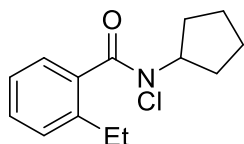

***N*-chloro-*N*-cyclopentyl-2-ethylbenzamide (3e)**

Colorless oil, 976 mg (78% yield, 5.0 mmol scale).  $^1\text{H NMR}$  (400 MHz,  $\text{CDCl}_3$ )  $\delta$  7.36 (td,  $J = 7.4, 1.6$  Hz, 1H), 7.31-7.27 (m, 1H), 7.23 (td,  $J = 7.3, 1.4$  Hz, 1H), 7.18 (dd,  $J = 7.6, 1.6$  Hz, 1H), 4.49 (s, 1H), 2.64 (q,  $J = 7.6$  Hz, 2H), 1.95-1.71 (m, 6H), 1.56-1.40 (m, 2H), 1.23 (t,  $J = 7.6$  Hz, 3H);  $^{13}\text{C NMR}$  (101 MHz,  $\text{CDCl}_3$ )  $\delta$  140.9, 134.8, 129.7, 129.1, 126.0, 126.0, 29.6, 26.1, 24.8, 15.3.

**HRMS** (ESI)  $m/z$  calcd. for  $\text{C}_{14}\text{H}_{19}\text{ClNO}$   $[\text{M}+\text{H}]^+$  252.1150, found 252.1149.

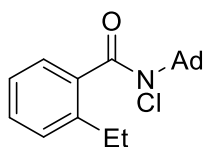

***N*-((3s,5s,7s)-adamantan-1-yl)-*N*-chloro-2-ethylbenzamide (3f)**

Colorless oil, 1.07 g (68% yield, 5.0 mmol scale).  $^1\text{H NMR}$  (400 MHz,  $\text{CDCl}_3$ )  $\delta$  7.33-7.27 (m, 1H), 7.25-7.16 (m, 3H), 2.70 (q,  $J = 7.6$  Hz, 2H), 2.36 (s, 6H), 2.22-2.16 (m, 3H), 1.71 (q,  $J = 12.3$  Hz, 6H), 1.26 (t,  $J = 7.6$  Hz, 3H);  $^{13}\text{C NMR}$  (101 MHz,  $\text{CDCl}_3$ )  $\delta$  174.0, 140.2, 137.8, 129.1, 128.6, 126.1, 125.6, 65.8, 40.7, 36.2, 30.5, 26.0, 15.1.

**HRMS** (ESI)  $m/z$  calcd. for  $\text{C}_{19}\text{H}_{25}\text{ClNO}$   $[\text{M}+\text{H}]^+$  318.1619, found 318.1615.

## Copper-catalyzed intramolecular iminolactonization cyclization reactions of remote ( $sp^3$ )-H bonds in carboxamides

### General procedure A:

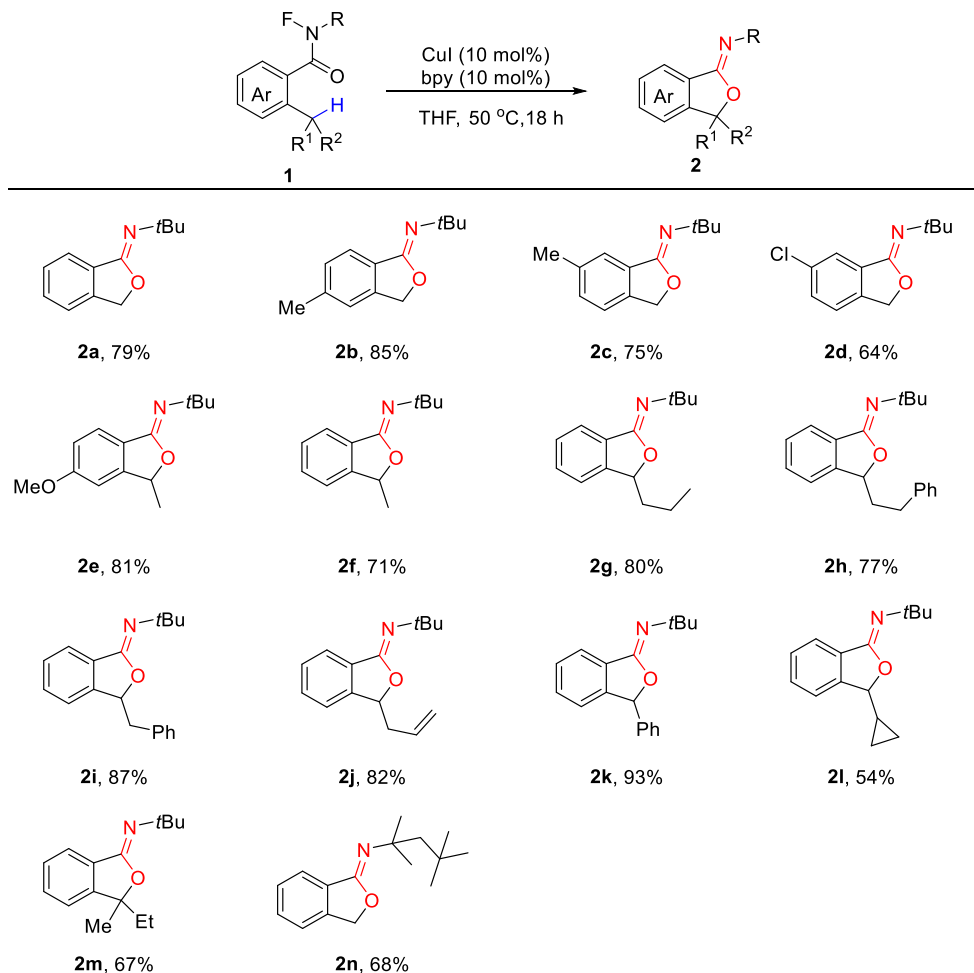

Under argon atmosphere, an oven-dried resealable Schlenk tube equipped with a magnetic stir bar was charged with CuI (0.04 mmol, 10 mol%), bpy (0.04mmol, 10 mol%), and anhydrous THF (2.0 mL). Then, *N*-fluorocarboxamide (0.40 mmol, 1.0 equiv.) was sequentially added into the mixture and the reaction mixture was stirred at 50 °C for 18 h. Upon completion (monitored by TLC), the precipitate was filtered off and washed by DCM. The filtrate was evaporated and the residue was purified by column chromatography on silica gel to afford the desired product.

### General procedure B:

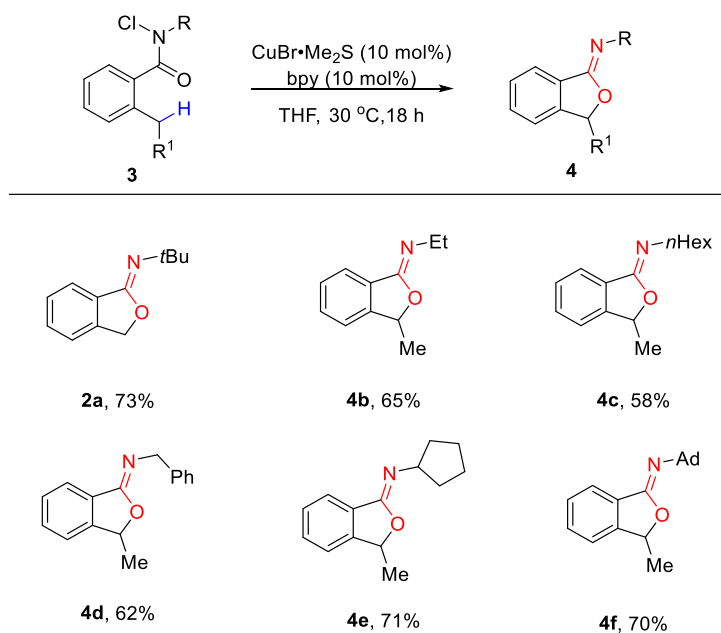

Under argon atmosphere, an oven-dried resealable Schlenk tube equipped with a magnetic stir bar was charged with  $\text{CuBr}\cdot\text{Me}_2\text{S}$  (0.04 mmol, 10 mol%),  $\text{bpy}$  (0.04 mmol, 10 mol%), and anhydrous THF (2.0 mL). Then, *N*-chlorocarboxamide (0.40 mmol, 1.0 equiv.) was sequentially added into the mixture and the reaction mixture was stirred at rt for 18 h. Upon completion (monitored by TLC), the precipitate was filtered off and washed by DCM. The filtrate was evaporated and the residue was purified by column chromatography on silica gel to afford the desired product.

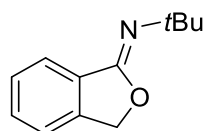

**(Z)-N-(tert-butyl)isobenzofuran-1(3H)-imine (2a)<sup>6</sup>**

White solid, 59.6 mg (79% yield), mp: 104-106 °C. <sup>1</sup>H NMR (400 MHz,  $\text{CDCl}_3$ ) 7.81 (d,  $J = 7.6$  Hz, 1H), 7.49-7.44 (m, 1H), 7.42-7.36 (m, 1H), 7.35-7.32 (m, 1H), 5.31 (s, 2H), 1.40 (s, 9H); <sup>13</sup>C NMR (101 MHz,  $\text{CDCl}_3$ )  $\delta$  157.0, 142.5, 132.0, 130.9, 128.2, 123.7, 121.1, 72.0, 53.6, 30.1.

HRMS (ESI)  $m/z$  calcd. for  $\text{C}_{12}\text{H}_{16}\text{NO}$   $[\text{M}+\text{H}]^+$  190.1226, found 190.1226.

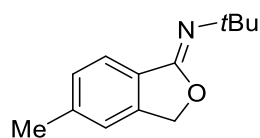

**(Z)-N-(tert-butyl)-5-methylisobenzofuran-1(3H)-imine (2b)**

White solid, 68.8 mg (85% yield), mp: 110-114 °C. <sup>1</sup>H NMR (400 MHz, CDCl<sub>3</sub>) δ 7.70 (d, *J* = 7.8 Hz, 1H), 7.20 (d, *J* = 7.6 Hz, 1H), 7.15-7.11 (m, 1H), 5.26 (s, 2H), 2.42 (s, 3H), 1.40 (s, 9H); <sup>13</sup>C NMR (101 MHz, CDCl<sub>3</sub>) δ 157.3, 142.9, 141.4, 129.3, 126.6, 123.5, 121.5, 71.9, 53.5, 30.1, 21.7.

**HRMS** (ESI) *m/z* calcd. for C<sub>13</sub>H<sub>18</sub>NO [M+H]<sup>+</sup> 204.1383, found 204.1380.

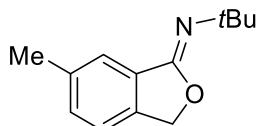

**(Z)-N-(tert-butyl)-6-methylisobenzofuran-1(3H)-imine (2c)**

White solid, 60.7 mg (75% yield), mp: 108-110 °C. <sup>1</sup>H NMR (400 MHz, CDCl<sub>3</sub>) δ 7.62 (s, 1H), 7.31-7.25 (m, 1H), 7.23-7.19 (m, 1H), 5.27 (s, 2H), 2.39 (s, 3H), 1.40 (s, 9H); <sup>13</sup>C NMR (101 MHz, CDCl<sub>3</sub>) δ 157.2, 139.7, 138.3, 132.1, 140.0, 123.8, 120.8, 72.0, 53.5, 30.1, 21.1.

**HRMS** (ESI) *m/z* calcd. for C<sub>13</sub>H<sub>18</sub>NO [M+H]<sup>+</sup> 204.1383, found 204.1380.

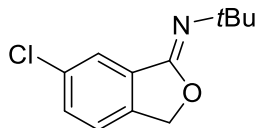

**(Z)-N-(tert-butyl)-6-chloroisobenzofuran-1(3H)-imine (2d)**

Colorless oil, 57.1 mg (64% yield). <sup>1</sup>H NMR (400 MHz, CDCl<sub>3</sub>) δ 7.78 (d, *J* = 1.9 Hz, 1H), 7.43 (dd, *J* = 8.1, 1.9 Hz, 1H), 7.30-7.21 (m, 1H), 5.28 (s, 2H), 1.38 (s, 9H); <sup>13</sup>C NMR (101 MHz, CDCl<sub>3</sub>) δ 155.3, 140.6, 134.5, 134.1, 131.1, 123.8, 122.4, 71.8, 53.7, 30.0.

**HRMS** (ESI) *m/z* calcd. for C<sub>12</sub>H<sub>15</sub>ClNO [M+H]<sup>+</sup> 224.0837, found 224.0840.

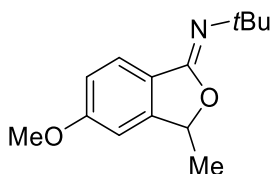

**(Z)-N-(tert-butyl)-5-methoxy-3-methylisobenzofuran-1(3H)-imine (2e)**

White solid, 75.0 mg (81% yield), mp: 123-126 °C. <sup>1</sup>H NMR (400 MHz, CDCl<sub>3</sub>) δ 7.28-7.22 (m, 1H), 7.15 (d, *J* = 8.3 Hz, 1H), 7.02 (dd, *J* = 8.3, 2.4 Hz, 1H), 5.49 (q, *J* = 6.5



Hz, 1H), 3.86 (s, 3H), 1.53 (d,  $J = 6.5$  Hz, 3H), 1.40 (s, 9H);  $^{13}\text{C}$  NMR (101 MHz,  $\text{CDCl}_3$ )  $\delta$  160.2, 156.7, 139.6, 133.3, 121.6, 119.9, 105.7, 79.4, 55.7, 53.5, 30.0, 21.5.

**HRMS** (ESI)  $m/z$  calcd. for  $\text{C}_{14}\text{H}_{20}\text{NO}_2$   $[\text{M}+\text{H}]^+$  234.1489, found 234.1492.

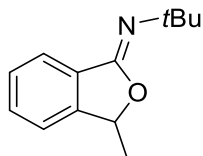

**(Z)-N-(tert-butyl)-3-methylisobenzofuran-1(3H)-imine (2f)**

Colorless oil, 57.9 mg (71% yield).  $^1\text{H}$  NMR (400 MHz,  $\text{CDCl}_3$ )  $\delta$  7.80 (d,  $J = 7.6$  Hz, 1H), 7.48-7.43 (m, 1H), 7.41-7.35 (m, 1H), 7.29-7.24 (m, 1H), 5.55 (q,  $J = 6.6$  Hz, 1H), 1.56 (d,  $J = 6.6$  Hz, 3H), 1.40 (s, 9H);  $^{13}\text{C}$  NMR (101 MHz,  $\text{CDCl}_3$ )  $\delta$  156.6, 147.1, 131.8, 130.9, 128.3, 123.7, 120.8, 79.6, 53.5, 30.0, 21.3.

**HRMS** (ESI)  $m/z$  calcd. for  $\text{C}_{13}\text{H}_{18}\text{NO}$   $[\text{M}+\text{H}]^+$  204.1383, found 204.1380.

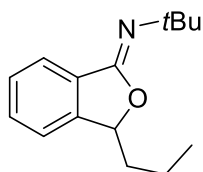

**(Z)-N-(tert-butyl)-3-propylisobenzofuran-1(3H)-imine (2g)**

Colorless oil, 73.5 mg (80% yield).  $^1\text{H}$  NMR (400 MHz,  $\text{CDCl}_3$ )  $\delta$  7.79 (d,  $J = 7.7$  Hz, 1H), 7.48-7.42 (m, 1H), 7.40-7.34 (m, 1H), 7.29-7.23 (m, 1H), 5.46 (dd,  $J = 7.7, 3.9$  Hz, 1H), 2.00-1.90 (m, 1H), 1.76-1.61 (m, 1H), 1.57-1.38 (m, 11H), 0.97 (t,  $J = 7.4$  Hz, 3H);  $^{13}\text{C}$  NMR (101 MHz,  $\text{CDCl}_3$ )  $\delta$  156.7, 145.9, 132.2, 130.8, 128.2, 123.6, 120.9, 83.2, 53.5, 37.8, 30.0, 18.3, 14.0.

**HRMS** (ESI)  $m/z$  calcd. for  $\text{C}_{15}\text{H}_{22}\text{NO}$   $[\text{M}+\text{H}]^+$  232.1696, found 232.1695.

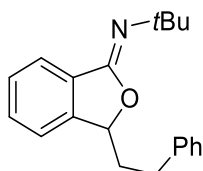

**(Z)-N-(tert-butyl)-3-phenethylisobenzofuran-1(3H)-imine (2h)**

Colorless oil, 89.6 mg (77% yield).  $^1\text{H}$  NMR (400 MHz,  $\text{CDCl}_3$ )  $\delta$  7.81 (dd,  $J = 7.6, 1.2$  Hz, 1H), 7.46-7.41 (m, 1H), 7.40-7.35 (m, 1H), 7.32-7.18 (m, 6H), 5.46 (dd,  $J = 8.2, 3.6$  Hz, 1H), 2.87-2.69 (m, 2H), 2.33-2.24 (m, 1H), 2.05-1.93 (m, 1H), 1.45 (s, 9H);

$^{13}\text{C}$  NMR (101 MHz,  $\text{CDCl}_3$ )  $\delta$  156.5, 145.6, 141.2, 132.2, 133.0, 128.6, 128.5, 128.4, 126.1, 123.7, 120.9, 82.3, 53.7, 37.5, 31.4, 30.1.

**HRMS** (ESI)  $m/z$  calcd. for  $\text{C}_{20}\text{H}_{24}\text{NO}$   $[\text{M}+\text{H}]^+$  294.1852, found 294.1852.

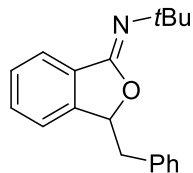

**(Z)-3-benzyl-N-(tert-butyl)isobenzofuran-1(3H)-imine (2i)**

Colorless oil, 96.6 mg (87% yield).  $^1\text{H}$  NMR (400 MHz,  $\text{CDCl}_3$ )  $\delta$  7.77-7.73 (m, 1H), 7.43-7.32 (m, 2H), 7.31-7.19 (m, 5H), 7.09-7.04 (m, 1H), 5.67 (t,  $J = 6.3$  Hz, 1H), 3.21-3.08 (m, 2H), 1.38 (s, 9H);  $^{13}\text{C}$  NMR (101 MHz,  $\text{CDCl}_3$ )  $\delta$  155.8, 145.0, 136.3, 132.4, 130.6, 129.7, 128.5, 128.4, 126.8, 123.7, 121.5, 83.5, 53.5, 42.0, 30.1.

**HRMS** (ESI)  $m/z$  calcd. for  $\text{C}_{19}\text{H}_{22}\text{NO}$   $[\text{M}+\text{H}]^+$  280.1696, found 280.1700.

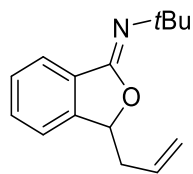

**(Z)-3-allyl-N-(tert-butyl)isobenzofuran-1(3H)-imine (2j)**

Colorless oil, 75.3 mg (82% yield).  $^1\text{H}$  NMR (400 MHz,  $\text{CDCl}_3$ )  $\delta$  7.83-7.77 (m, 1H), 7.48-7.42 (m, 1H), 7.41-7.36 (m, 1H), 7.32-7.28 (m, 1H), 5.82-5.70 (m, 1H), 5.51 (dd,  $J = 6.7, 4.8$  Hz, 1H), 5.20-5.07 (m, 2H), 2.77-2.67 (m, 1H), 2.61-2.47 (m, 1H), 1.40 (s, 9H);  $^{13}\text{C}$  NMR (101 MHz,  $\text{CDCl}_3$ )  $\delta$  156.4, 145.2, 132.4, 132.3, 130.8, 128.4, 123.7, 121.1, 118.8, 82.4, 53.6, 39.9, 30.0.

**HRMS** (ESI)  $m/z$  calcd. for  $\text{C}_{15}\text{H}_{20}\text{NO}$   $[\text{M}+\text{H}]^+$  230.1539, found 230.1540.

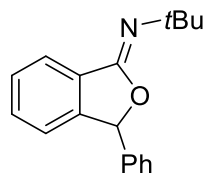

**(Z)-N-(tert-butyl)-3-phenylisobenzofuran-1(3H)-imine (2k)**

White solid, 98.0 mg (93% yield), mp: 135-138 °C.  $^1\text{H}$  NMR (400 MHz,  $\text{CDCl}_3$ )  $\delta$  7.86-7.81 (m, 1H), 7.41-7.31 (m, 5H), 7.29-7.25 (m, 2H), 7.15-7.11 (m, 1H), 6.36 (s,

1H), 1.43 (s, 9H); <sup>13</sup>C NMR (101 MHz, CDCl<sub>3</sub>) δ 156.1, 145.9, 139.3, 131.5, 131.2, 128.8, 128.6, 128.6, 126.5, 123.6, 122.0, 84.9, 53.8, 30.1.

**HRMS** (ESI) m/z calcd. for C<sub>18</sub>H<sub>20</sub>NO [M+H]<sup>+</sup> 266.1539, found 230.1541.

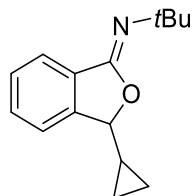

**(Z)-N-(tert-butyl)-3-cyclopropylisobenzofuran-1(3H)-imine (2l)**

Colorless oil, 52.7 mg (58% yield). <sup>1</sup>H NMR (400 MHz, CDCl<sub>3</sub>) δ 7.79 (d, *J* = 7.6 Hz, 1H), 7.49-7.43 (m, 1H), 7.42-7.36 (m, 2H), 4.98 (d, *J* = 7.3 Hz, 1H), 1.40 (s, 9H), 1.17-1.07 (m, 1H), 0.73-0.43 (m, 4H); <sup>13</sup>C NMR (101 MHz, CDCl<sub>3</sub>) δ 157.1, 144.1, 130.6, 129.3, 126.9, 122.0, 119.8, 84.5, 52.0, 28.4, 13.8, 0.3.

**HRMS** (ESI) m/z calcd. for C<sub>15</sub>H<sub>20</sub>NO [M+H]<sup>+</sup> 230.1539, found 230.1540.

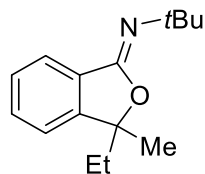

**(Z)-N-(tert-butyl)-3-ethyl-3-methylisobenzofuran-1(3H)-imine (2m)**

Colorless oil, 61.4 mg (67% yield). <sup>1</sup>H NMR (400 MHz, CDCl<sub>3</sub>) δ 7.78 (d, *J* = 7.7 Hz, 1H), 7.47-7.42 (m, 1H), 7.38-7.33 (m, 1H), 7.19 (dd, *J* = 7.5, 1.0 Hz, 1H), 2.05-1.95 (m, 1H), 1.90-1.80 (m, 1H), 1.56 (s, 3H), 1.41 (s, 9H), 0.71 (t, *J* = 7.3 Hz, 3H); <sup>13</sup>C NMR (101 MHz, CDCl<sub>3</sub>) δ 156.5, 149.2, 132.2, 130.9, 128.2, 123.6, 120.2, 89.3, 53.4, 33.7, 29.9, 26.5, 8.0.

**HRMS** (ESI) m/z calcd. for C<sub>15</sub>H<sub>22</sub>NO [M+H]<sup>+</sup> 232.1696, found 232.1695.

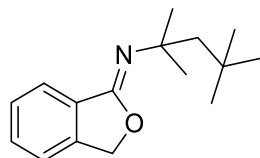

**(Z)-N-(2,4,4-trimethylpentan-2-yl)isobenzofuran-1(3H)-imine (2n)**

Colorless oil, 66.0 mg (68% yield). <sup>1</sup>H NMR (400 MHz, CDCl<sub>3</sub>) δ 7.77 (d, *J* = 7.6 Hz, 1H), 7.49-7.42 (m, 1H), 7.41-7.35 (m, 1H), 7.34-7.30 (m, 1H), 5.29 (s, 2H), 1.75 (s, 2H), 1.44 (s, 6H), 1.02 (s, 9H); <sup>13</sup>C NMR (101 MHz, CDCl<sub>3</sub>) δ 155.1, 142.3, 132.5,

130.6, 128.2, 123.7, 121.1, 71.8, 57.3, 55.2, 32.1, 31.9, 30.4.

**HRMS** (ESI)  $m/z$  calcd. for  $C_{16}H_{24}NO$   $[M+H]^+$  246.1852, found 246.1853.

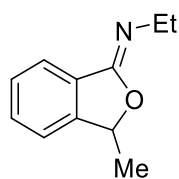

**(Z)-N-ethyl-3-methylisobenzofuran-1(3H)-imine (4b)**

Colorless oil, 45.1 mg (65% yield).  **$^1H$  NMR** (400 MHz,  $CDCl_3$ )  $\delta$  7.84 (d,  $J = 7.6$  Hz, 1H), 7.52-7.46 (m, 1H), 7.41 (dd,  $J = 7.4, 7.4$  Hz, 1H), 7.32-7.28 (m, 1H), 5.56 (q,  $J = 6.6$  Hz, 1H), 3.54 (q,  $J = 7.3$  Hz, 2H), 1.58 (d,  $J = 6.6$  Hz, 3H), 1.28 (t,  $J = 7.3$  Hz, 3H);  **$^{13}C$  NMR** (101 MHz,  $CDCl_3$ )  $\delta$  159.4, 147.7, 131.2, 130.3, 128.5, 123.3, 121.0, 79.8, 41.7, 21.2, 16.0.

**HRMS** (ESI)  $m/z$  calcd. for  $C_{11}H_{14}NO$   $[M+H]^+$  176.1070, found 176.1070.

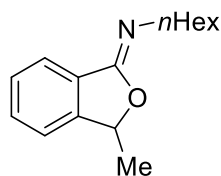

**(Z)-N-hexyl-3-methylisobenzofuran-1(3H)-imine (4c)**

Colorless oil, 53.0 mg (58% yield).  **$^1H$  NMR** (400 MHz,  $CDCl_3$ )  $\delta$  7.83 (d,  $J = 7.6$  Hz, 1H), 7.50-7.46 (m, 1H), 7.41 (dd,  $J = 7.6, 7.6$  Hz, 1H), 7.32-7.28 (m, 1H), 5.55 (q,  $J = 6.6$  Hz, 1H), 3.50 (t,  $J = 7.4$  Hz, 2H), 1.71-1.63 (m, 2H), 1.58 (d,  $J = 6.6$  Hz, 3H), 1.44-1.36 (m, 2H), 1.36-1.30 (m, 4H), 0.92-0.86 (m, 3H);  **$^{13}C$  NMR** (101 MHz,  $CDCl_3$ )  $\delta$  162.6, 147.7, 131.1, 128.5, 123.3, 120.9, 79.6, 47.4, 31.8, 30.9, 27.3, 22.7, 21.3, 14.1.

**HRMS** (ESI)  $m/z$  calcd. for  $C_{15}H_{22}NO$   $[M+H]^+$  232.1696, found 232.1695.

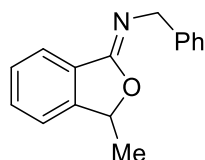

**(Z)-N-benzyl-3-methylisobenzofuran-1(3H)-imine (4d)**

Colorless oil, 58.1 mg (62% yield).  **$^1H$  NMR** (400 MHz,  $CDCl_3$ )  $\delta$  7.89 (d,  $J = 7.6$  Hz, 1H), 7.53-7.47 (m, 1H), 7.46-7.40 (m, 3H), 7.35-7.29 (m, 3H), 7.25-7.20 (m, 1H), 5.61 (q,  $J = 6.6$  Hz, 1H), 4.74 (s, 2H), 1.60 (d,  $J = 6.6$  Hz, 3H);  **$^{13}C$  NMR** (101 MHz,  $CDCl_3$ )

$\delta$  160.2, 147.9, 140.8, 131.4, 130.2, 128.6, 128.3, 127.9, 126.5, 123.6, 121.0, 80.1, 51.0, 21.2.

**HRMS** (ESI)  $m/z$  calcd. for  $C_{16}H_{16}NO$   $[M+H]^+$  238.1226, found 238.1227.

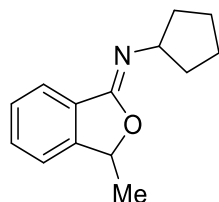

**(Z)-N-cyclopentyl-3-methylisobenzofuran-1(3H)-imine (4e)**

Colorless oil, 60.8 mg (71% yield).  $^1H$  NMR (400 MHz,  $CDCl_3$ )  $\delta$  7.87-7.82 (m, 1H), 7.49-7.42 (m, 1H), 7.42-7.36 (m, 1H), 7.30-7.25 (m, 1H), 5.54 (q,  $J = 6.6$  Hz, 1H), 4.27-4.20 (m, 1H), 2.05-1.93 (m, 2H), 1.83-1.74 (m, 2H), 1.64-1.53 (m, 7H);  $^{13}C$  NMR (101 MHz,  $CDCl_3$ )  $\delta$  158.7, 147.7, 131.0, 130.5, 128.4, 123.4, 120.9, 79.5, 57.7, 34.2, 34.1, 24.4, 21.3.

**HRMS** (ESI)  $m/z$  calcd. for  $C_{14}H_{18}NO$   $[M+H]^+$  216.1383, found 216.1384.

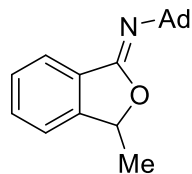

**(Z)-N-((3s,5s,7s)-adamantan-1-yl)-3-methylisobenzofuran-1(3H)-imine (4f)**

Colorless oil, 77.6 mg (70% yield).  $^1H$  NMR (400 MHz,  $CDCl_3$ )  $\delta$  7.96-7.76 (m, 1H), 7.50-7.44 (m, 1H), 7.39 (dd,  $J = 7.4, 7.4$  Hz, 1H), 7.27 (d,  $J = 8.2$  Hz, 1H), 5.56 (q,  $J = 6.5$  Hz, 1H), 2.16-2.01 (m, 9H), 1.77-1.66 (m, 6H), 1.58 (d,  $J = 6.6$  Hz, 3H);  $^{13}C$  NMR (101 MHz,  $CDCl_3$ )  $\delta$  156.9, 147.1, 131.7, 131.1, 128.4, 124.0, 120.8, 79.9, 42.4, 36.8, 29.9, 21.3.

**HRMS** (ESI)  $m/z$  calcd. for  $C_{19}H_{24}NO$   $[M+H]^+$  282.1852, found 282.1852.

## Mechanism study

### Radical inhibition experiments

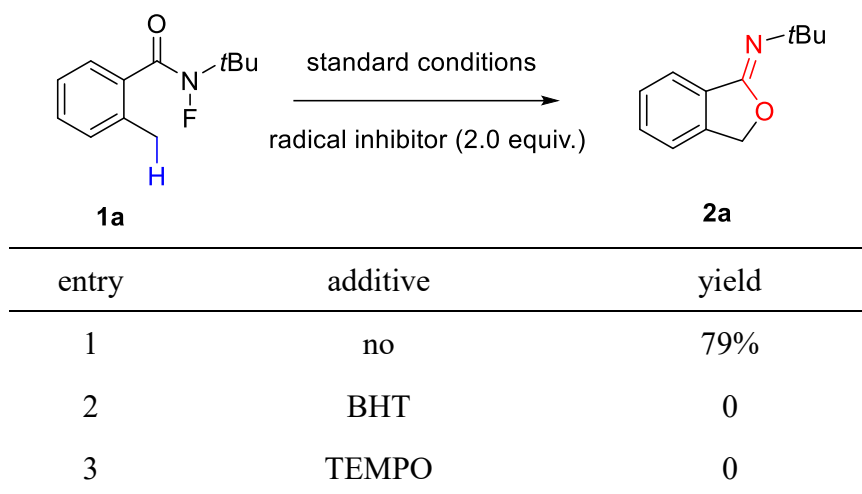

Under argon atmosphere, an oven-dried resealable Schlenk tube equipped with a magnetic stir bar was charged with CuI (0.02 mmol, 10 mol%), bpy (0.02mmol, 10 mol%), additive (0.40 mmol), and anhydrous THF (1.0 mL). Then, *N*-fluorocarocarboxamide **1a** (0.20 mmol) was sequentially added into the mixture and the reaction mixture was stirred at 50 °C for 18 h. Then, the precipitate was filtered off and washed by DCM. The reaction mixture was monitored by TLC and the target product **2a** was strongly suppressed when BHT and TEMPO were added in standard condition.

### Control experiments

#### Synthesis of the substrate **5a** and **5b**:

The substrate **5a** was synthesized according to the literature procedures.<sup>1</sup>

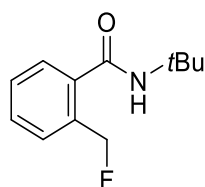

#### *N*-(*tert*-butyl)-2-(fluoromethyl)benzamide (**5a**)<sup>1</sup>

White solid, 161 mg (79% yield, 1.0 mmol scale). <sup>1</sup>H NMR (400 MHz, CDCl<sub>3</sub>) δ 7.53-7.41 (m, 3H), 7.41-7.34 (m, 1H), 5.93 (s, 1H), 5.59 (d, *J* = 48.1 Hz, 2H), 1.46 (s, 9H); <sup>13</sup>C NMR (101 MHz, CDCl<sub>3</sub>) δ 168.0, 136.6 (d, *J* = 3.7 Hz), 134.3 (d, *J* = 16.3 Hz), 130.2,

128.8, 128.7 (d,  $J = 2.7$  Hz), 127.2 82.9 (d,  $J = 164.2$  Hz), 52.0, 28.8;  $^{19}\text{F}$  NMR (376 MHz,  $\text{CDCl}_3$ )  $\delta$  -205.45.

**HRMS** (ESI)  $m/z$  calcd. for  $\text{C}_{12}\text{H}_{17}\text{FNO}$   $[\text{M}+\text{H}]^+$  210.1289, found 210.1287.

The substrate **5b** was synthesized according to the literature procedures.<sup>6</sup>

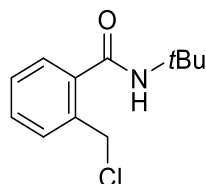

### *N*-(*tert*-butyl)-2-(chloromethyl)benzamide (**5b**)<sup>6</sup>

White solid, 150 mg (68% yield, 1.0 mmol scale).  $^1\text{H}$  NMR (400 MHz,  $\text{CDCl}_3$ )  $\delta$  7.41-7.35 (m, 3H), 7.34-7.26 (m, 1H), 5.93 (s, 1H), 4.74 (s, 2H), 1.45 (s, 9H);  $^{13}\text{C}$  NMR (101 MHz,  $\text{CDCl}_3$ )  $\delta$  168.4, 137.8, 134.9, 130.7, 130.1, 128.8, 127.6, 52.2, 44.1, 28.8.

**HRMS** (ESI)  $m/z$  calcd. for  $\text{C}_{12}\text{H}_{17}\text{ClNO}$   $[\text{M}+\text{H}]^+$  226.0993, found 226.0996.

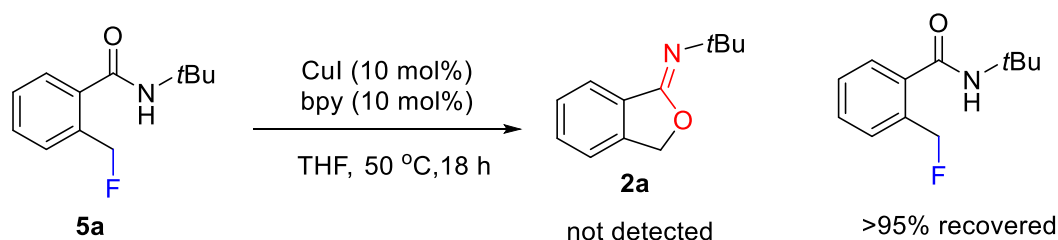

Under argon atmosphere, an oven-dried resealable Schlenk tube equipped with a magnetic stir bar was charged with  $\text{CuI}$  (0.020 mmol, 10 mol%),  $\text{bpy}$  (0.020 mmol, 10 mol%), and anhydrous THF (1.0 mL). Then, the substrate **5a** (0.20 mmol, 41.8 mg) was sequentially added into the mixture and the reaction mixture was stirred at 50 °C for 18 h. The reaction mixture was monitored by TLC, the formation of iminolactone **2a** was not observed. The filtrate was evaporated and the residue was purified by column chromatography on silica gel to afford the substrate **5a** (40.7 mg).

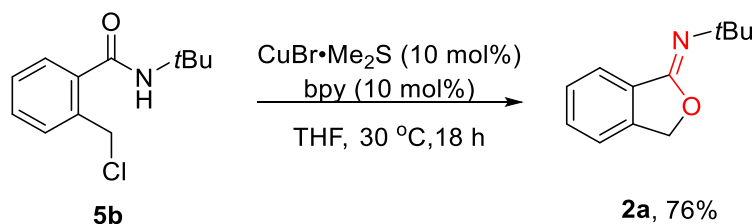

Under argon atmosphere, an oven-dried resealable Schlenk tube equipped with a

magnetic stir bar was charged with CuBr·Me<sub>2</sub>S (0.020 mmol, 10 mol%), bpy (0.020mmol, 10 mol%), and anhydrous THF (1.0 mL). Then, the substrate **5b** (0.20 mmol, 1.0 equiv.) was sequentially added into the mixture and the reaction mixture was stirred at 30 °C for 18 h. The reaction mixture was monitored by TLC, the formation of iminolactone **2a** was observed. The filtrate was evaporated and the residue was purified by column chromatography on silica gel to afford the product **2a** (28.5 mg, 76%).



## Lactamization of *N*-alkoxycarboxamides

### General procedures for the synthesis of *N*-alkoxycarboxamides<sup>7</sup>

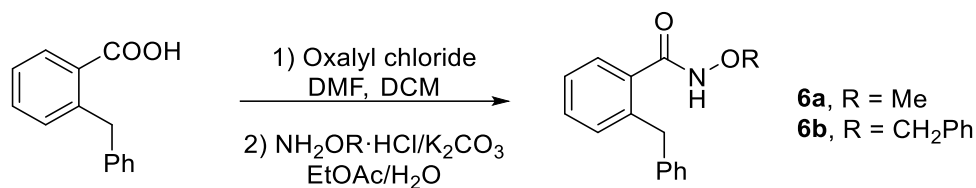

To a solution of the carboxylic acid (1.0 equiv) in dry DCM (0.3 M) at 0 °C under Ar was added dropwise oxalyl chloride (1.2 equiv) followed by a catalytic amount of dry DMF (2 drops). The reaction was allowed to stir at rt until completion. The solvent was then removed under reduced pressure to afford the corresponding crude acid chloride. Then the crude acid chloride dissolved in a minimum amount of EtOAc was added dropwise to a biphasic mixture of alkoxyamine hydrochloride (1.2 equiv) and  $\text{K}_2\text{CO}_3$  (2.0 equiv) in a 2:1 mixture of EtOAc (0.15 M) and  $\text{H}_2\text{O}$  (0.3 M) at 0 °C. The reaction was allowed to stir at rt overnight. Afterwards, the phases were separated and the aqueous phase was extracted twice with EtOAc. The combined organic layers were dried over  $\text{MgSO}_4$ , filtered, and evaporated under reduced pressure. The product was purified on silica gel by eluting with 25:75:1 EtOAc/ petroleum ether / $\text{NEt}_3$ .

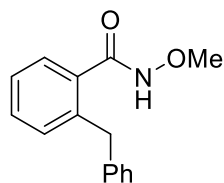

### 2-benzyl-*N*-methoxybenzamide (**6a**)<sup>8</sup>

White solid, 863 mg (71% yield, 5.0 mmol scale).  $^1\text{H NMR}$  (400 MHz,  $\text{CDCl}_3$ )  $\delta$  8.25 (s, 1H), 7.43-7.31 (m, 2H), 7.29-7.20 (m, 4H), 7.20-7.15 (m, 3H), 4.19 (s, 2H), 3.68 (s, 3H).  $^{13}\text{C NMR}$  (101 MHz,  $\text{CDCl}_3$ )  $\delta$  167.7, 140.5, 139.9, 132.8, 131.2, 130.8, 129.0, 128.5, 127.7, 126.4, 126.2, 64.5, 38.8.

**HRMS** (ESI)  $m/z$  calcd for  $\text{C}_{15}\text{H}_{16}\text{NO}_2$  [ $\text{M}+\text{H}$ ]<sup>+</sup> 242.1176, found 242.1176.

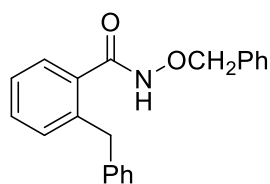

## 2-benzyl-N-(benzyloxy)benzamide (6b)<sup>9</sup>

White solid, 1.17 g (75% yield, 5.0 mmol scale). <sup>1</sup>H NMR (400 MHz, CDCl<sub>3</sub>) δ 8.28 (s, 1H), 7.36-7.27 (m, 6H), 7.26-7.21 (m, 3H), 7.20-7.10 (m, 5H), 4.85 (s, 2H), 4.14 (s, 2H). <sup>13</sup>C NMR (101 MHz, CDCl<sub>3</sub>) δ 167.4, 140.3, 139.8, 135.1, 132.7, 130.9, 130.6, 129.1, 129.0, 128.6, 128.4, 128.3, 127.5, 126.1, 126.0, 78.0, 38.4.

HRMS (ESI) m/z calcd for C<sub>21</sub>H<sub>20</sub>NO<sub>2</sub> [M+H]<sup>+</sup> 318.1489, found 318.1491.

## General procedures for the lactamization of N-alkoxycarboxamides

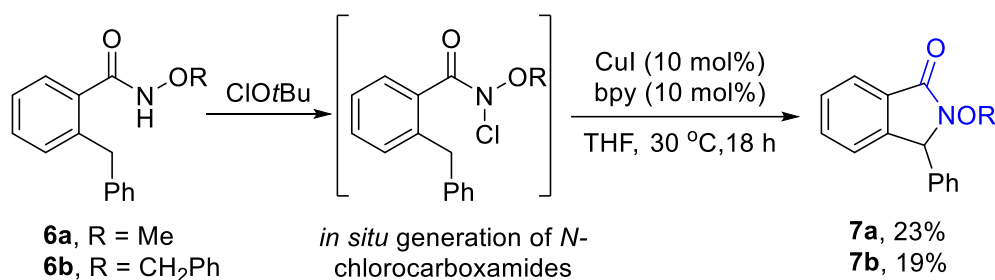

To a stirred solution of a N-alkoxyamide (0.4 mmol) in CH<sub>2</sub>Cl<sub>2</sub> (2 mL) in an oven-dried resealable Schlenk tube was added slowly *tert*-butyl hypochlorite (0.44 mmol) with cooling. The reaction mixture was stirred at 0 °C in the dark until the reaction was complete (the time required was generally less than 20 min). The solvent was evaporated at rt under reduced pressure. Under argon atmosphere, CuI (0.040 mmol, 10 mol%), bpy (0.040 mmol, 10 mol%), and anhydrous THF (2.0 mL) were added into the Schlenk tube and the reaction mixture was stirred at 30 °C for 18 h. The precipitate was filtered off and washed by DCM. The filtrate was evaporated and the residue was purified by column chromatography on silica gel to afford the desired product.

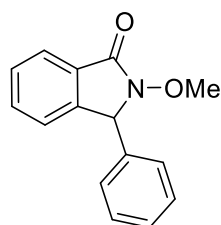

## 2-methoxy-3-phenylisoindolin-1-one (7a)<sup>8</sup>

White solid, 21.9 mg (23% yield), mp: 126-129 °C. <sup>1</sup>H NMR (400 MHz, CDCl<sub>3</sub>) δ 7.79-7.68 (m, 1H), 7.46-7.40 (m, 2H), 7.37-7.34 (m, 2H), 7.28-7.25 (m, 2H), 7.21-7.14 (m, 2H), 6.50 (s, 1H), 3.96 (s, 3H). <sup>13</sup>C NMR (101 MHz, CDCl<sub>3</sub>) δ 156.1, 144.4, 137.6,

131.1, 129.4, 129.3, 129.0, 128.9, 128.4, 128.4, 127.5, 122.5, 121.6, 87.8, 62.8.

**HRMS** (ESI)  $m/z$  calcd for  $C_{15}H_{13}NO_2Na$   $[M+Na]^+$  262.0838, found 262.0833.

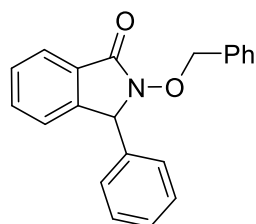

### **2-(benzyloxy)-3-phenylisoindolin-1-one (7b)**

White solid, 23.8 mg (19% yield), mp: 135-138 °C.  **$^1H$  NMR** (400 MHz,  $CDCl_3$ )  $\delta$  7.76-7.67 (m, 1H), 7.49-7.43 (m, 2H), 7.40 -7.31 (m, 7H), 7.27 (m, 3H), 7.19-7.02 (m, 1H), 6.50 (s, 1H), 5.16 (s, 2H).  **$^{13}C$  NMR** (101 MHz,  $CDCl_3$ )  $\delta$  156.4, 144.5, 138.0, 137.8, 131.0, 129.2, 128.9, 128.8, 128.5, 128.4, 128.3, 127.8, 127.4, 122.4, 121.8, 87.7, 77.5.

**HRMS** (ESI)  $m/z$  calcd. for  $C_{21}H_{18}NO_2$   $[M+H]^+$  316.1332, found 316.1337.

### **Supplementary references:**

1. B. J. Groendyke, D. I. AbuSalim and S. P. Cook, *J. Am. Chem. Soc.*, 2016, **138**, 12771-12774.
2. D. Wang, L. Wu, F. Wang, X. Wan, P. Chen, Z. Lin and G. Liu, *J. Am. Chem. Soc.*, 2017, **139**, 6811-6814.
3. H.-C. Liu, Y. Li, X.-P. Gong, Z.-J. Niu, Y.-Z. Wang, M. Li, W.-Y. Shi, Z. Zhang and Y.-M. Liang, *Org. Lett.*, 2021, **23**, 2693-2698.
4. Z.-H. Zhang, X.-Y. Dong, X.-Y. Du, Q.-S. Gu, Z.-L. Li and X.-Y. Liu, *Nat. Commun.*, 2019, **10**, 5689.
5. Y. Man, S. Liu, B. Xu and X. Zeng, *Org. Lett.*, 2022, **24**, 944-948.
6. X. Zeng, W. Yan, M. Paeth, S. B. Zacate, P.-H. Hong, Y. Wang, D. Yang, K. Yang, T. Yan, C. Song, Z. Cao, M.-J. Cheng and W. Liu, *J. Am. Chem. Soc.*, 2019, **141**, 19941-19949.
7. C. Zhu, Y. Liang, X. Hong, H. Sun, W.-Y. Sun, K. N. Houk and Z. Shi, *J. Am. Chem. Soc.*, 2015, **137**, 7564-7567.

8. D.-M. Yan, Q.-Q. Zhao, L. Rao, J.-R. Chen and W.-J. Xiao, *Chem. Eur. J.*, 2018, **24**, 16895-16901.

9. K. Nozawa-Kumada, Y. Matsuzawa, K. Ono, M. Shigeno and Y. Kondo, *Chem. Commun.*, 2021, **57**, 8604-8607.

# NMR spectra

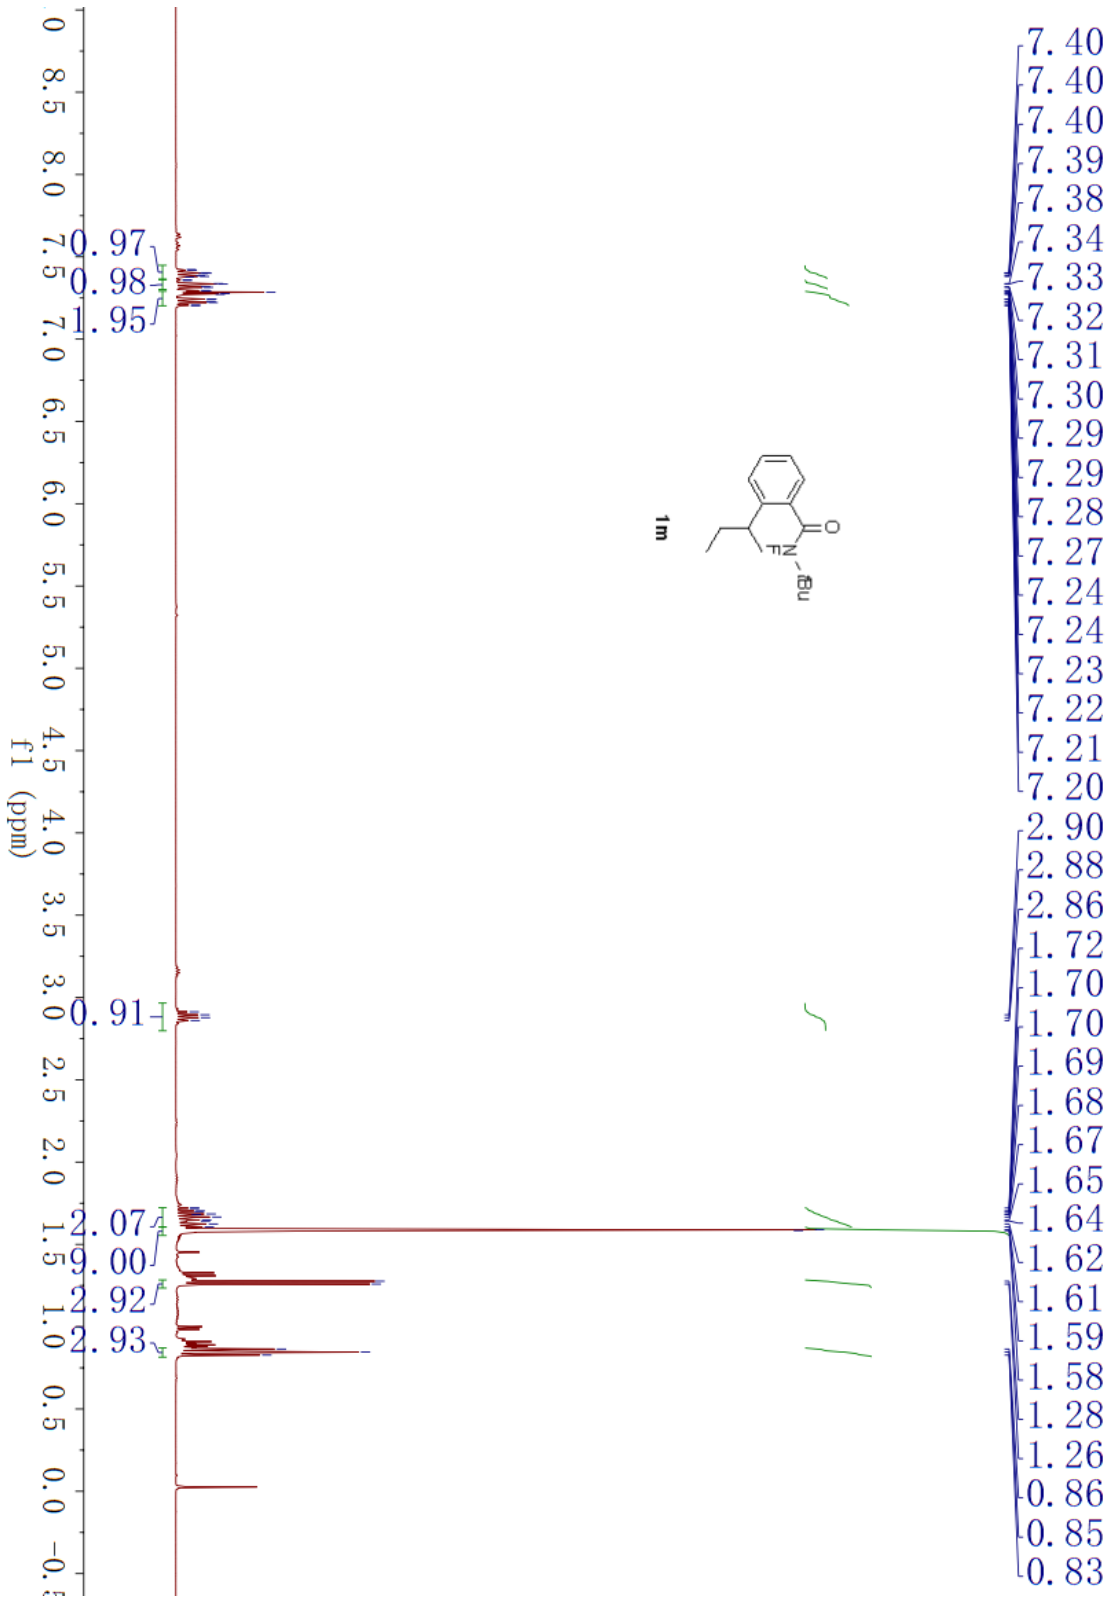

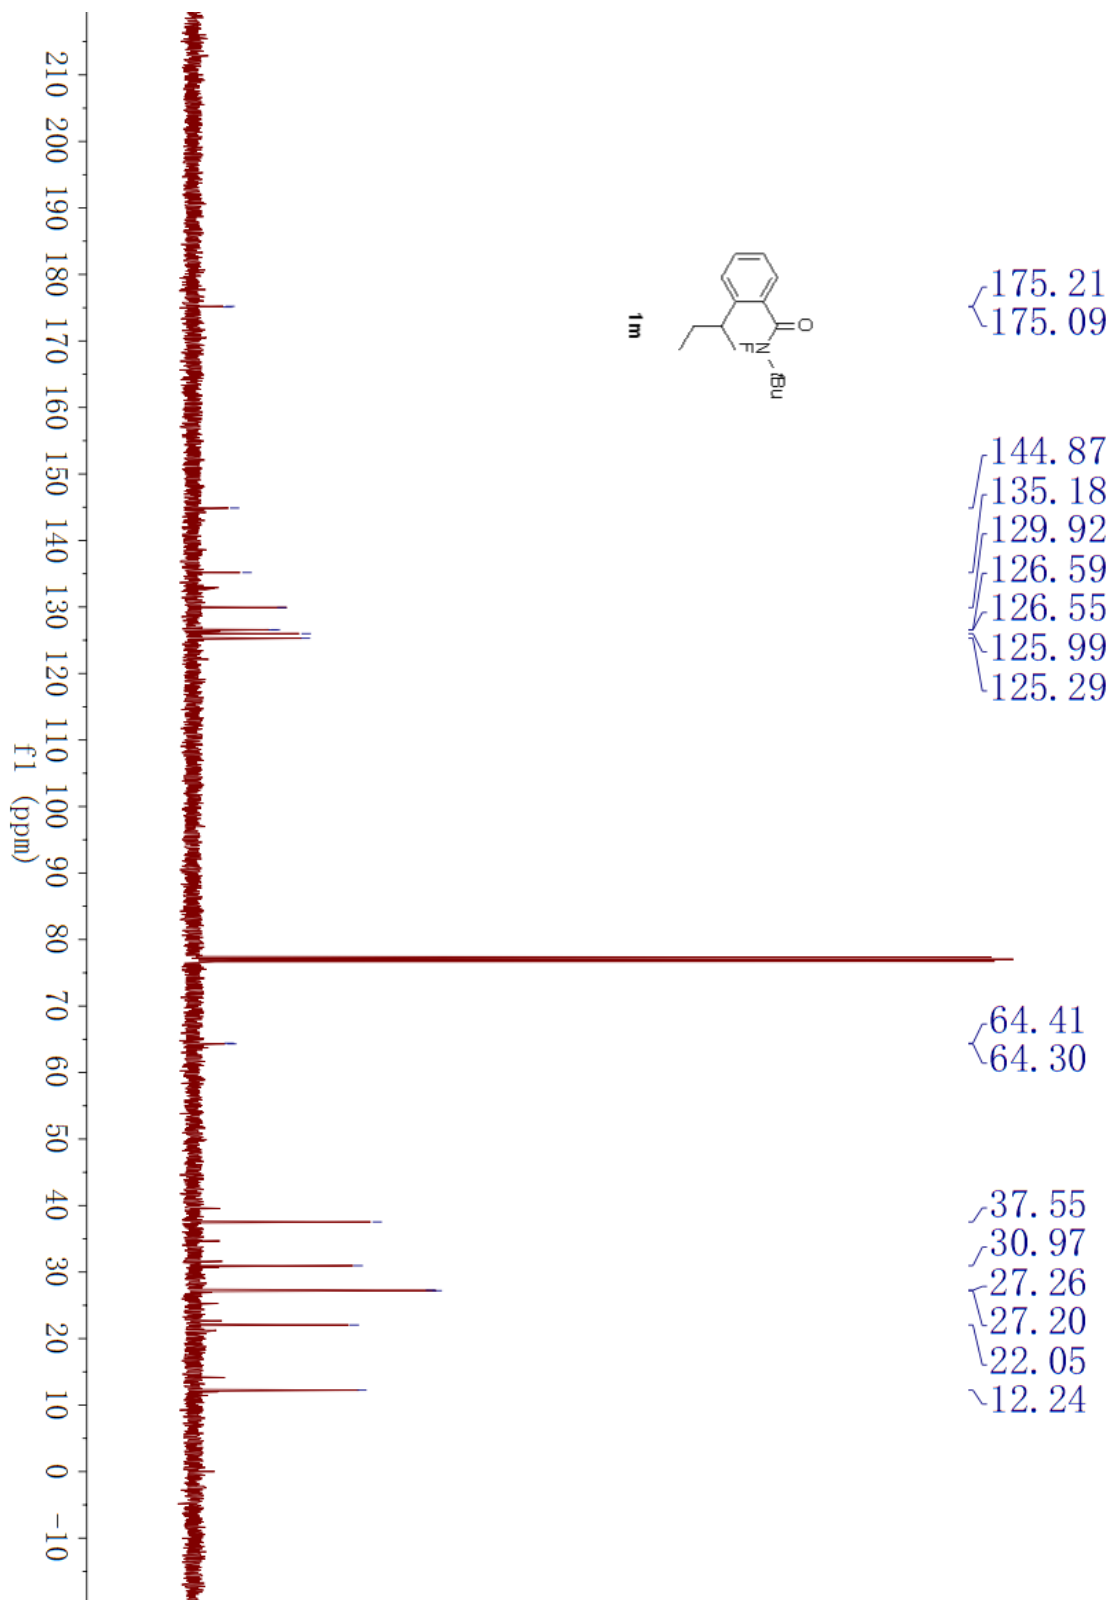

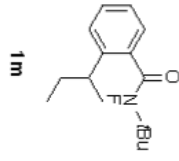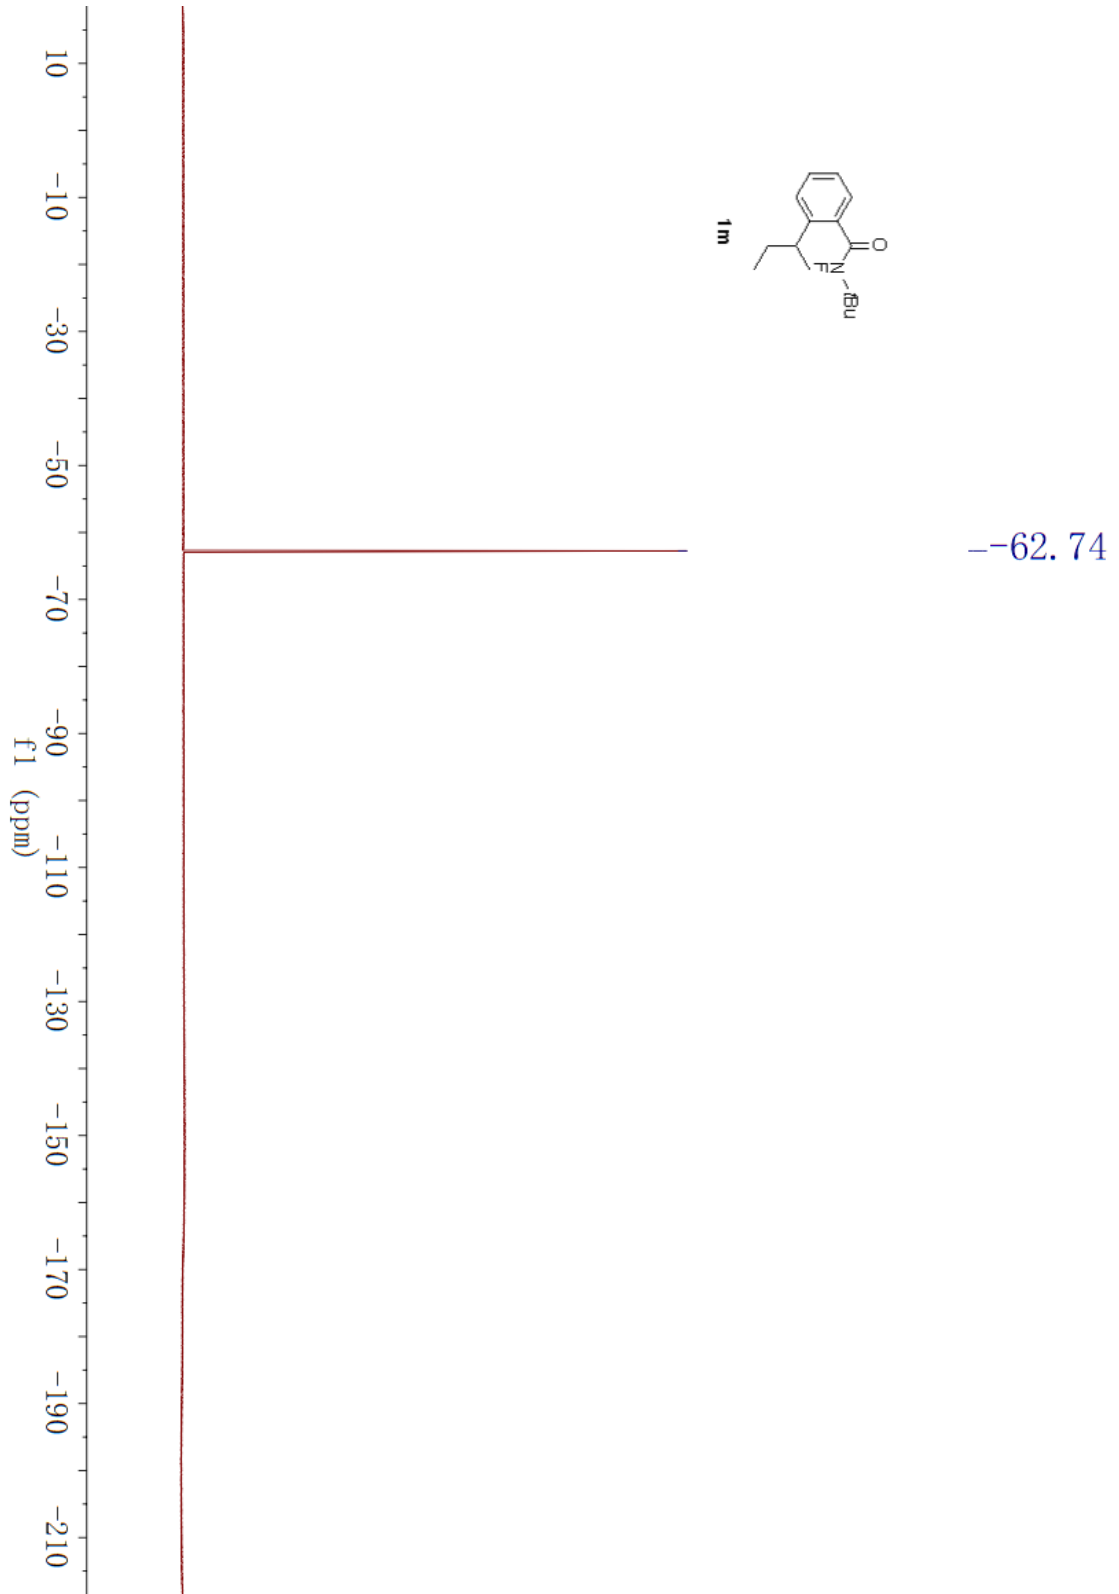

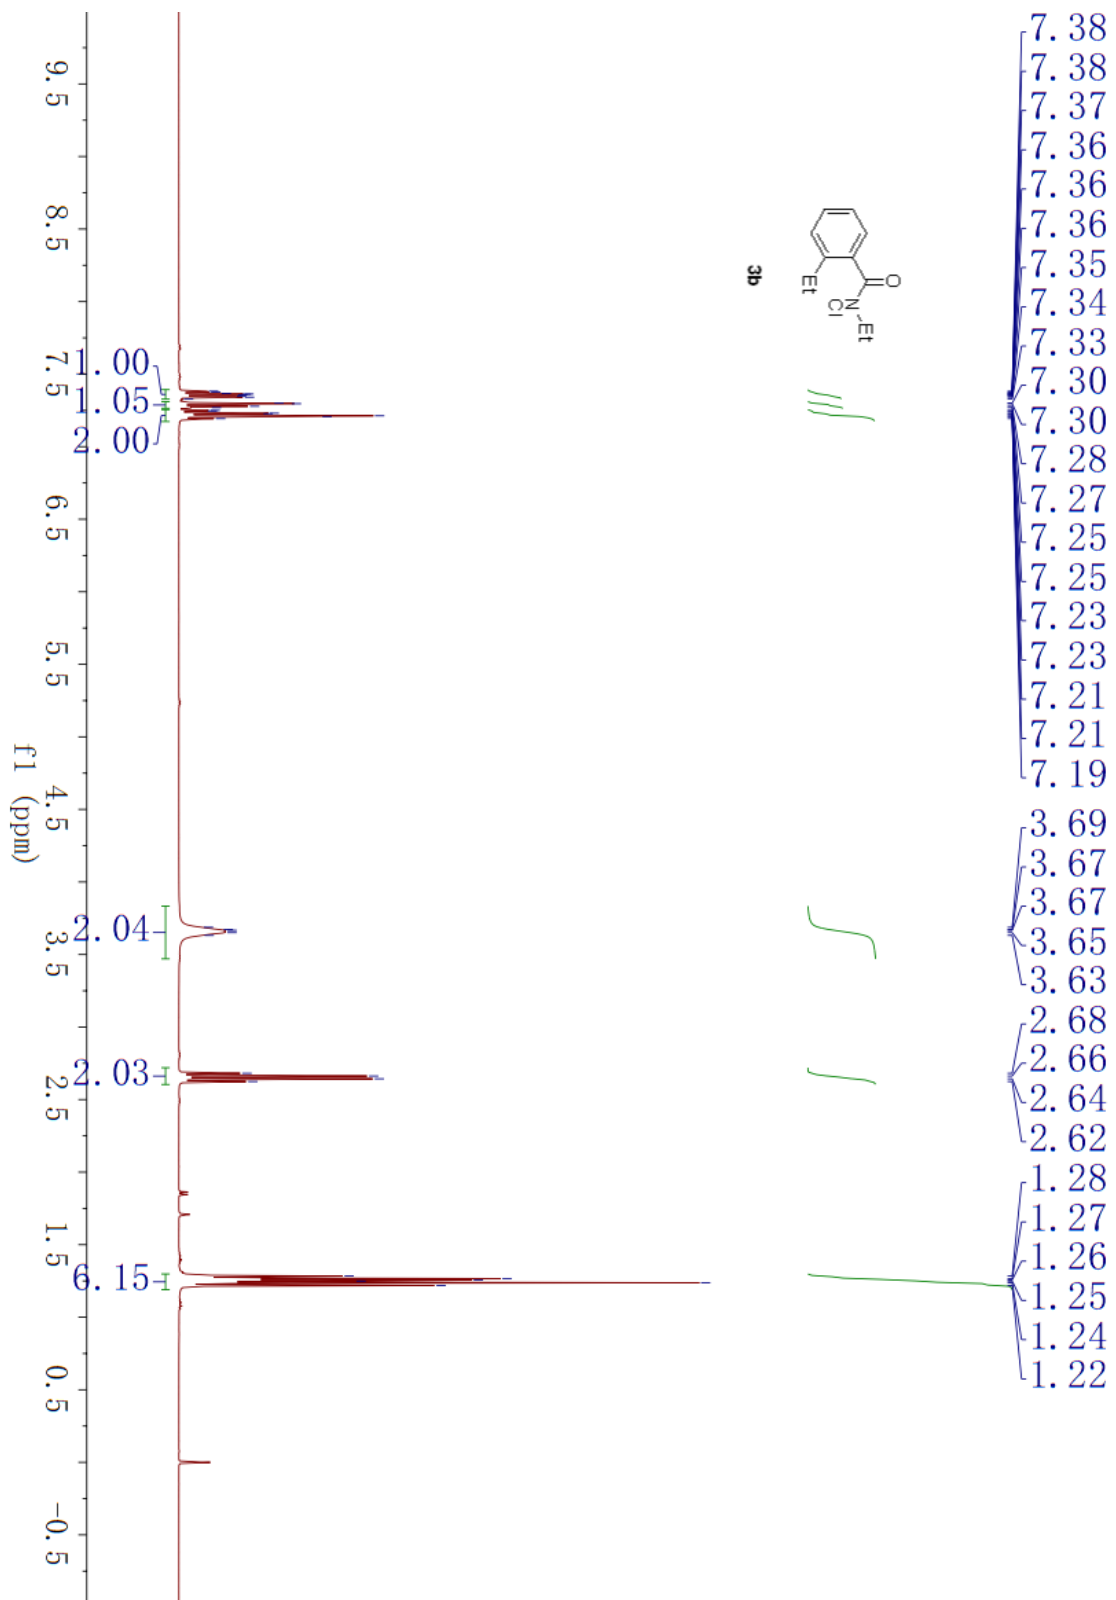



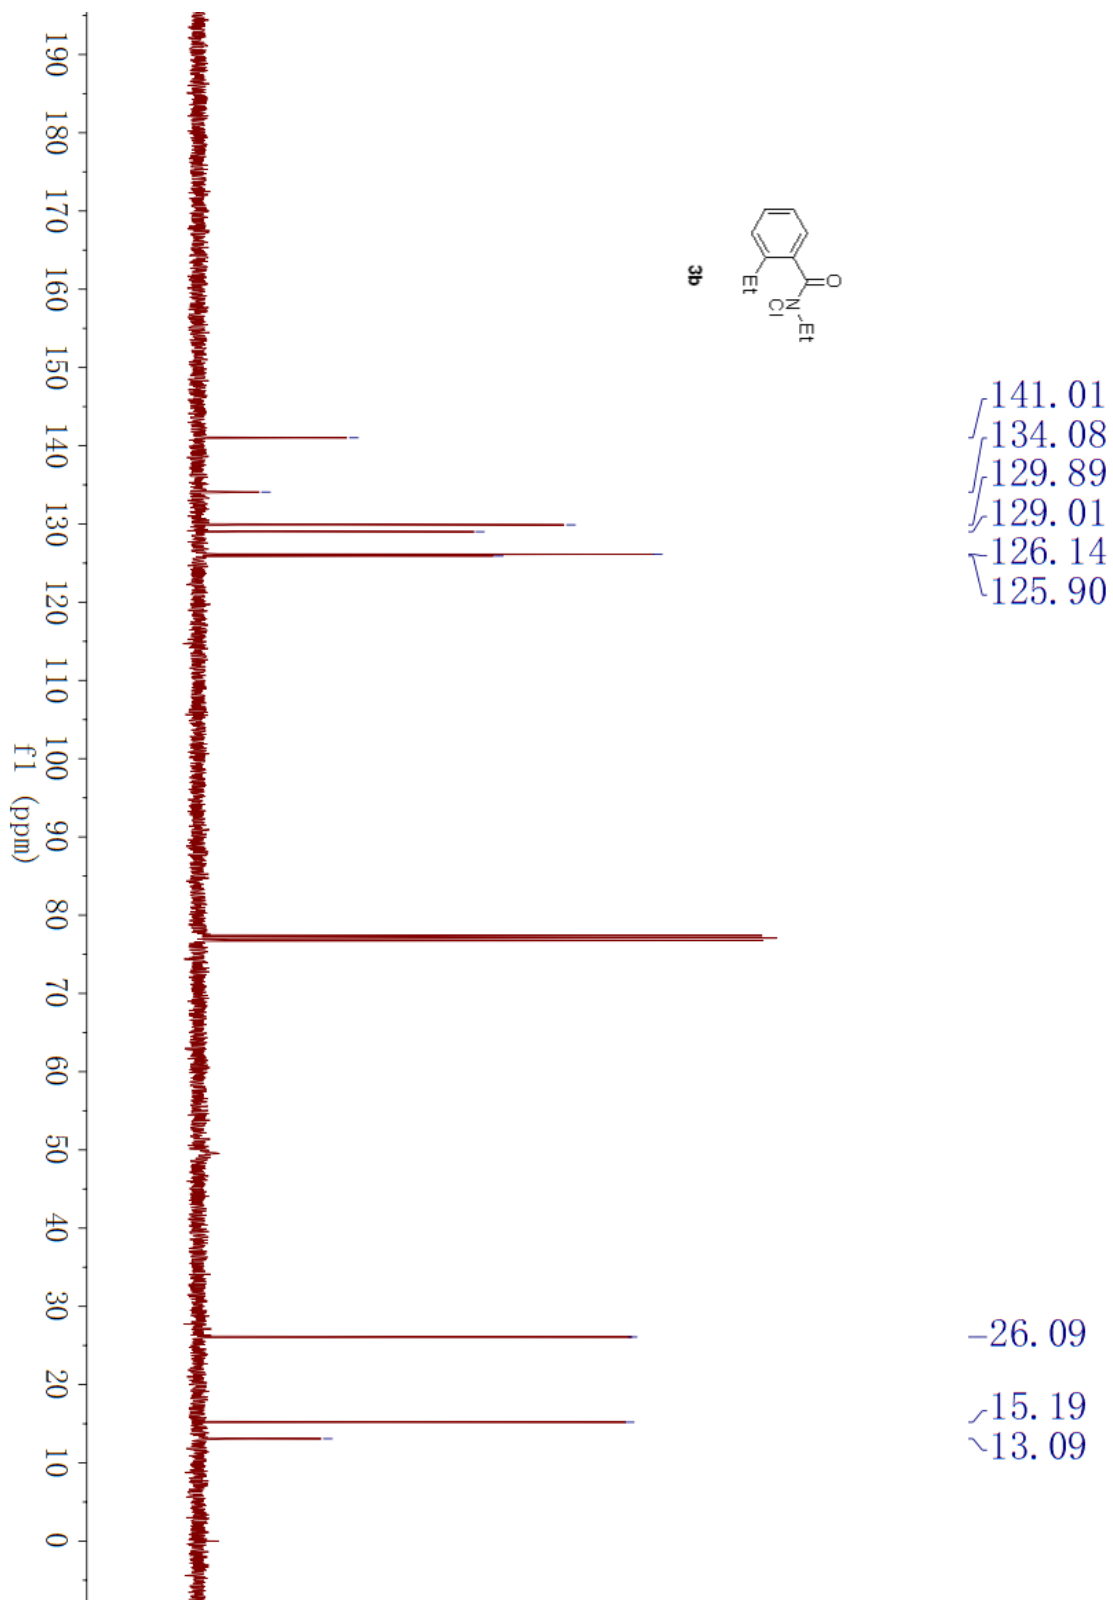



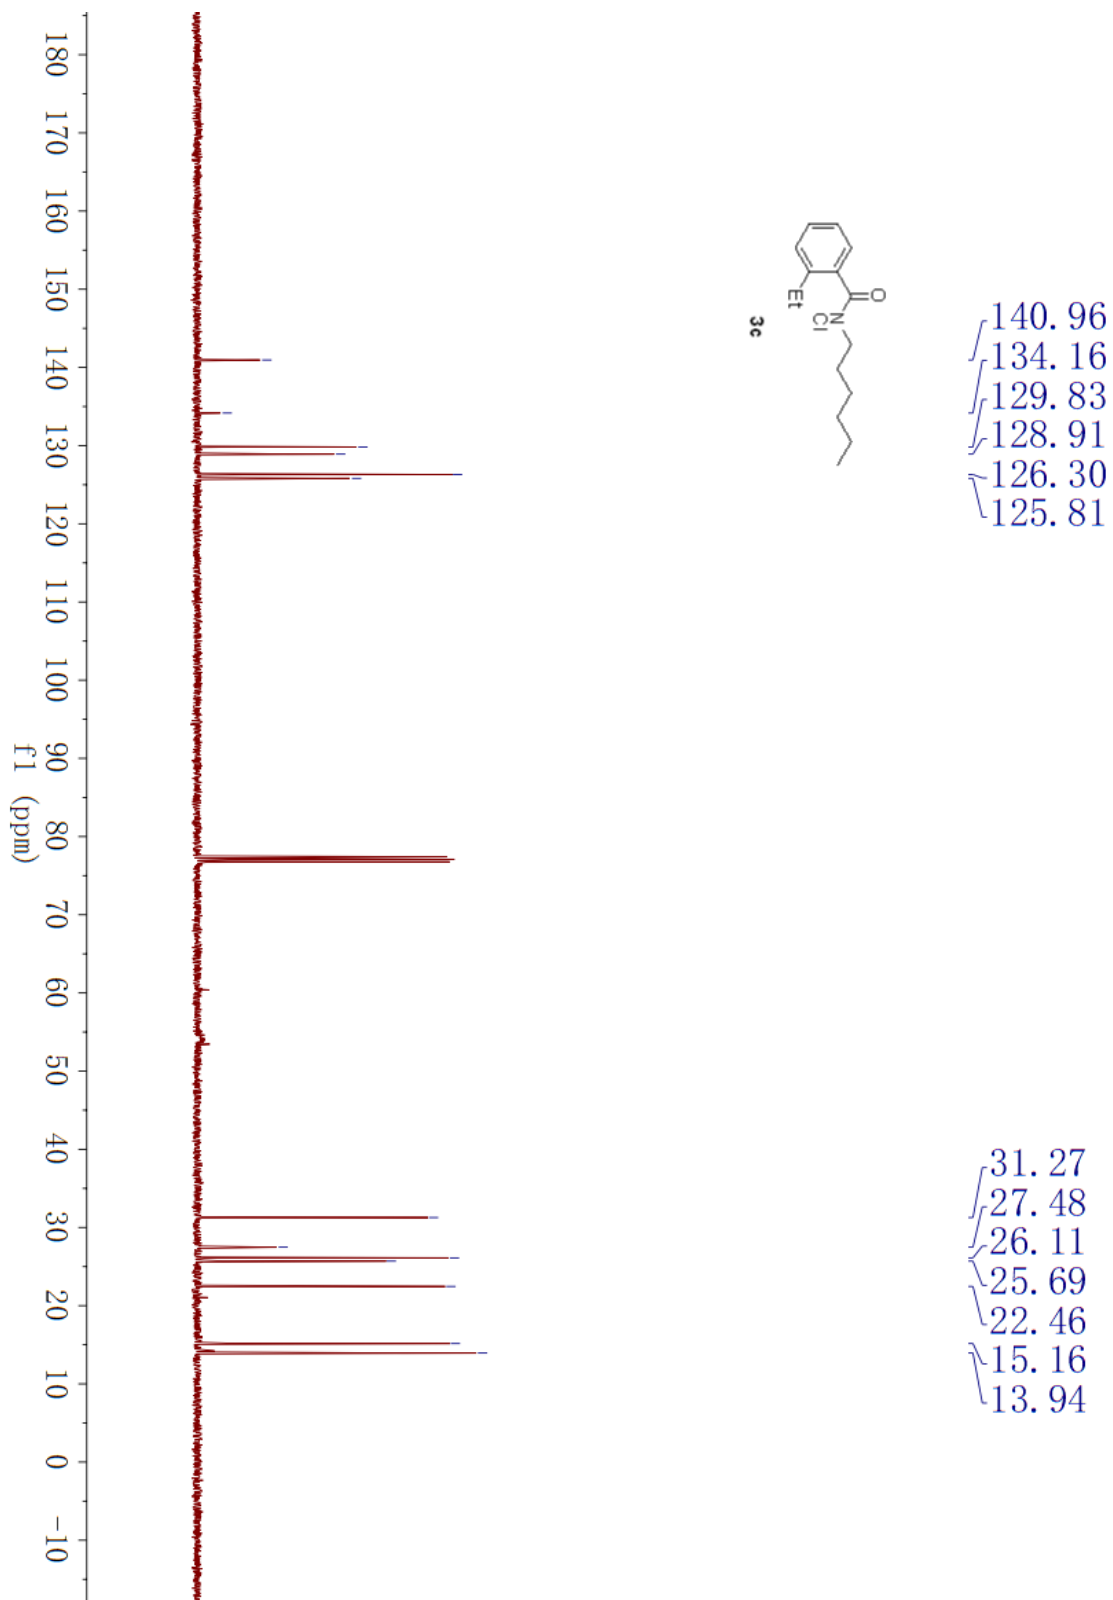

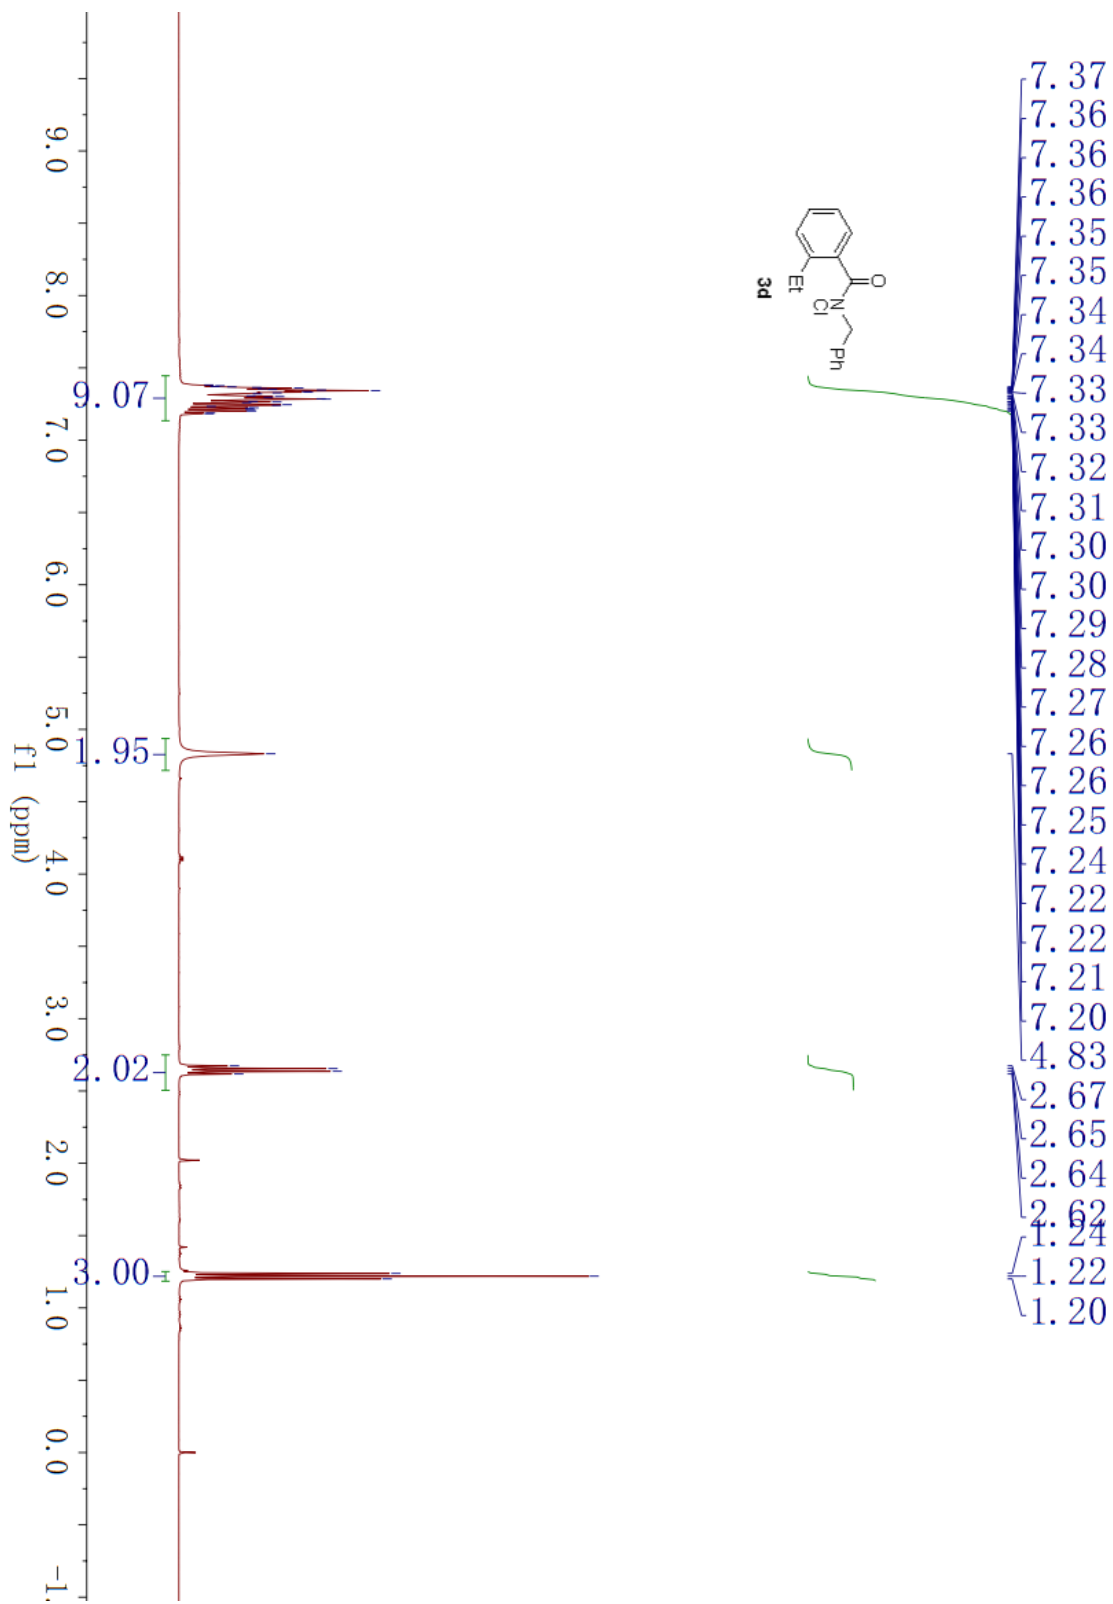

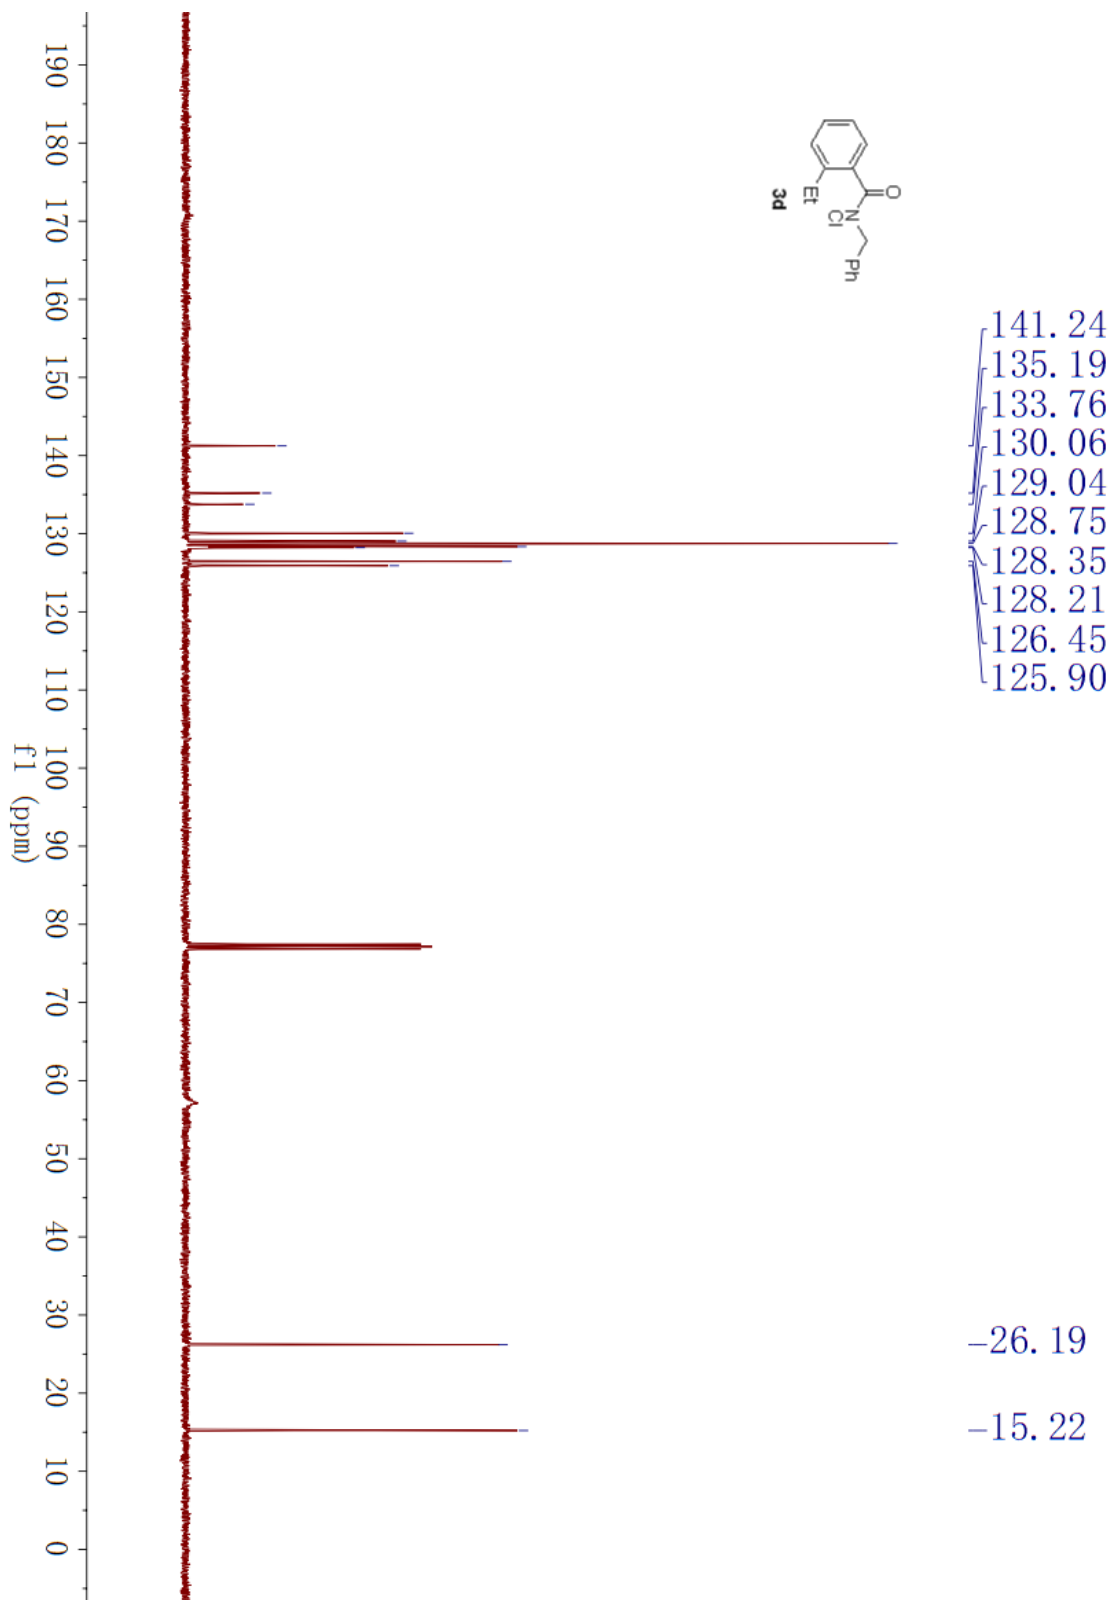

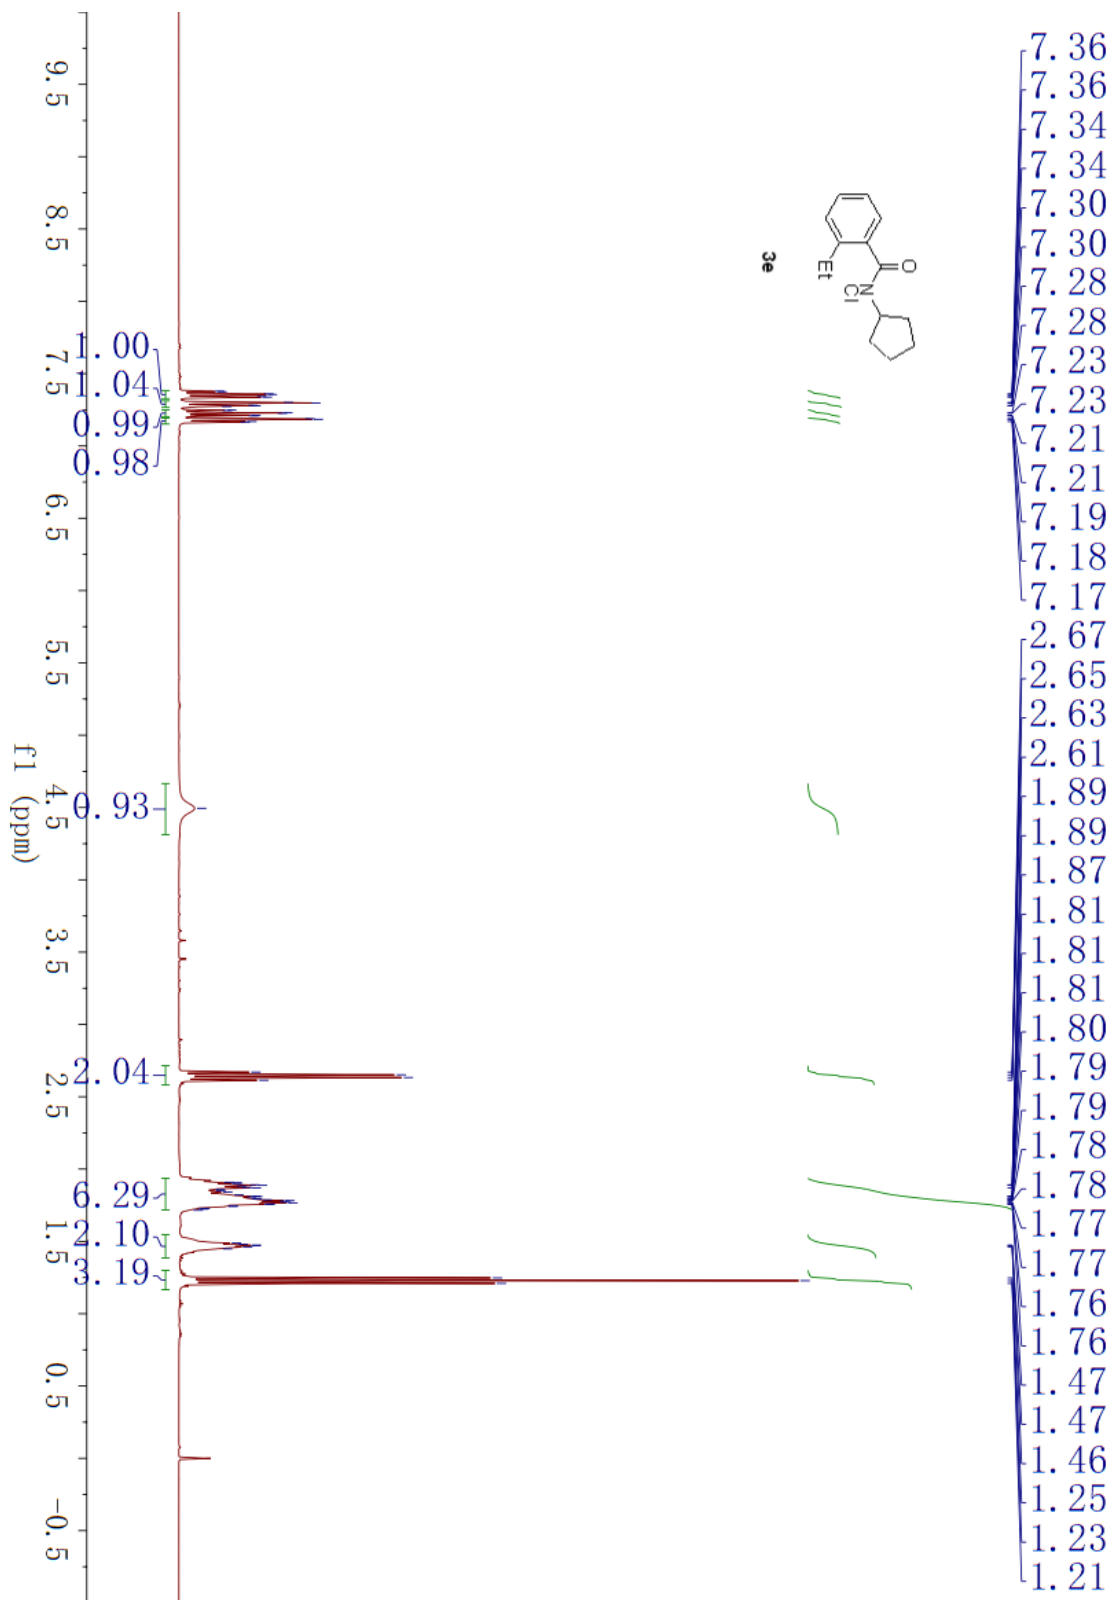

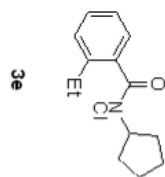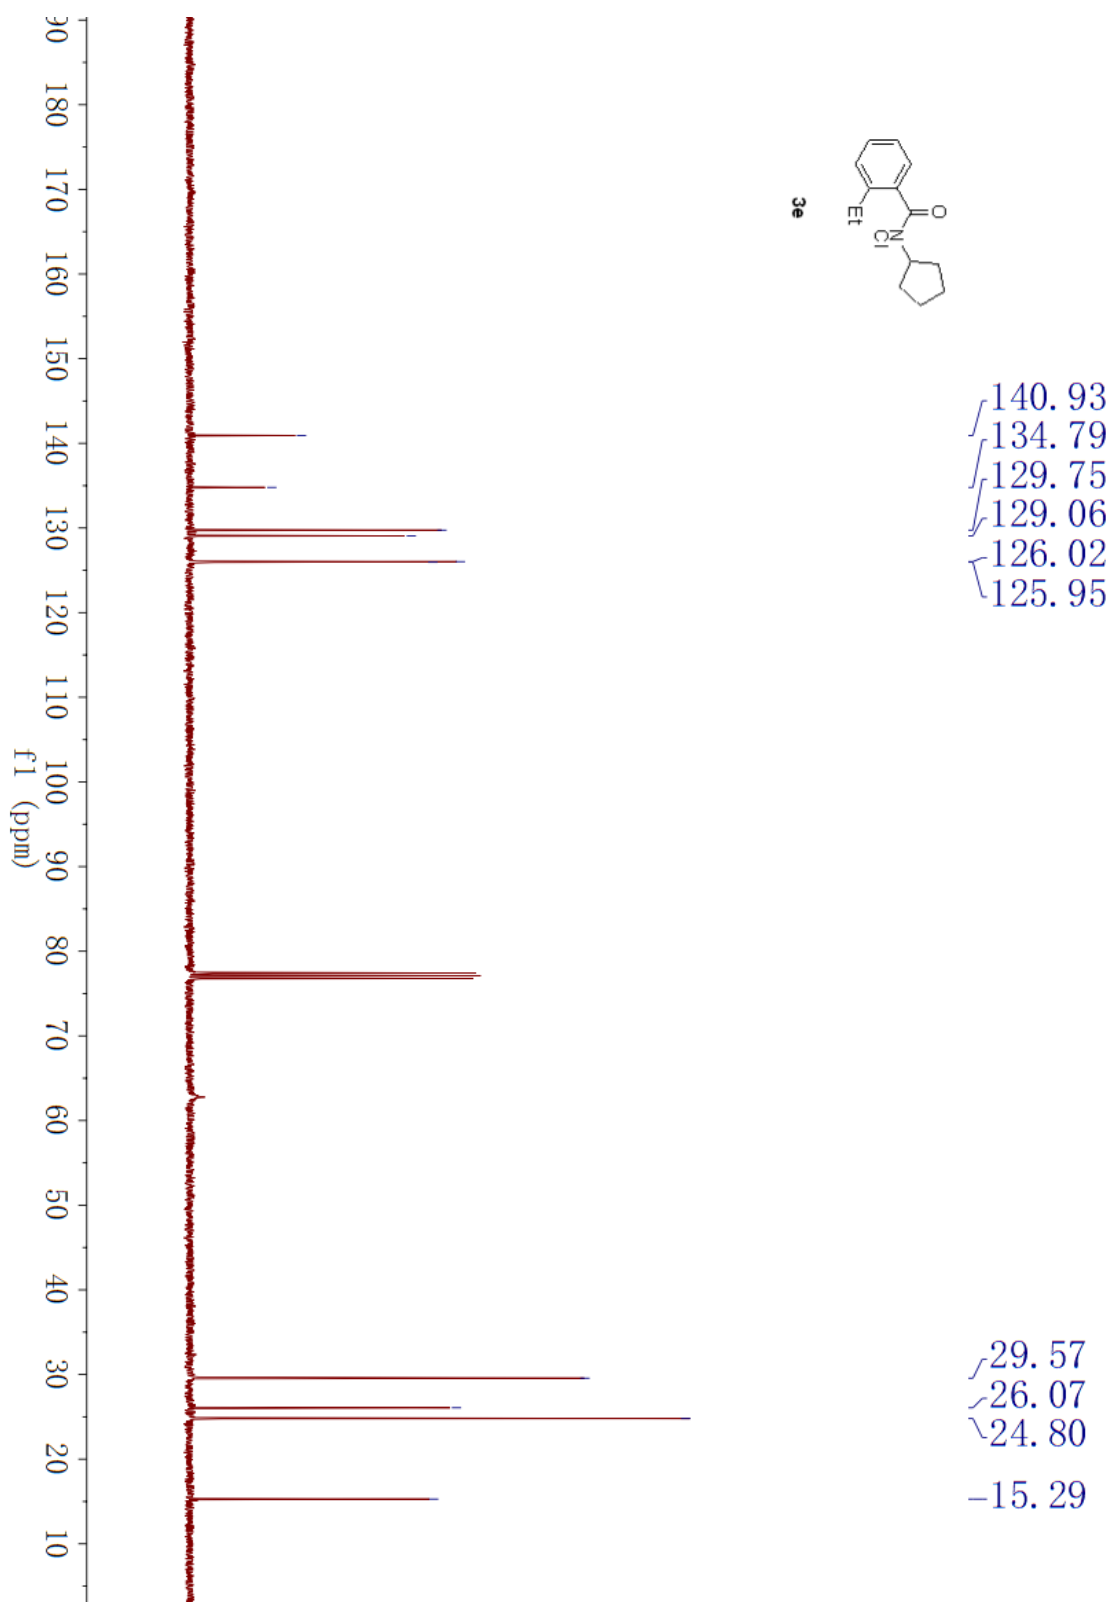

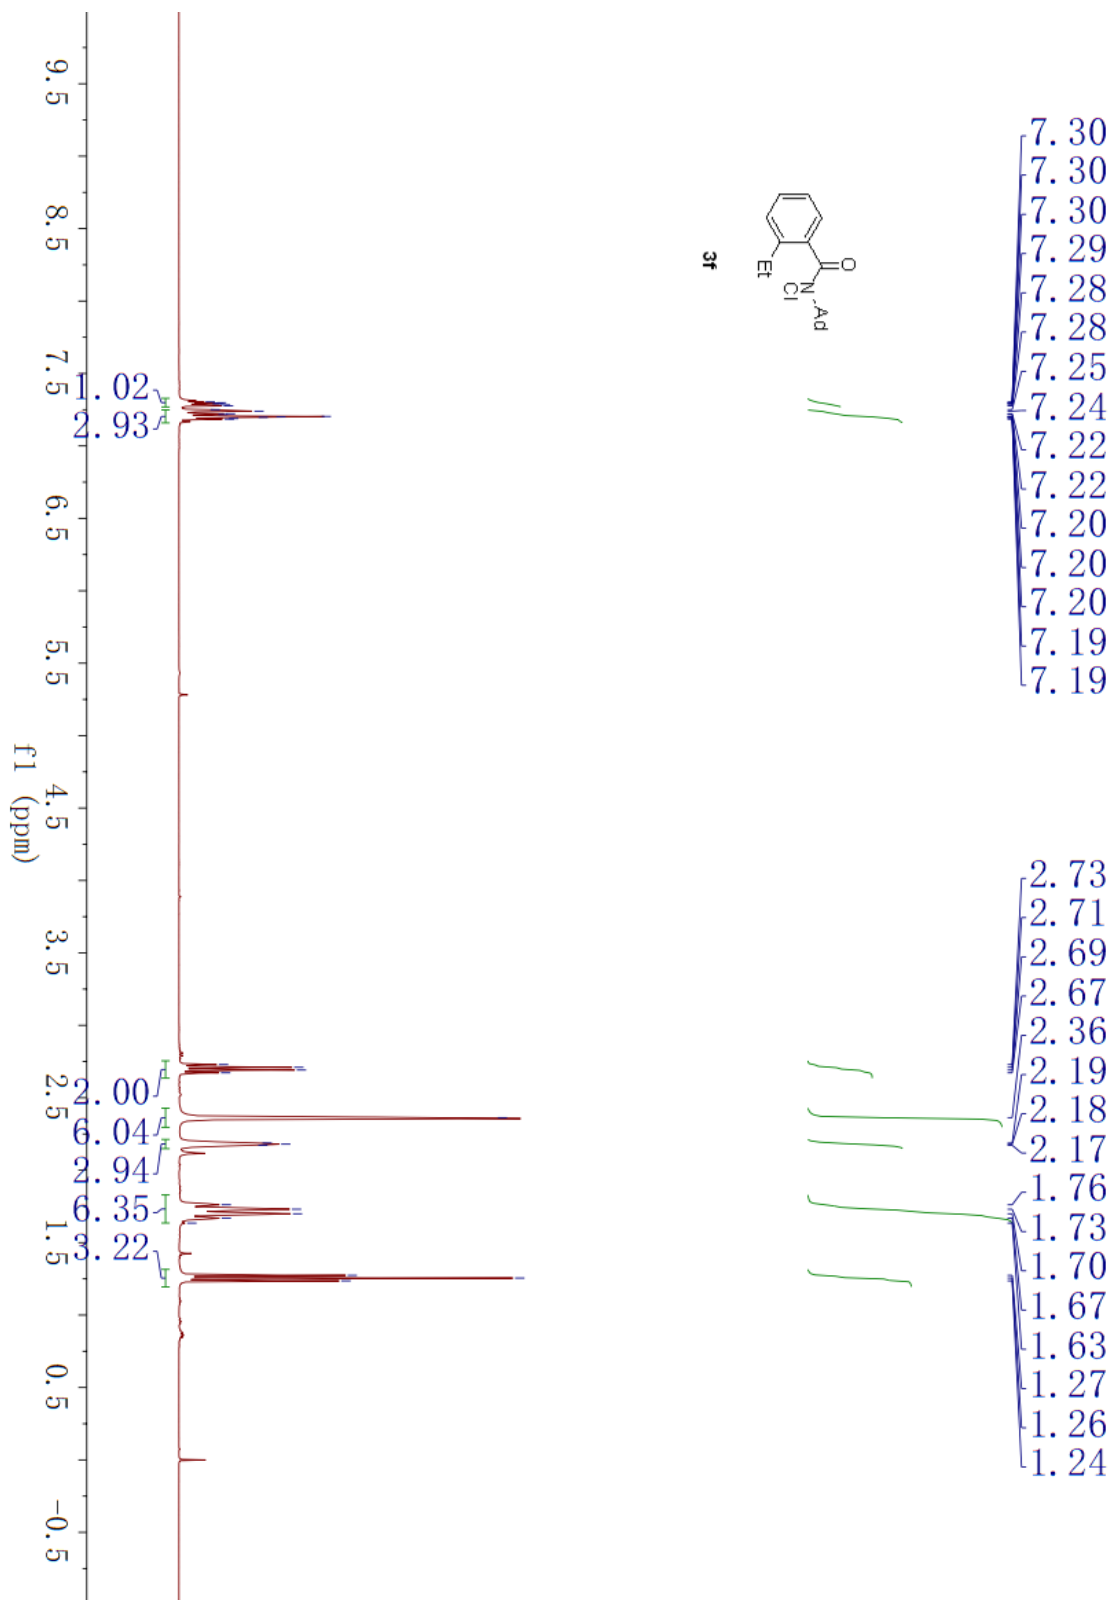



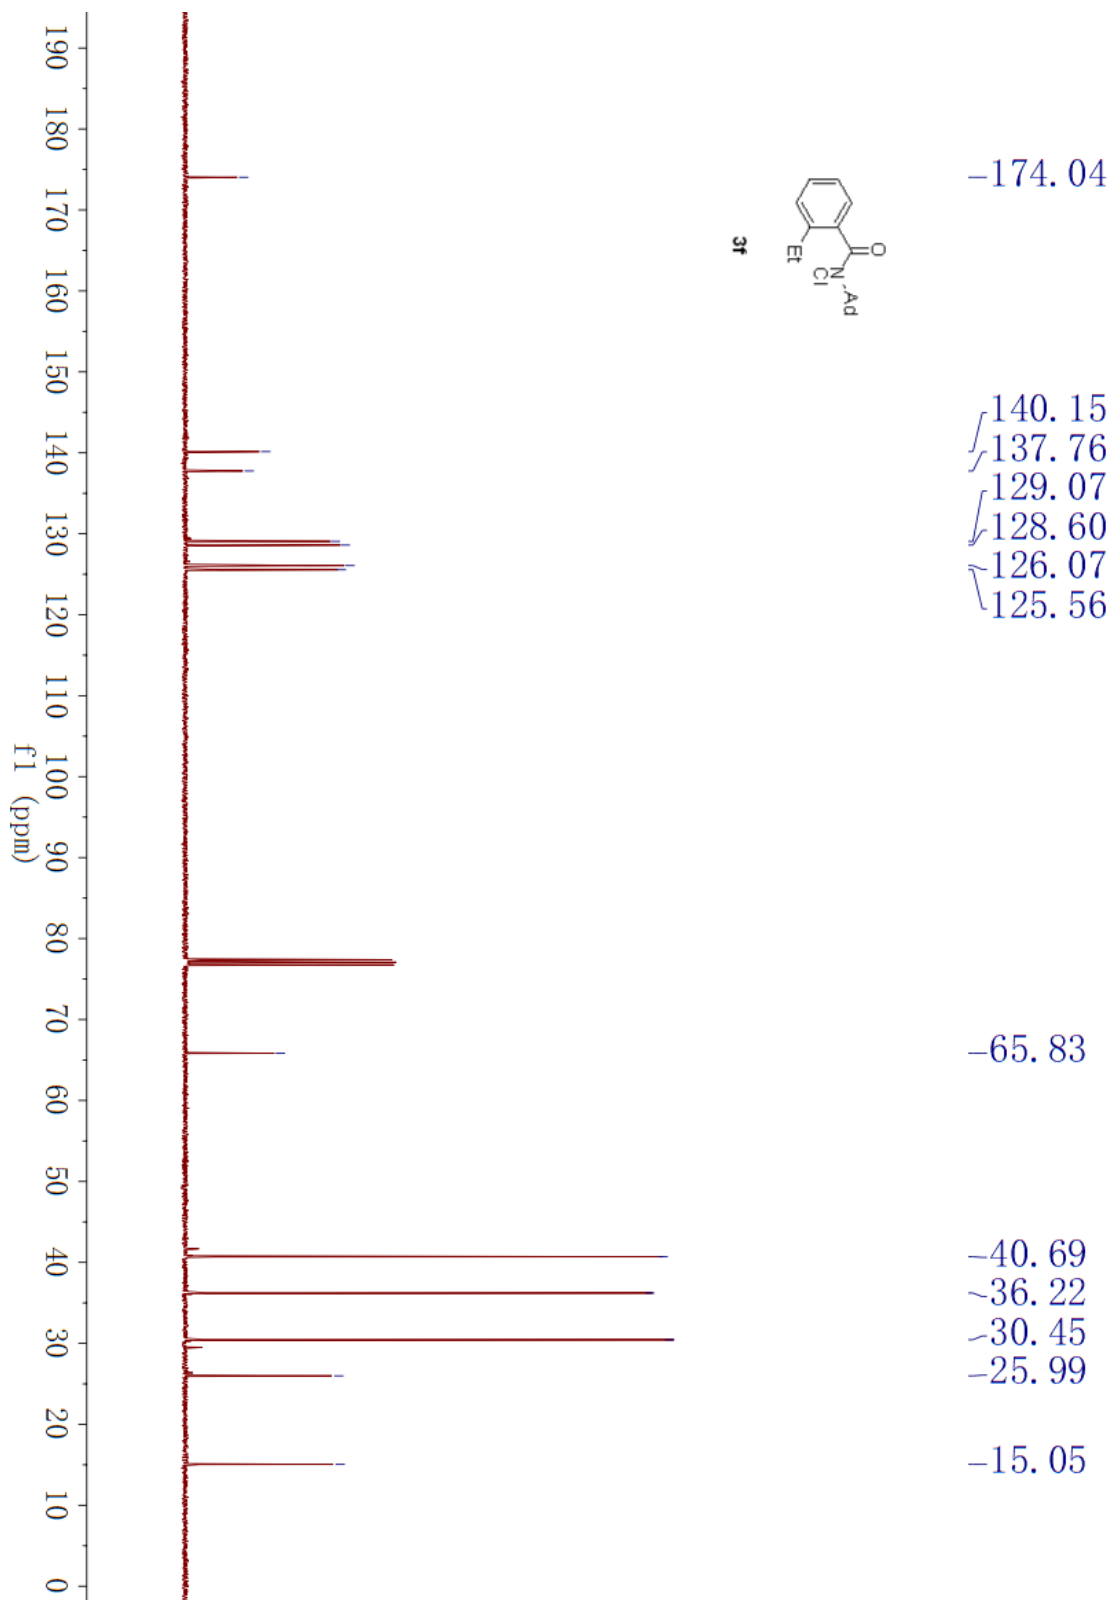

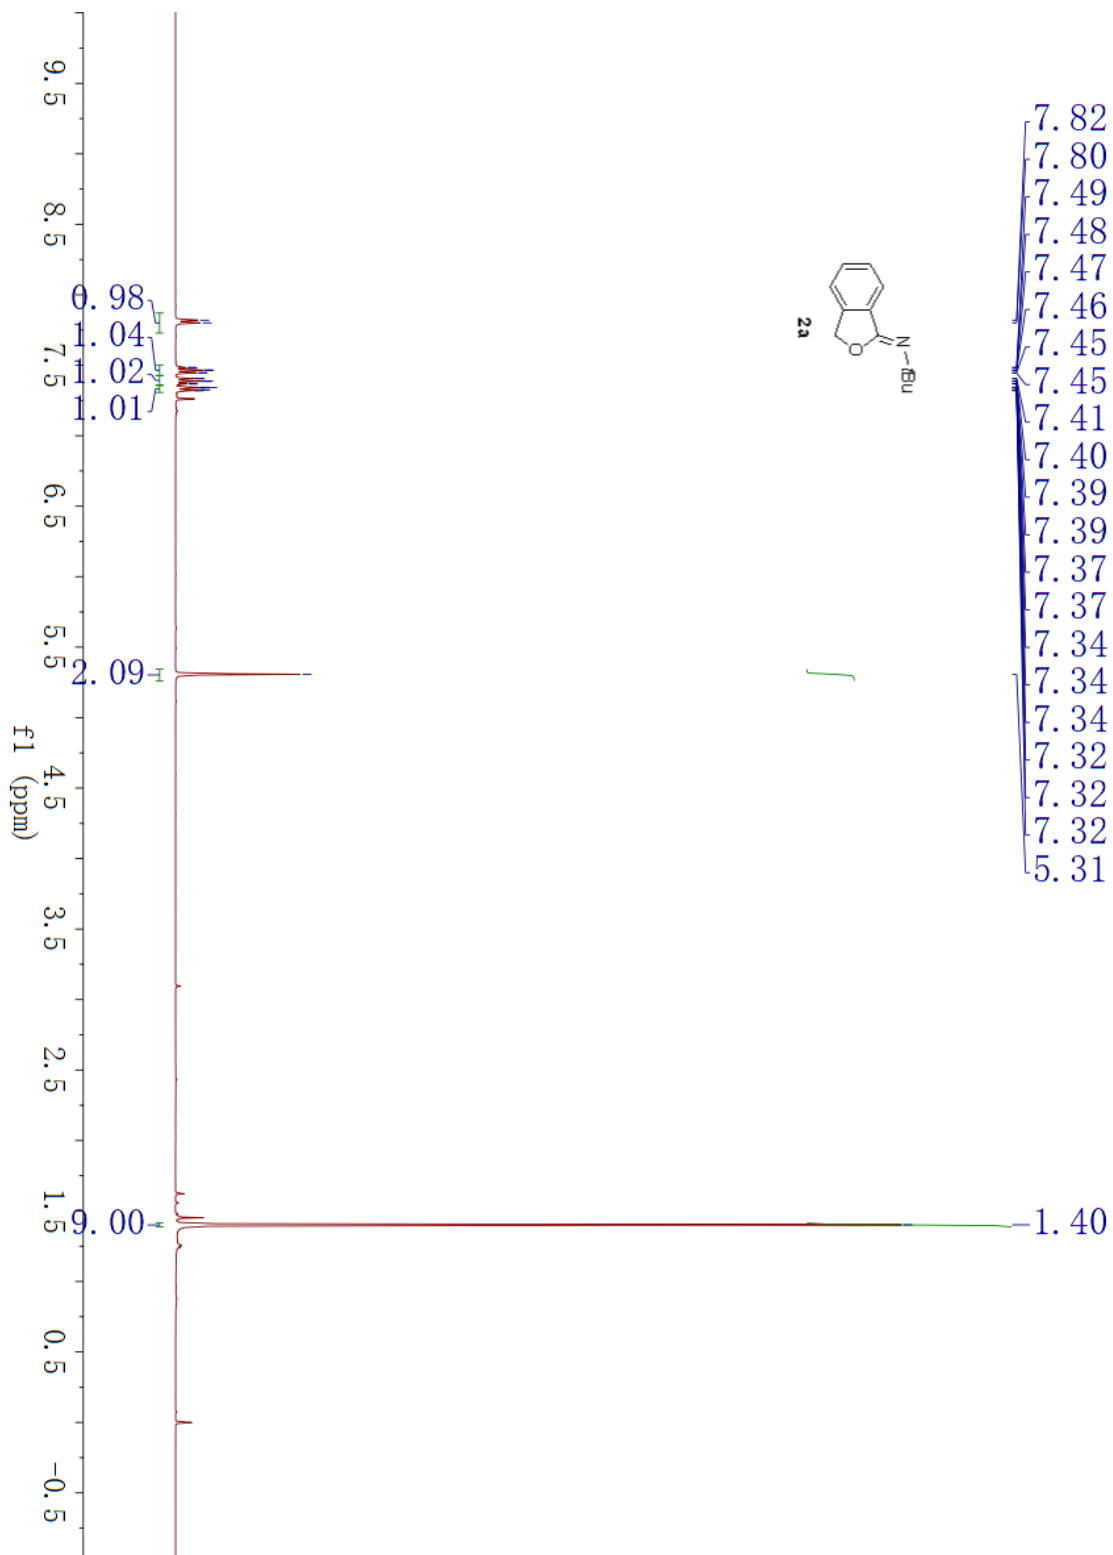

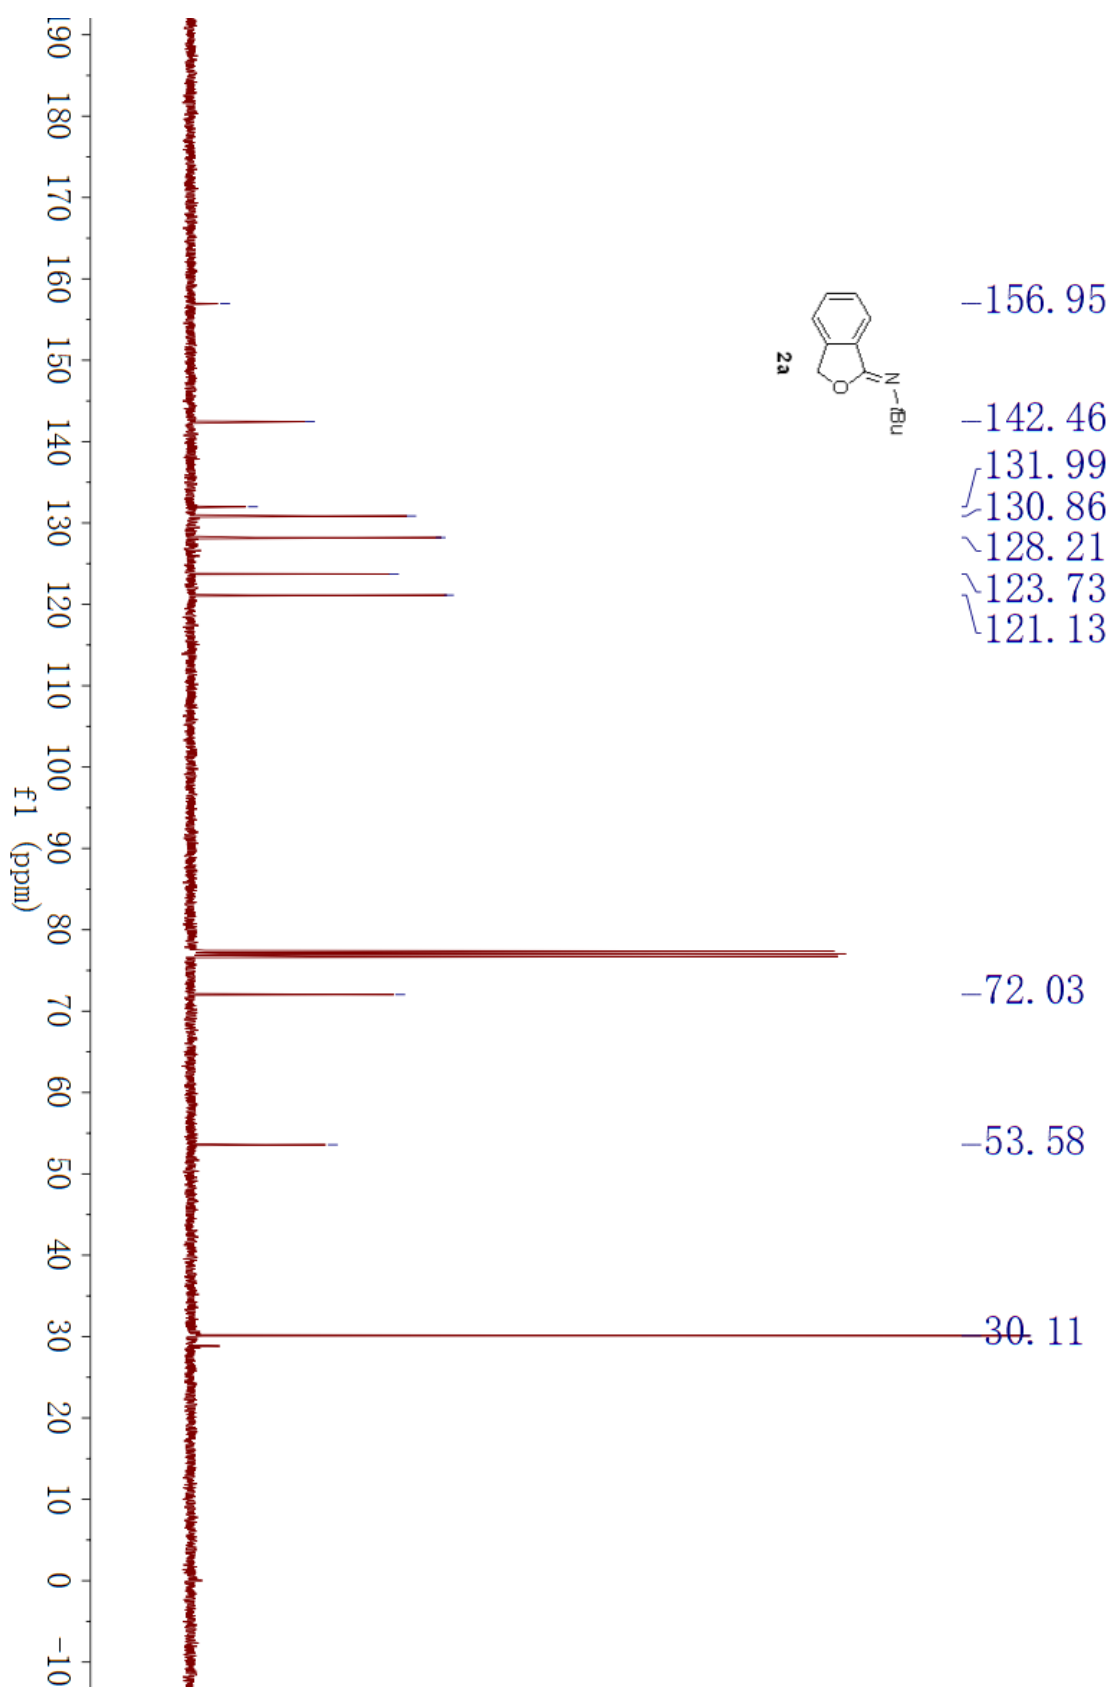

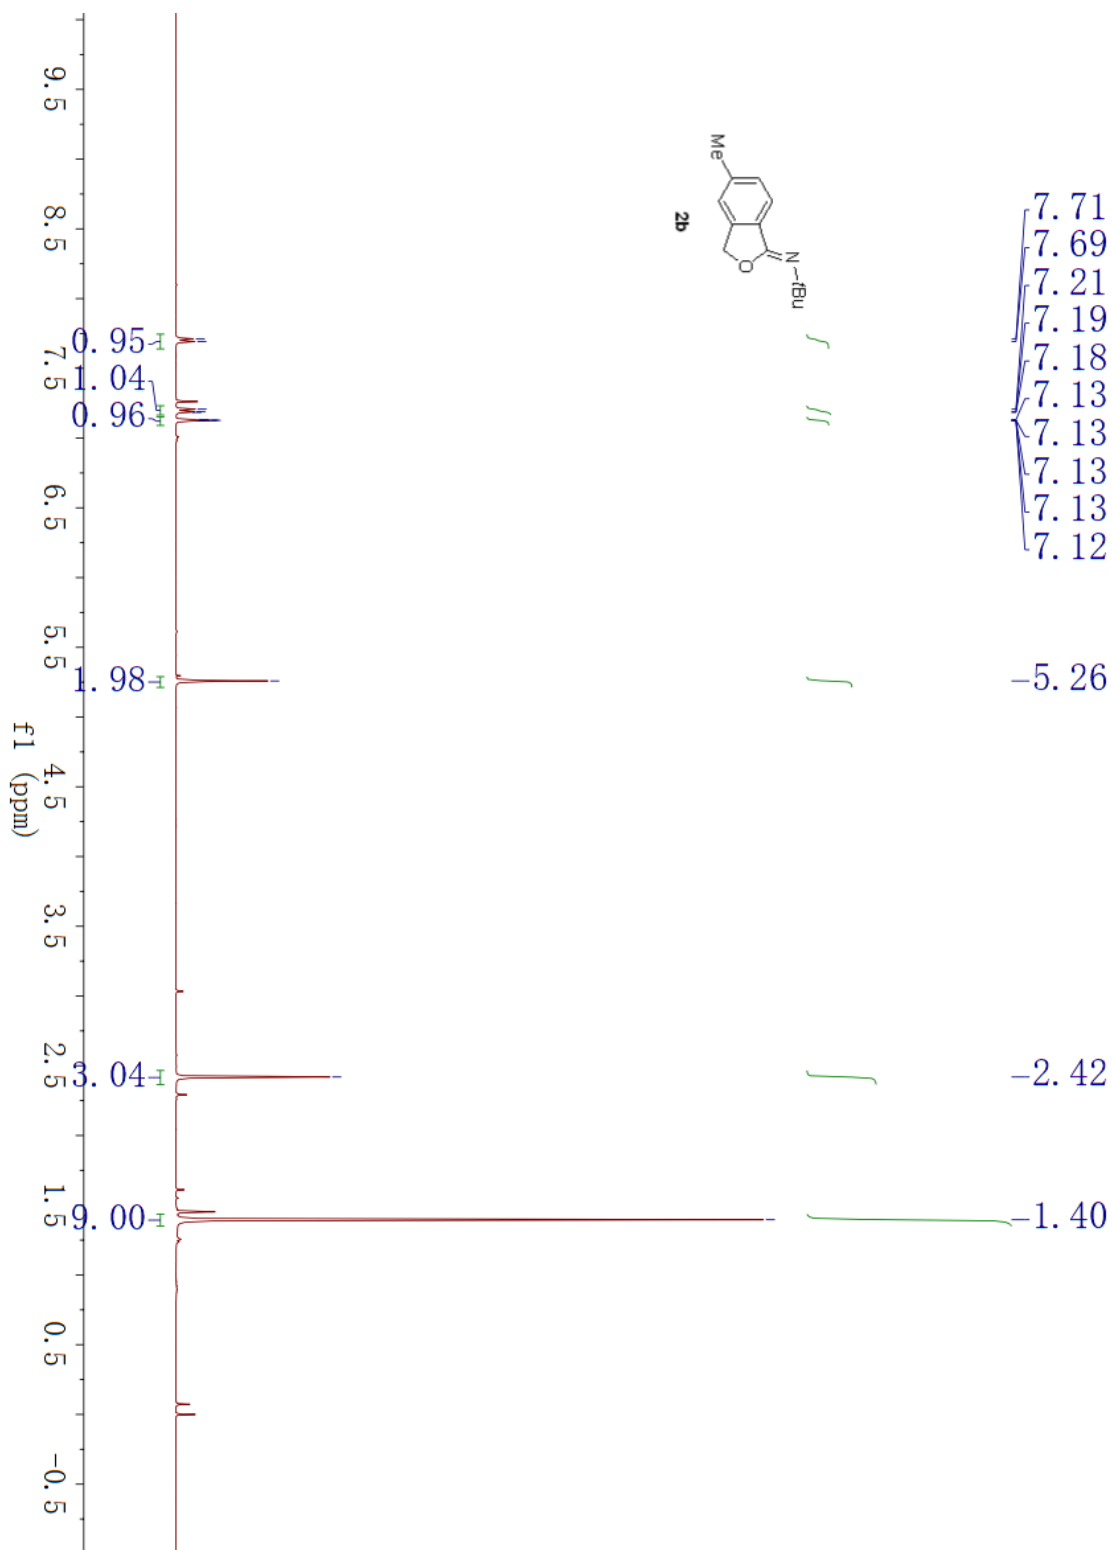

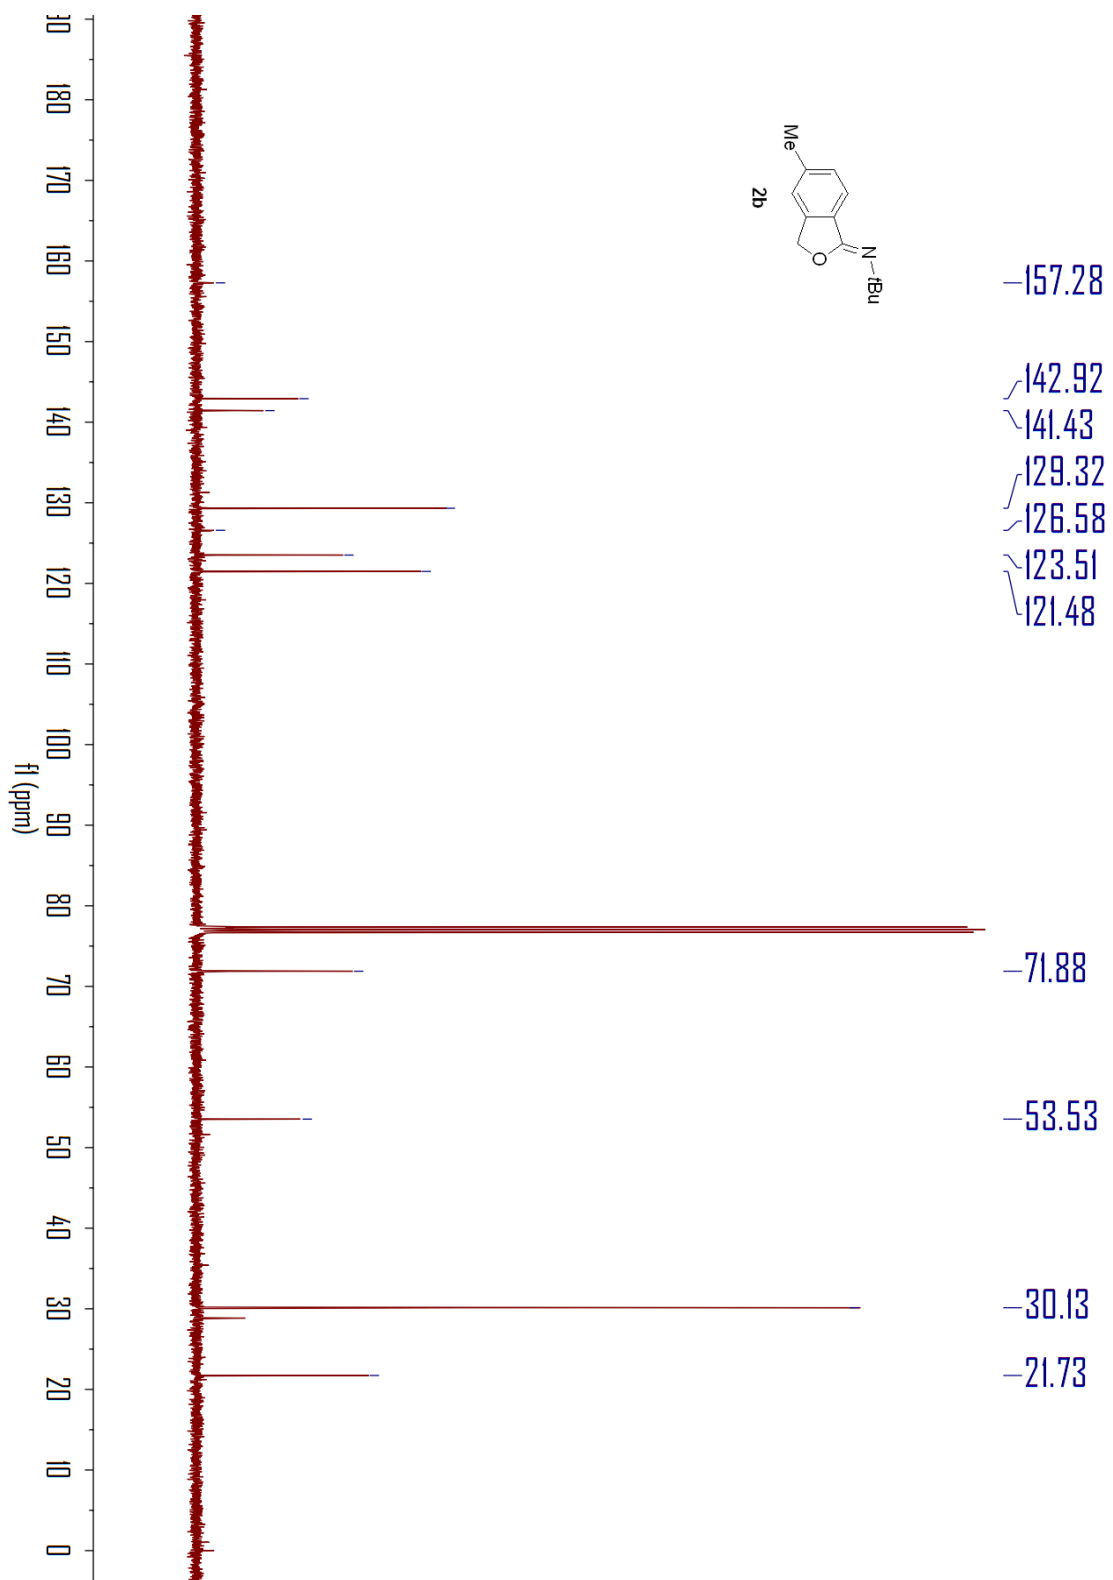

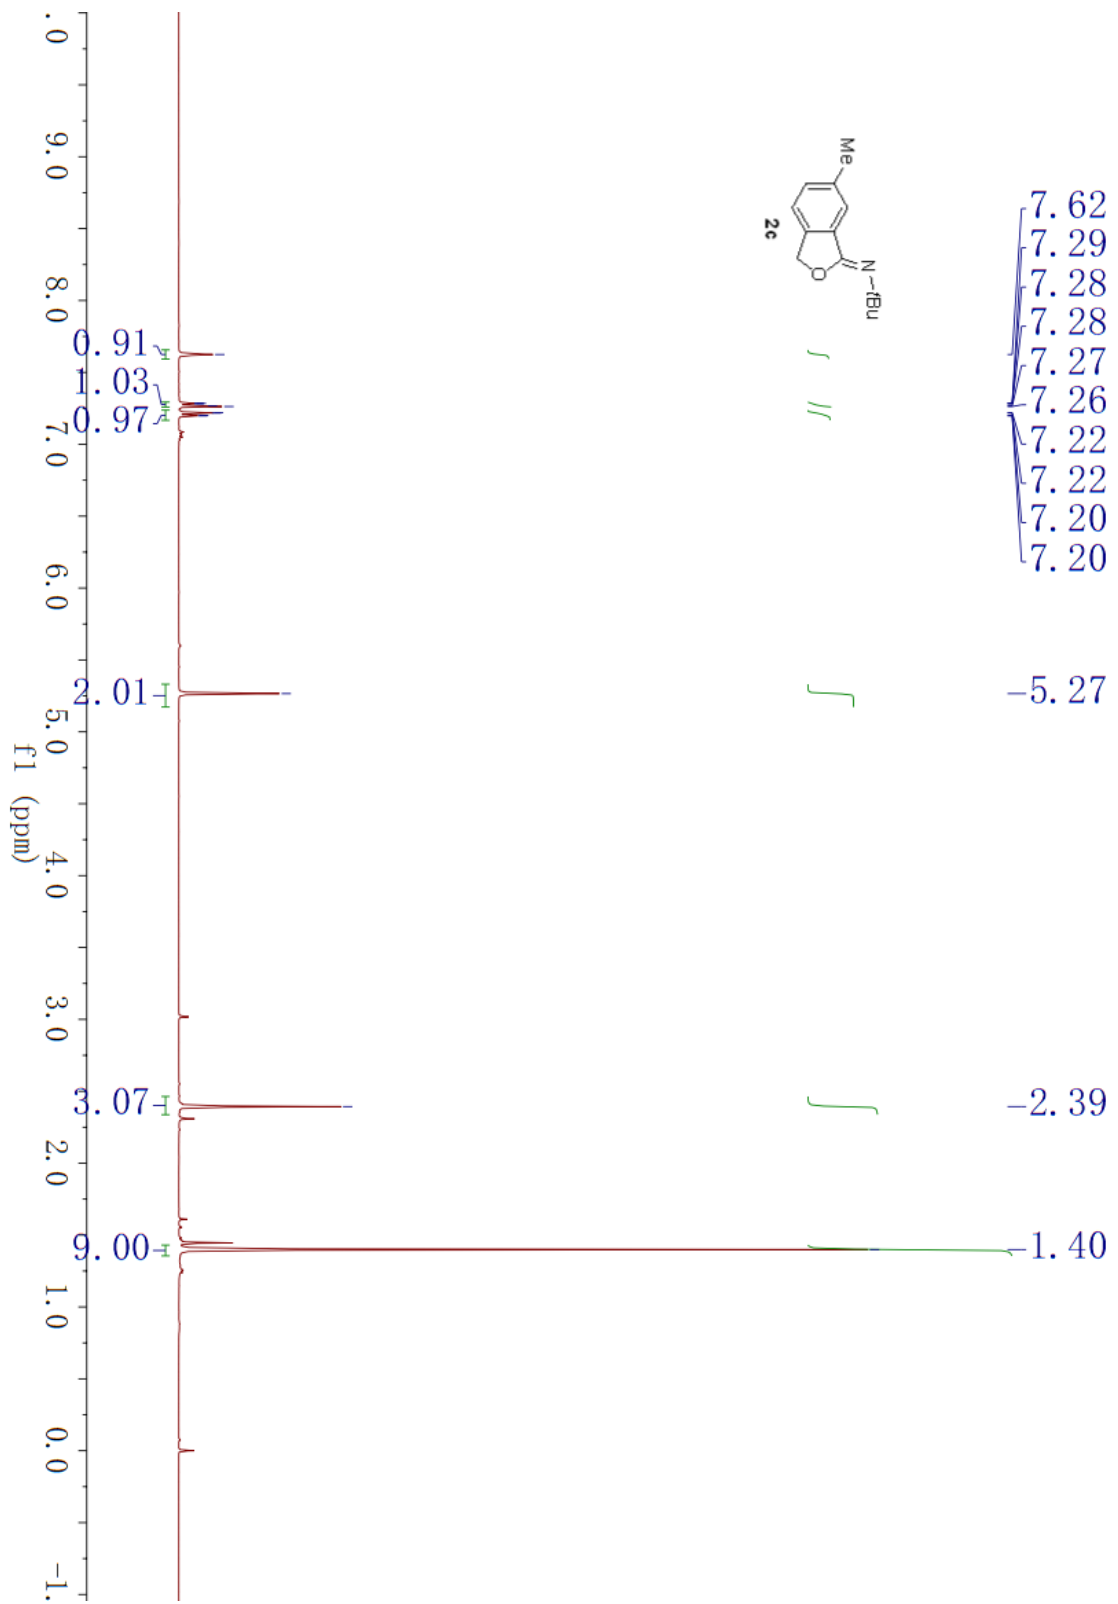

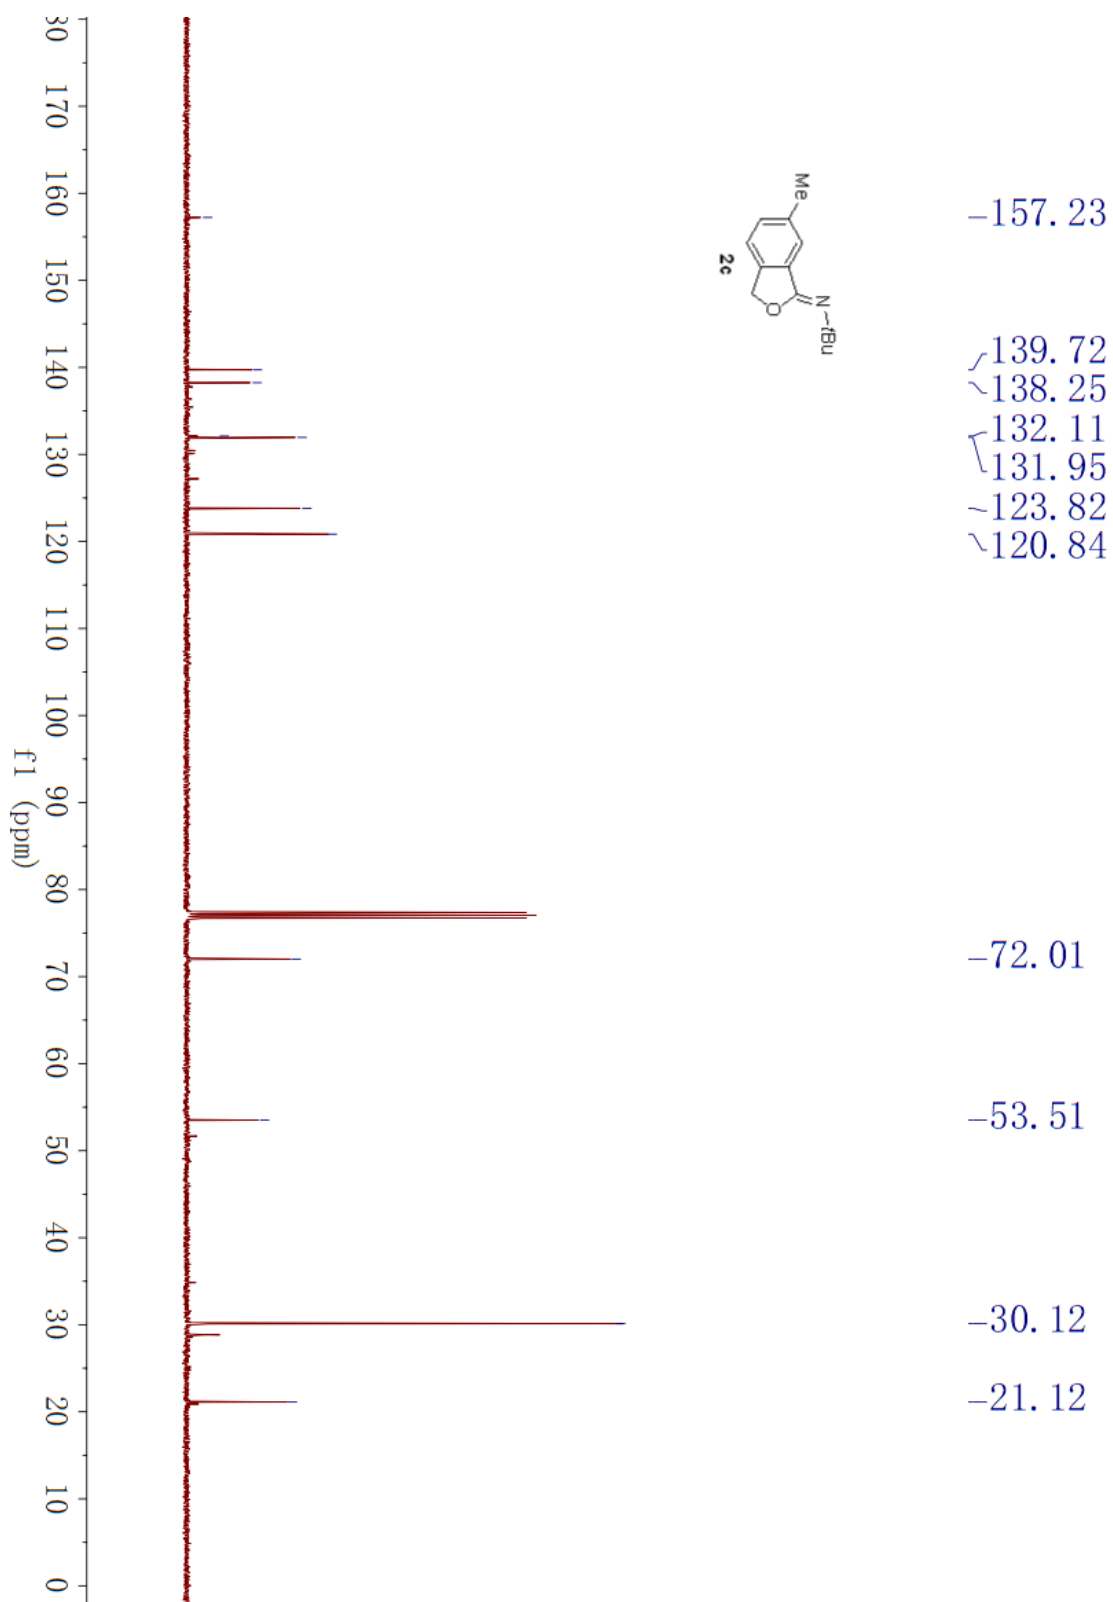

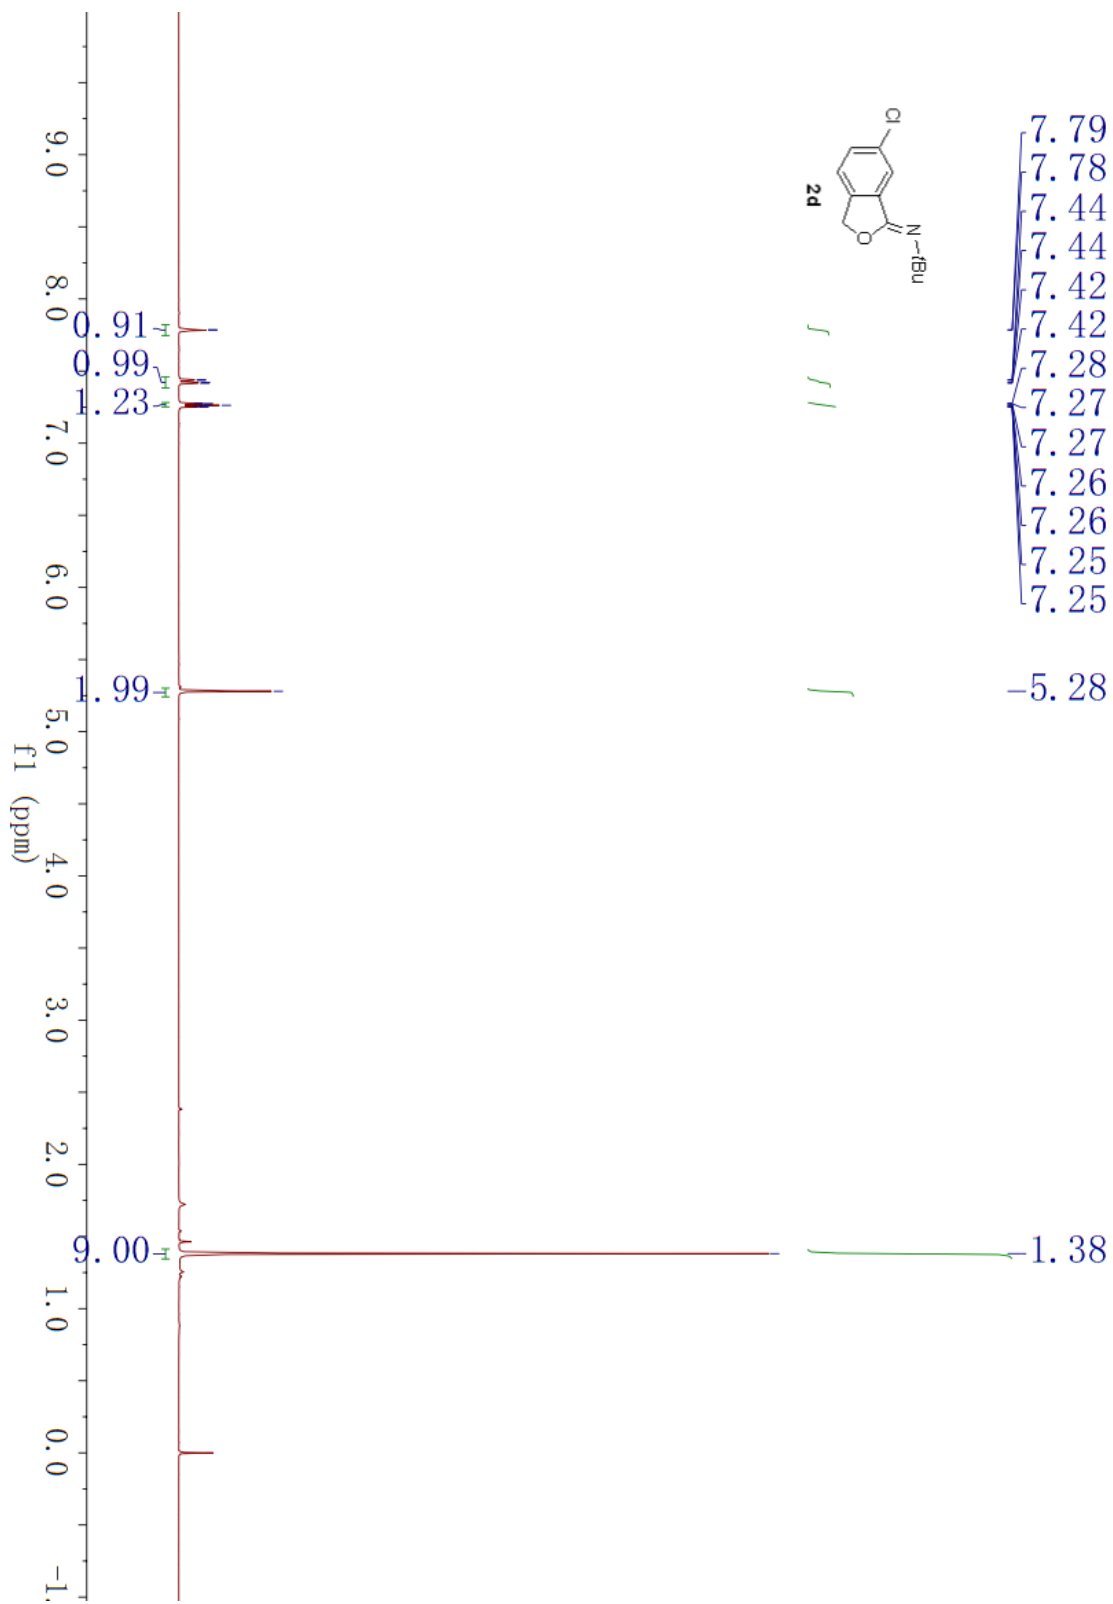



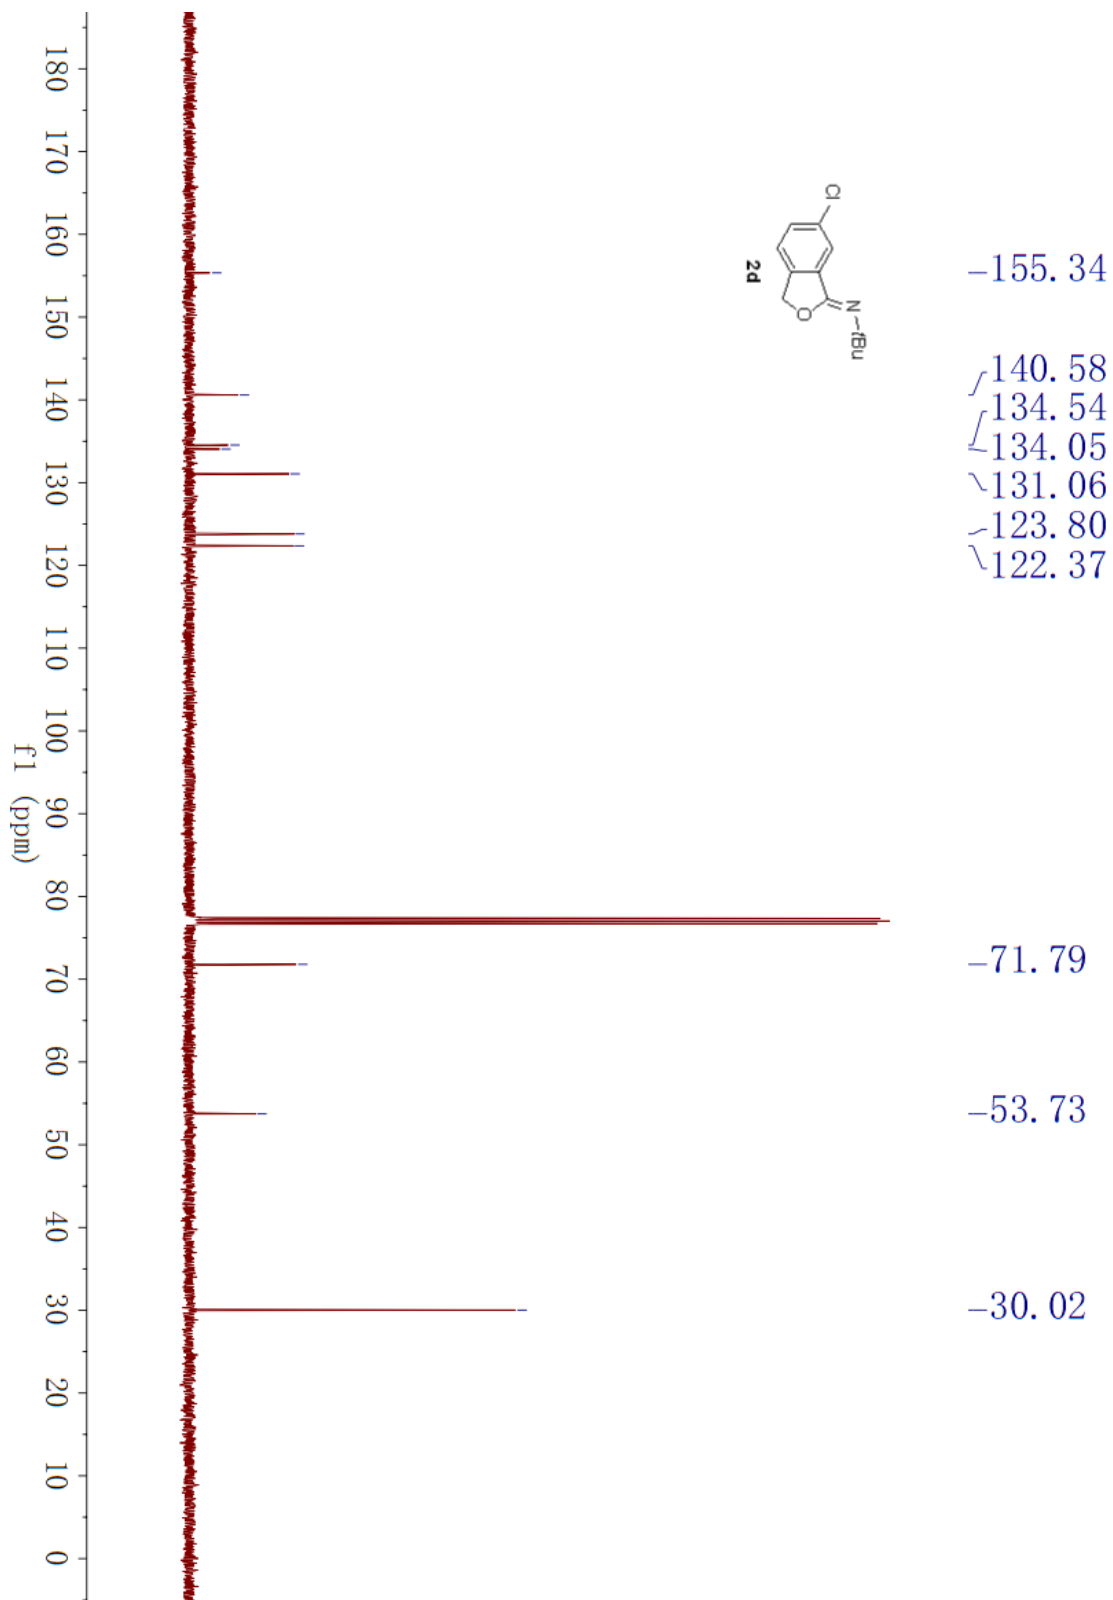

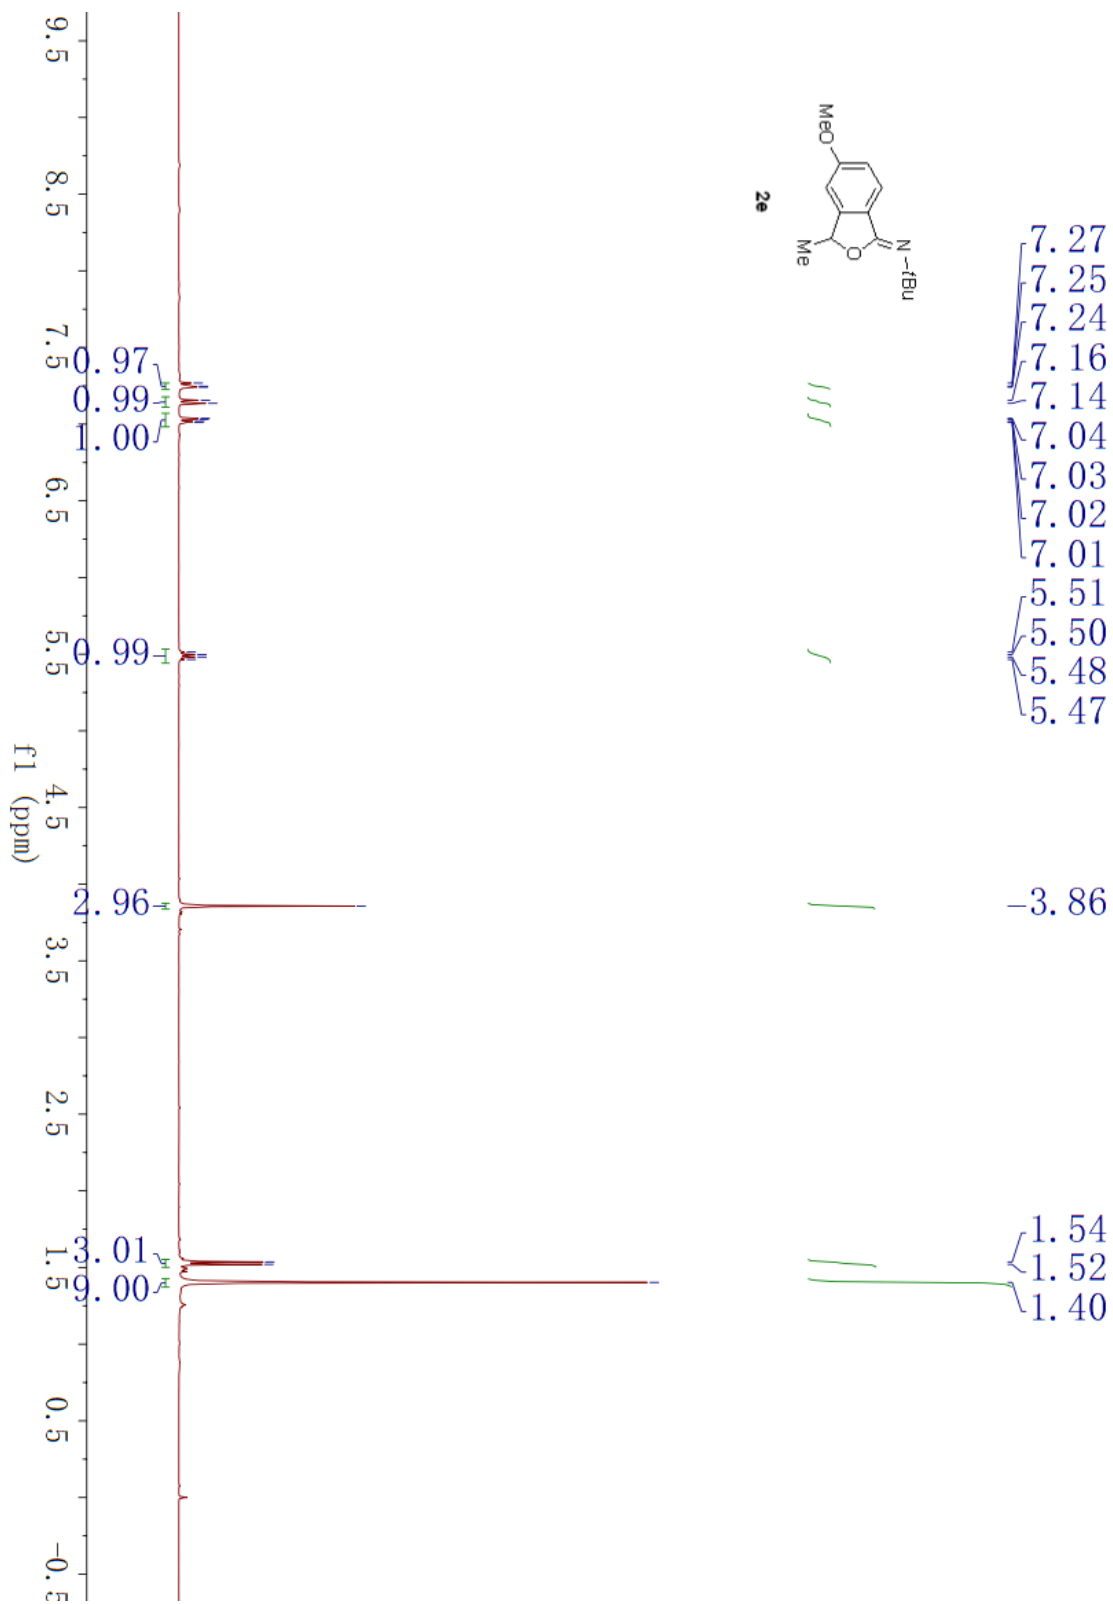

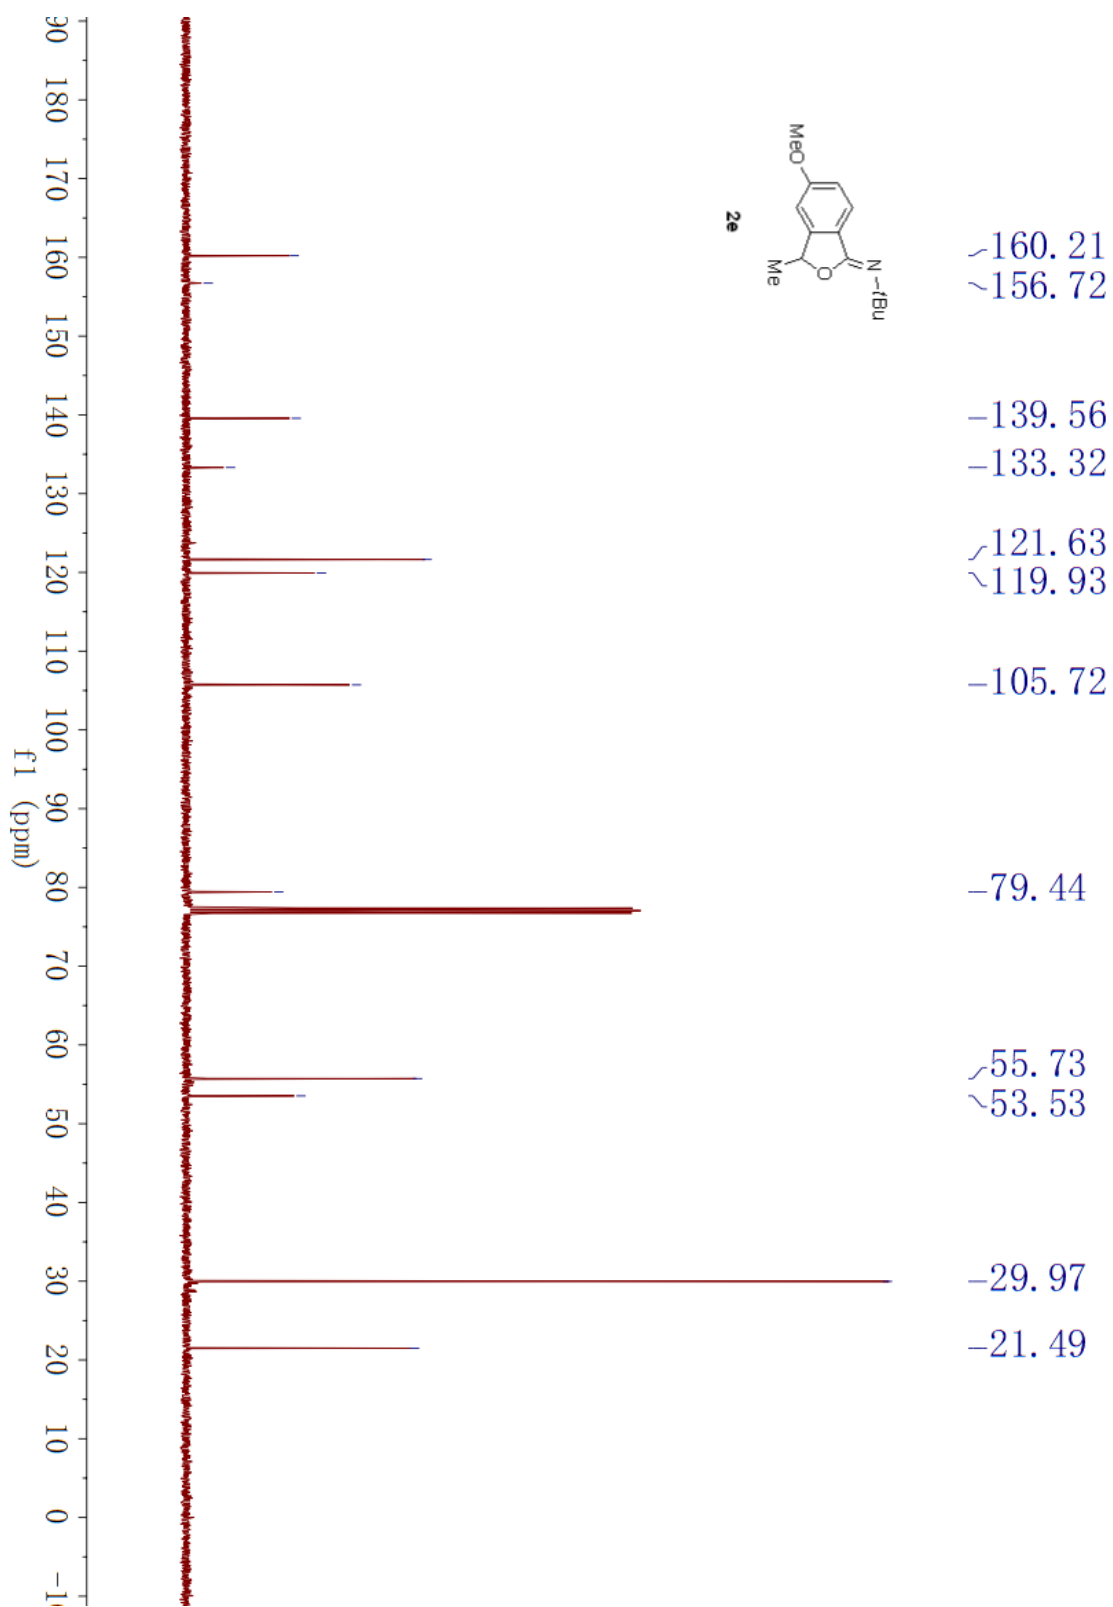

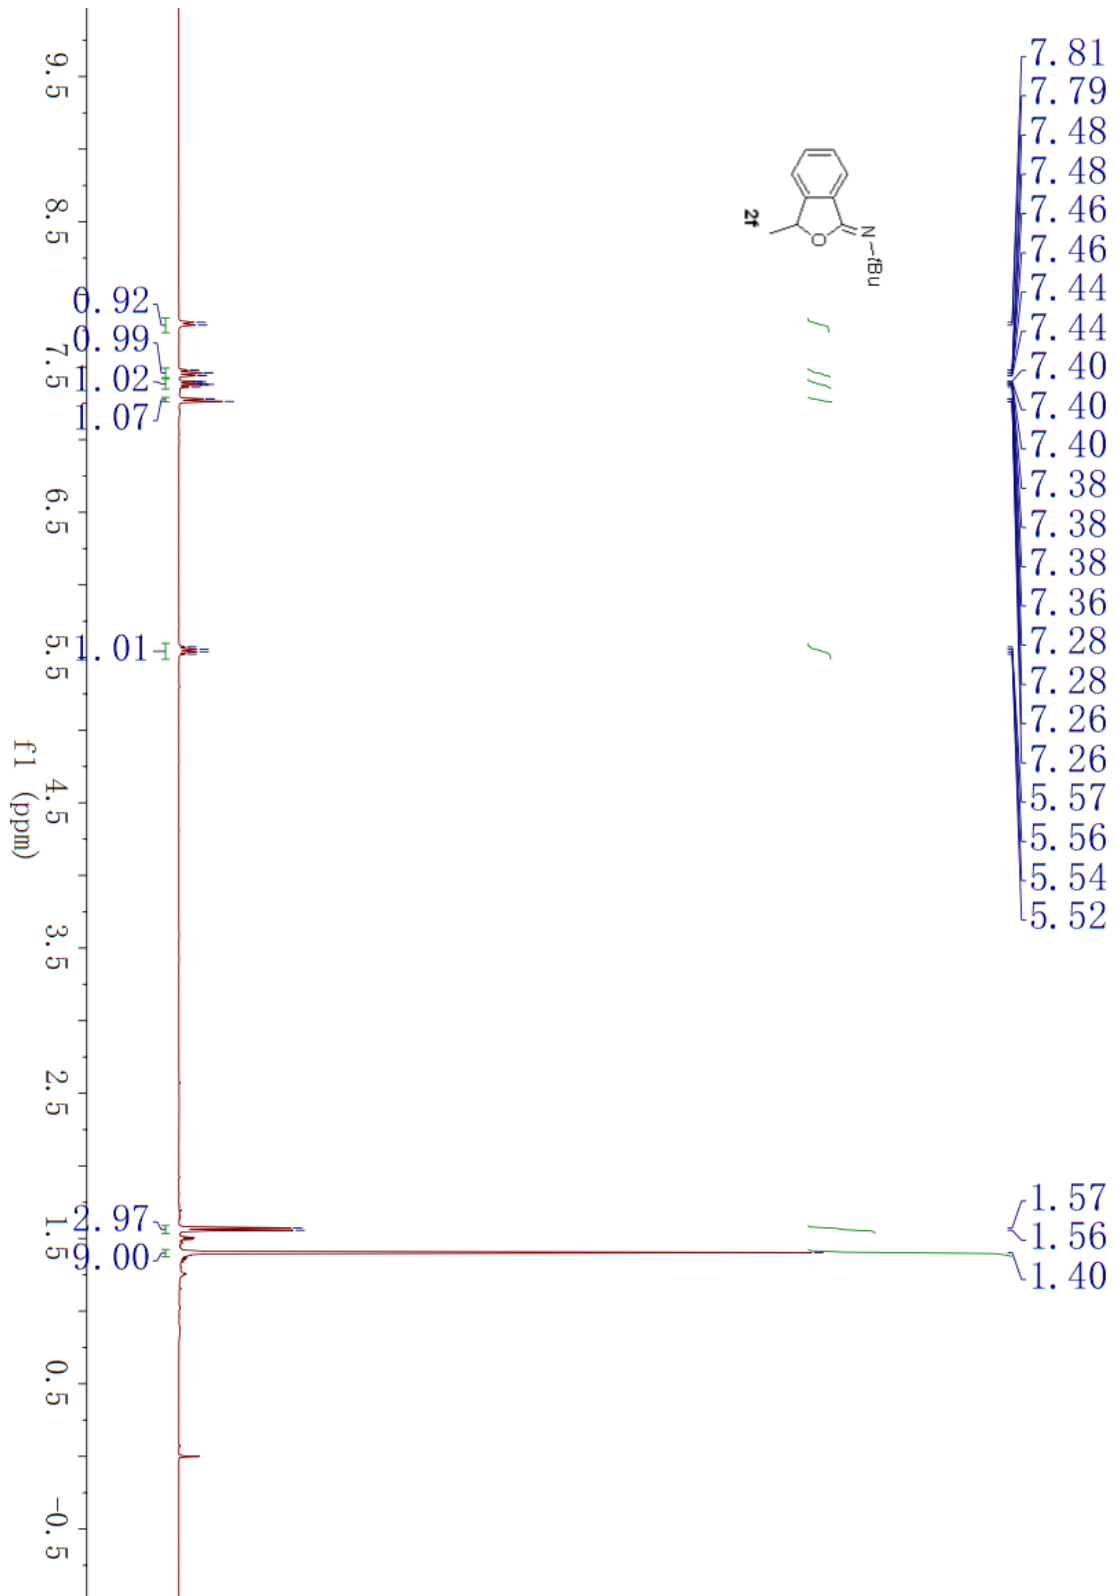

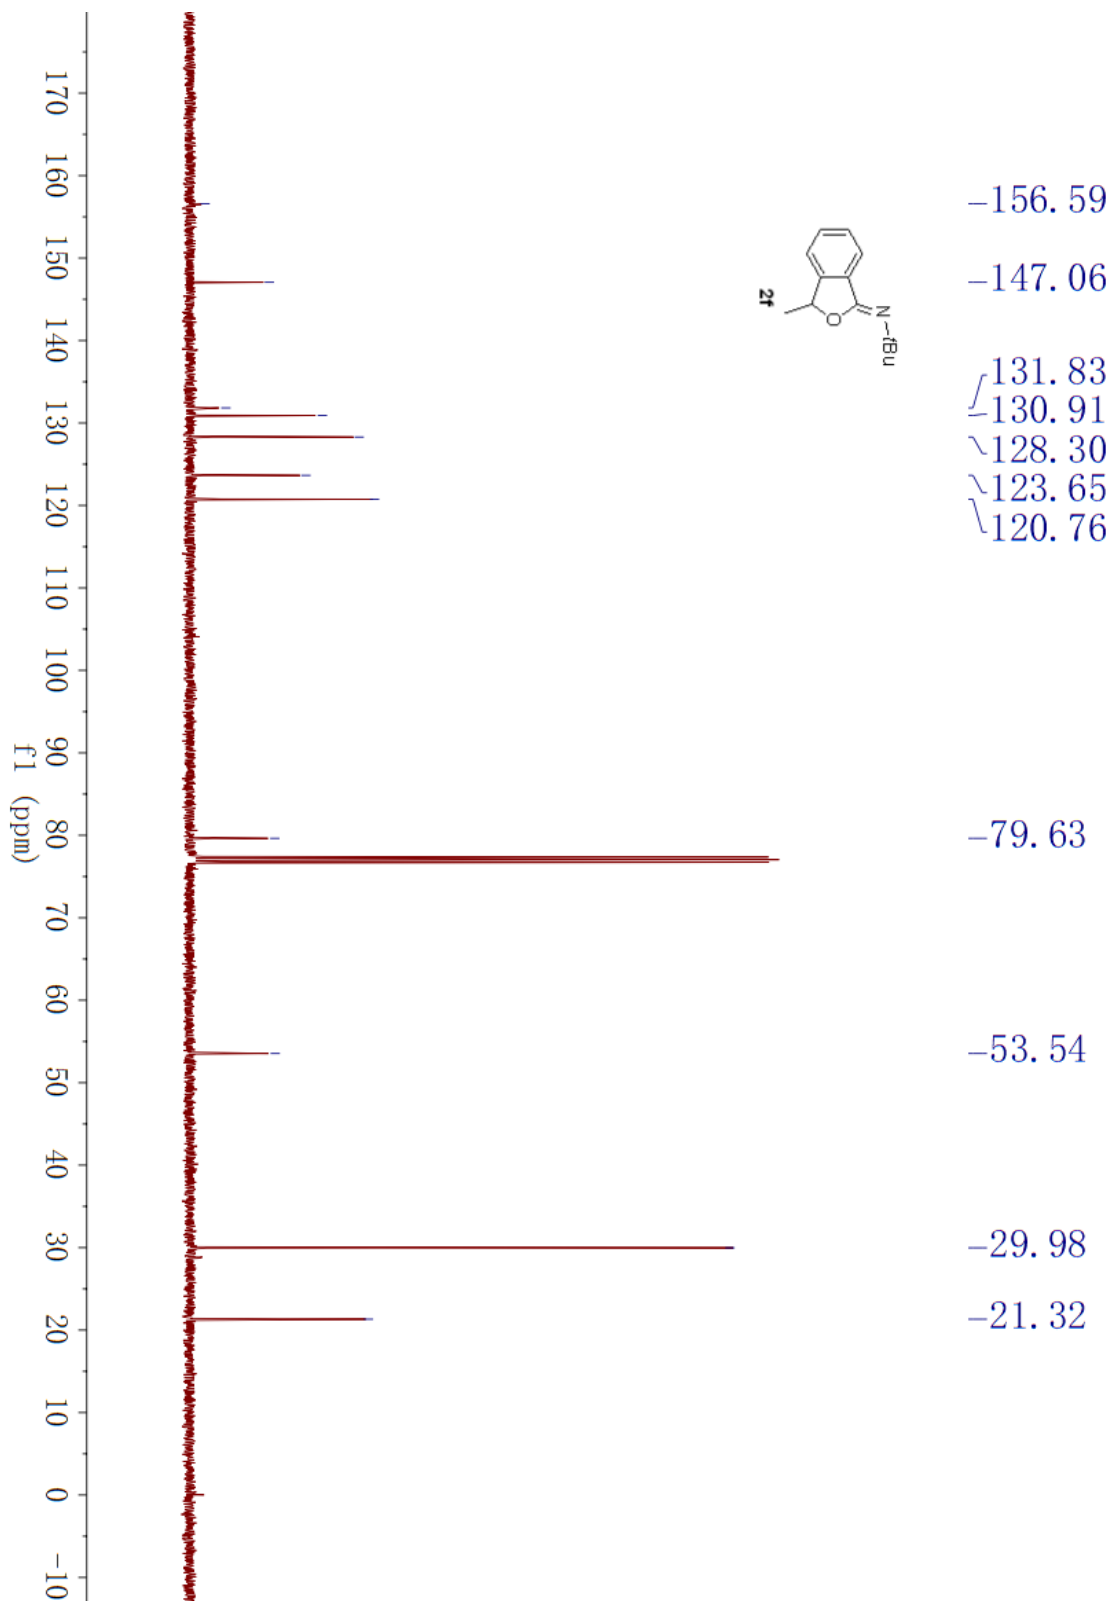

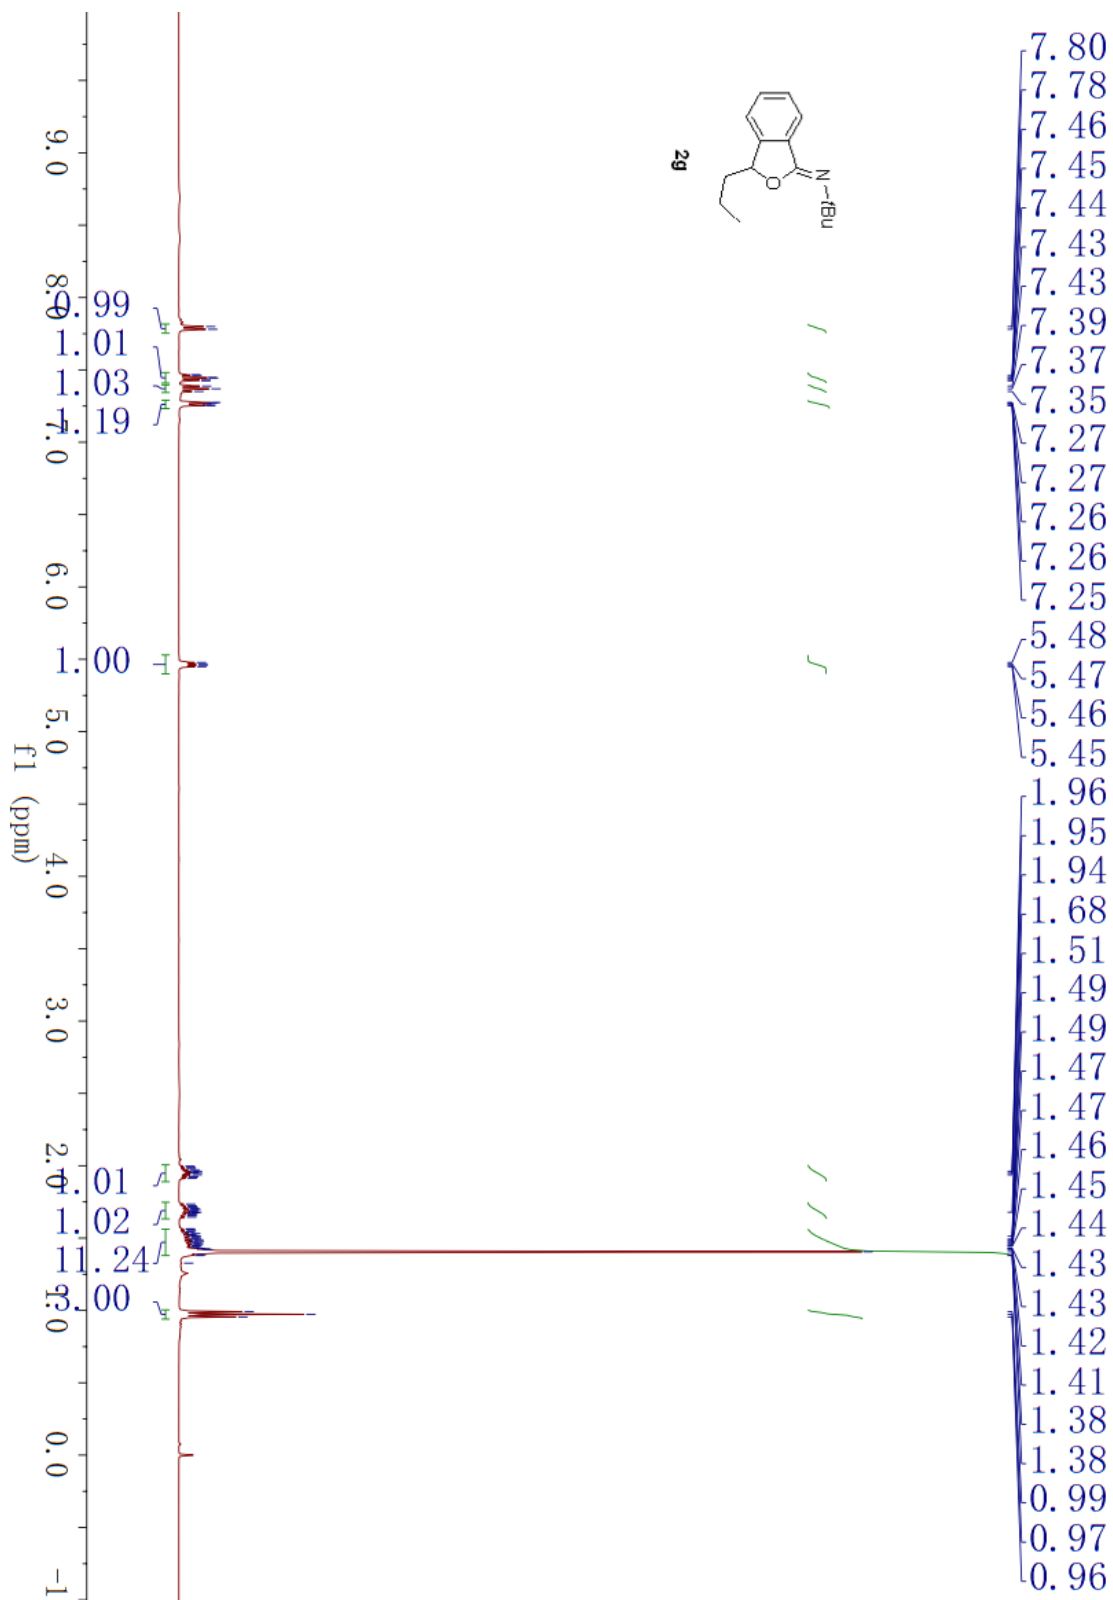

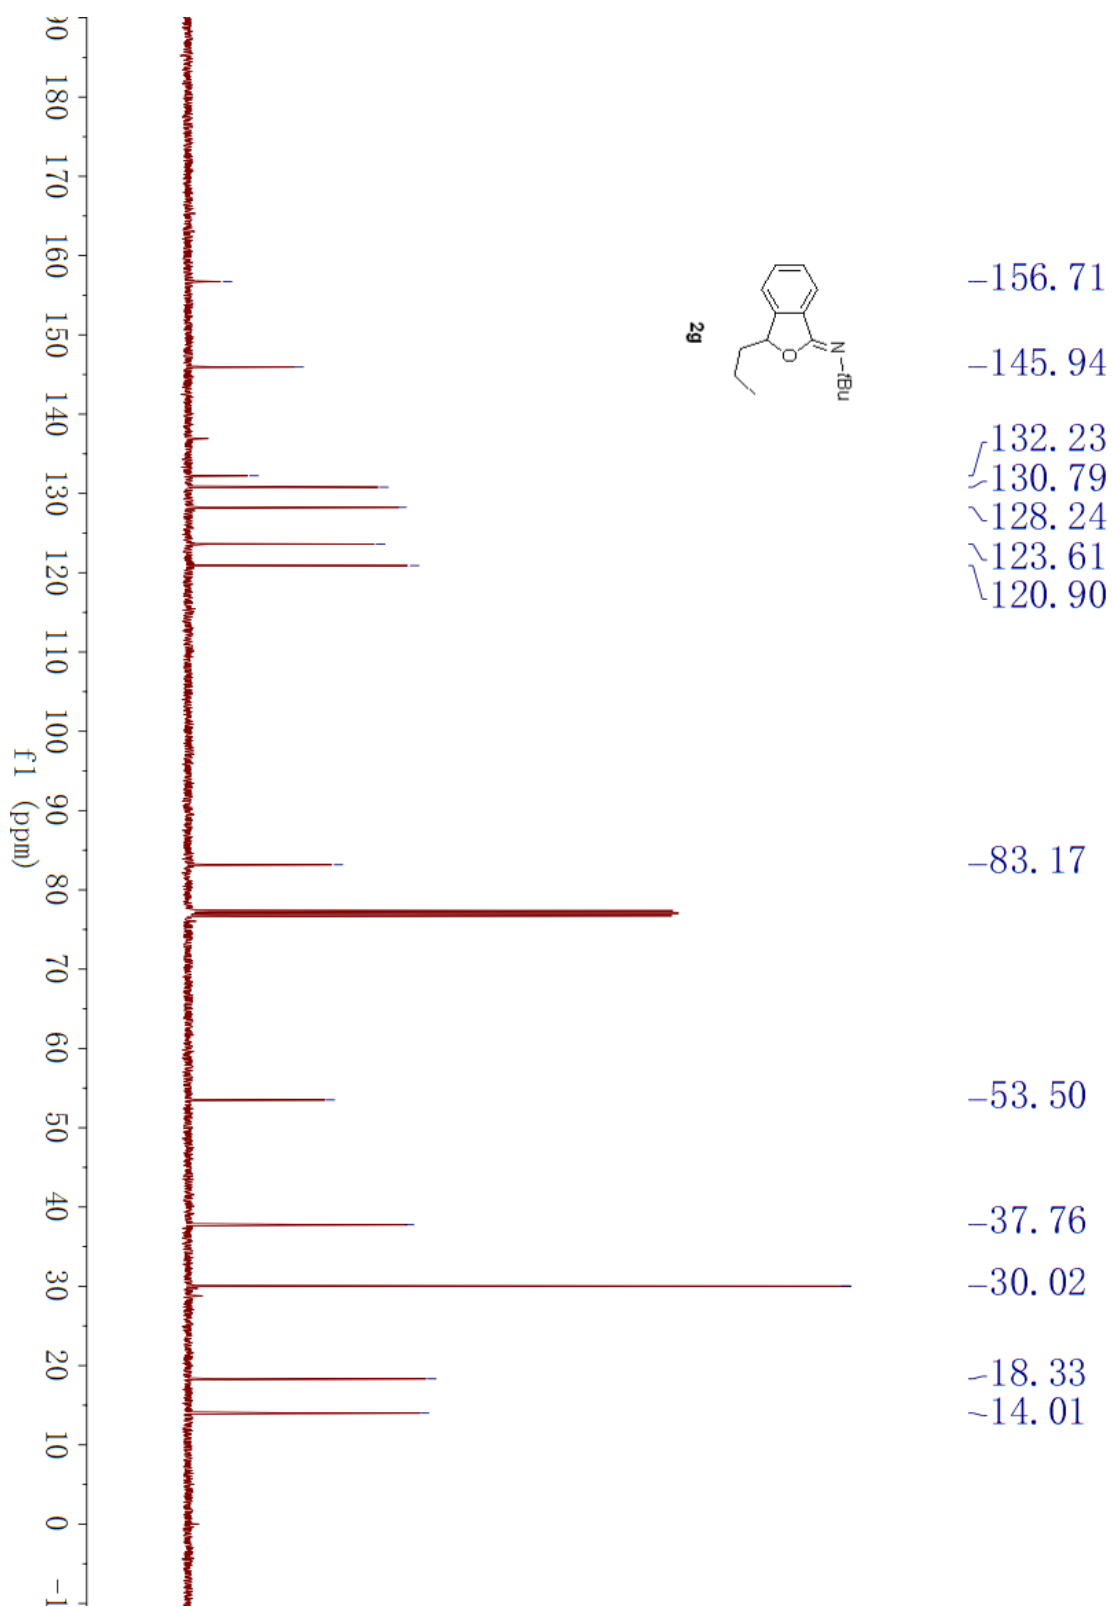

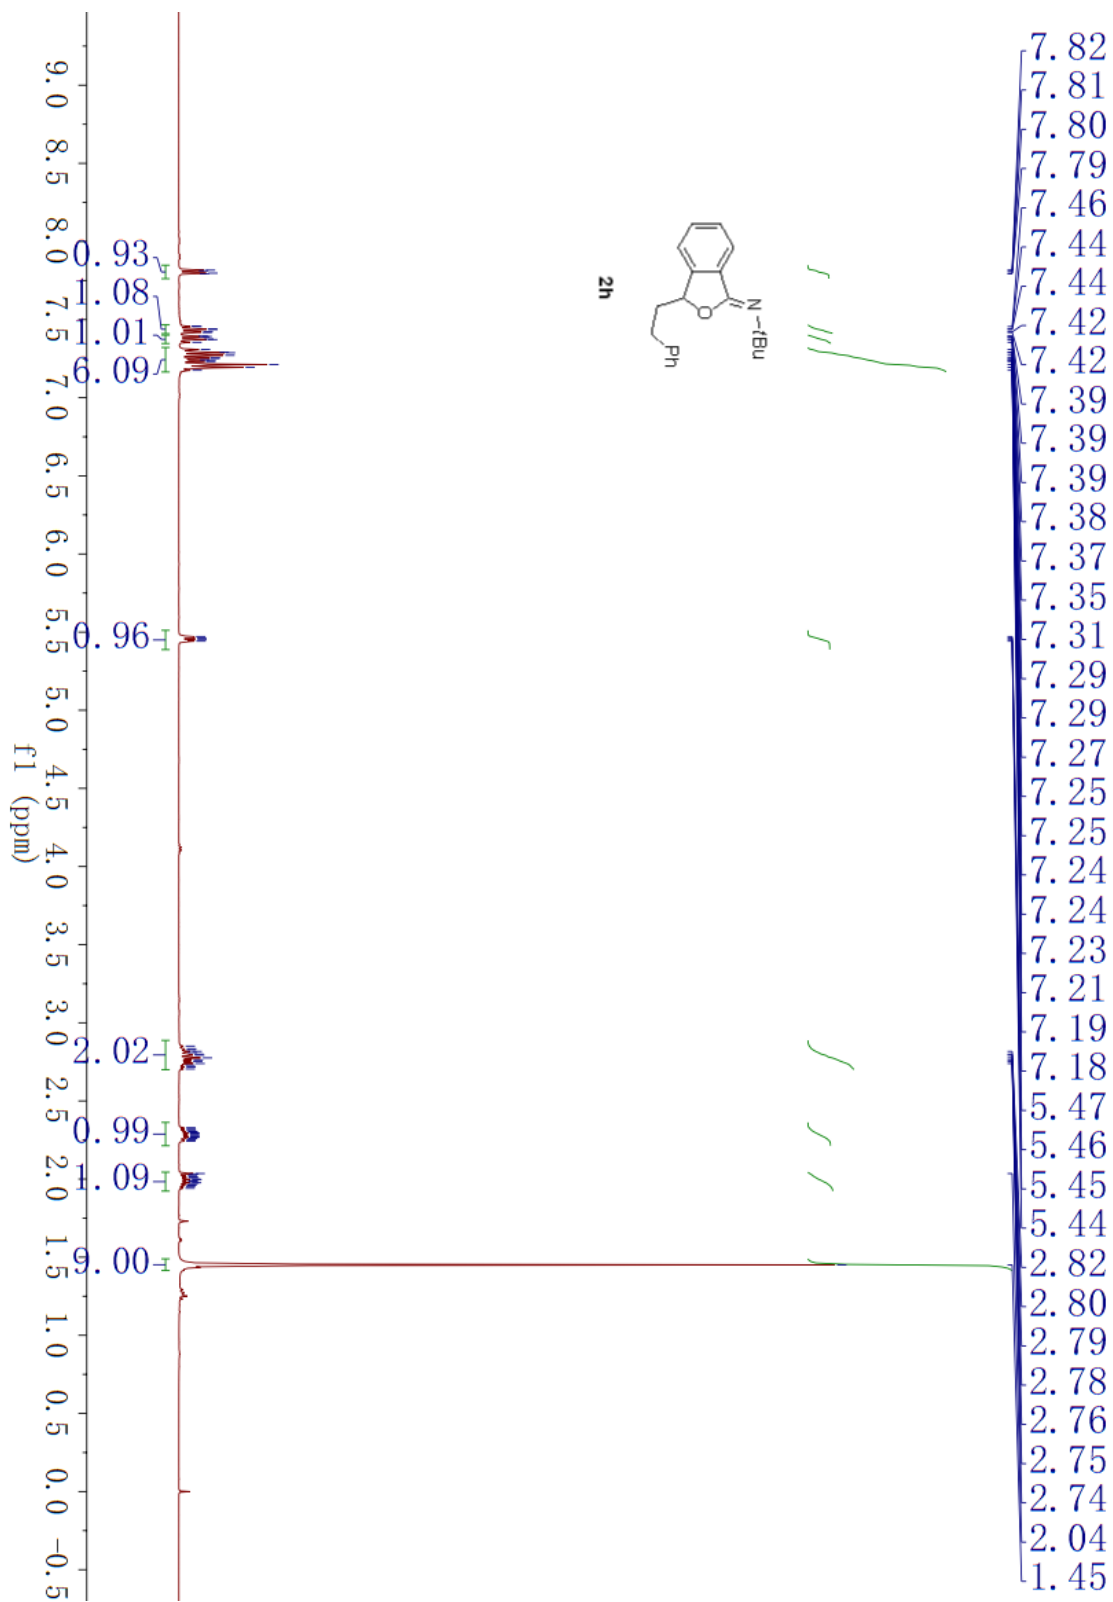



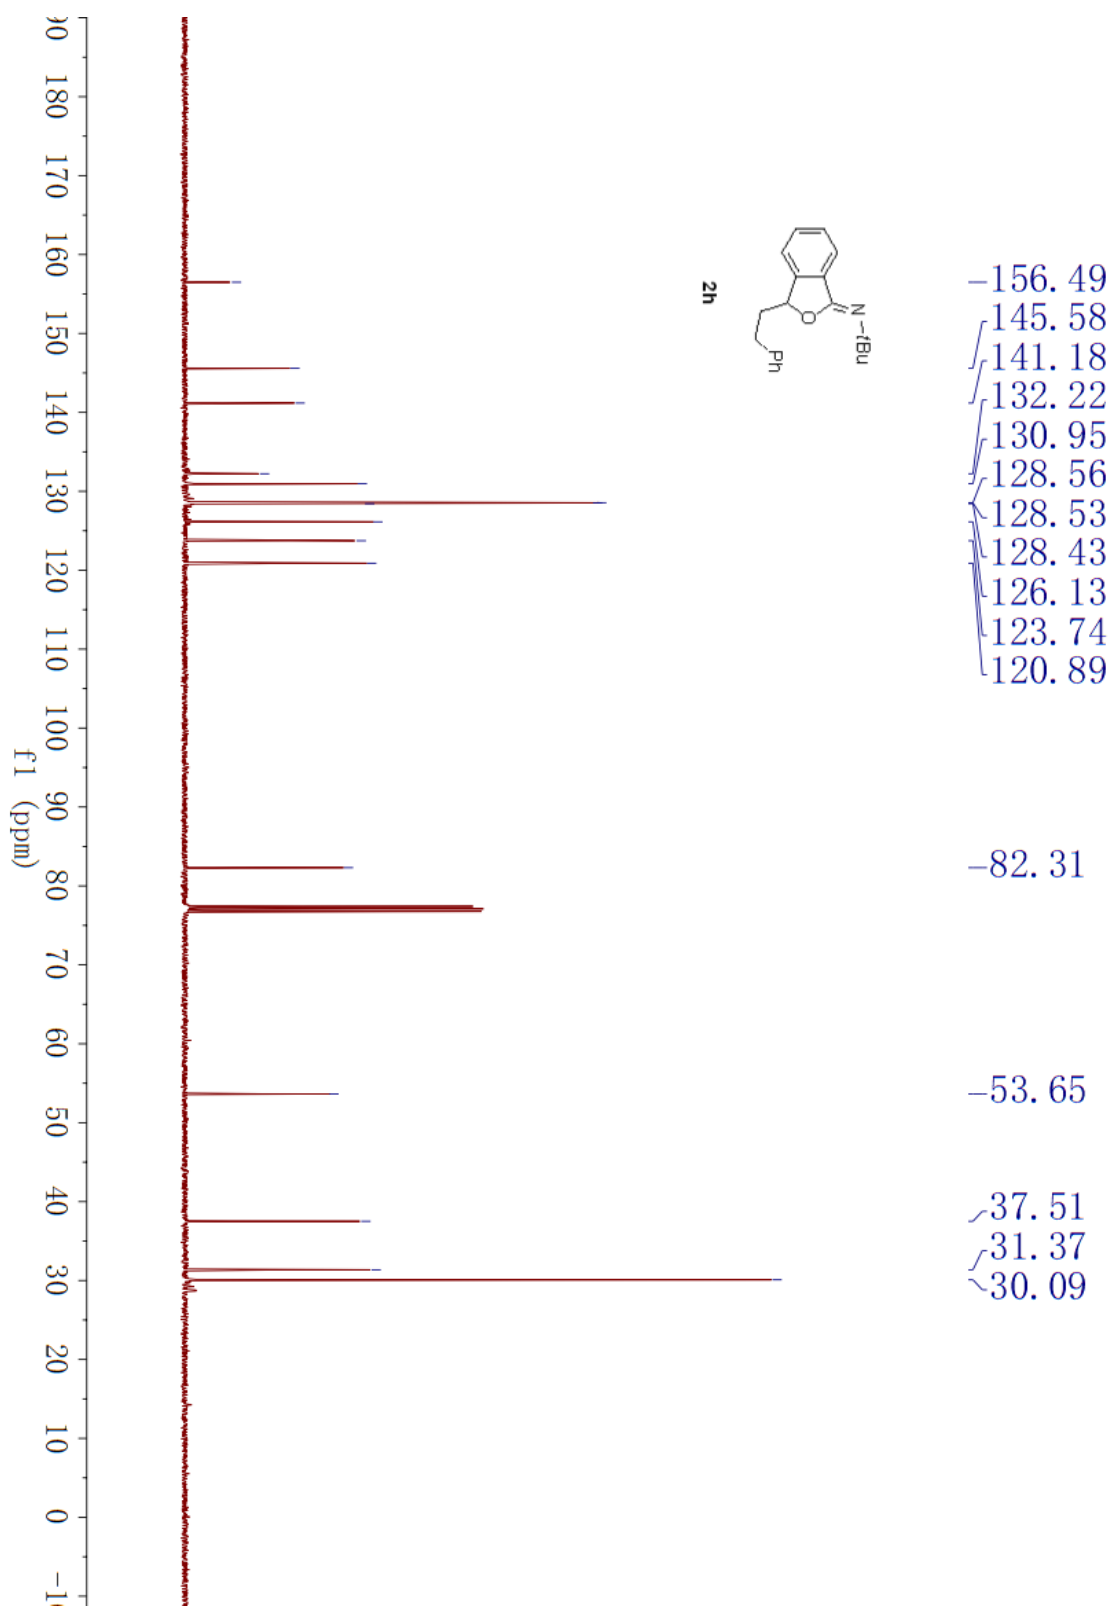

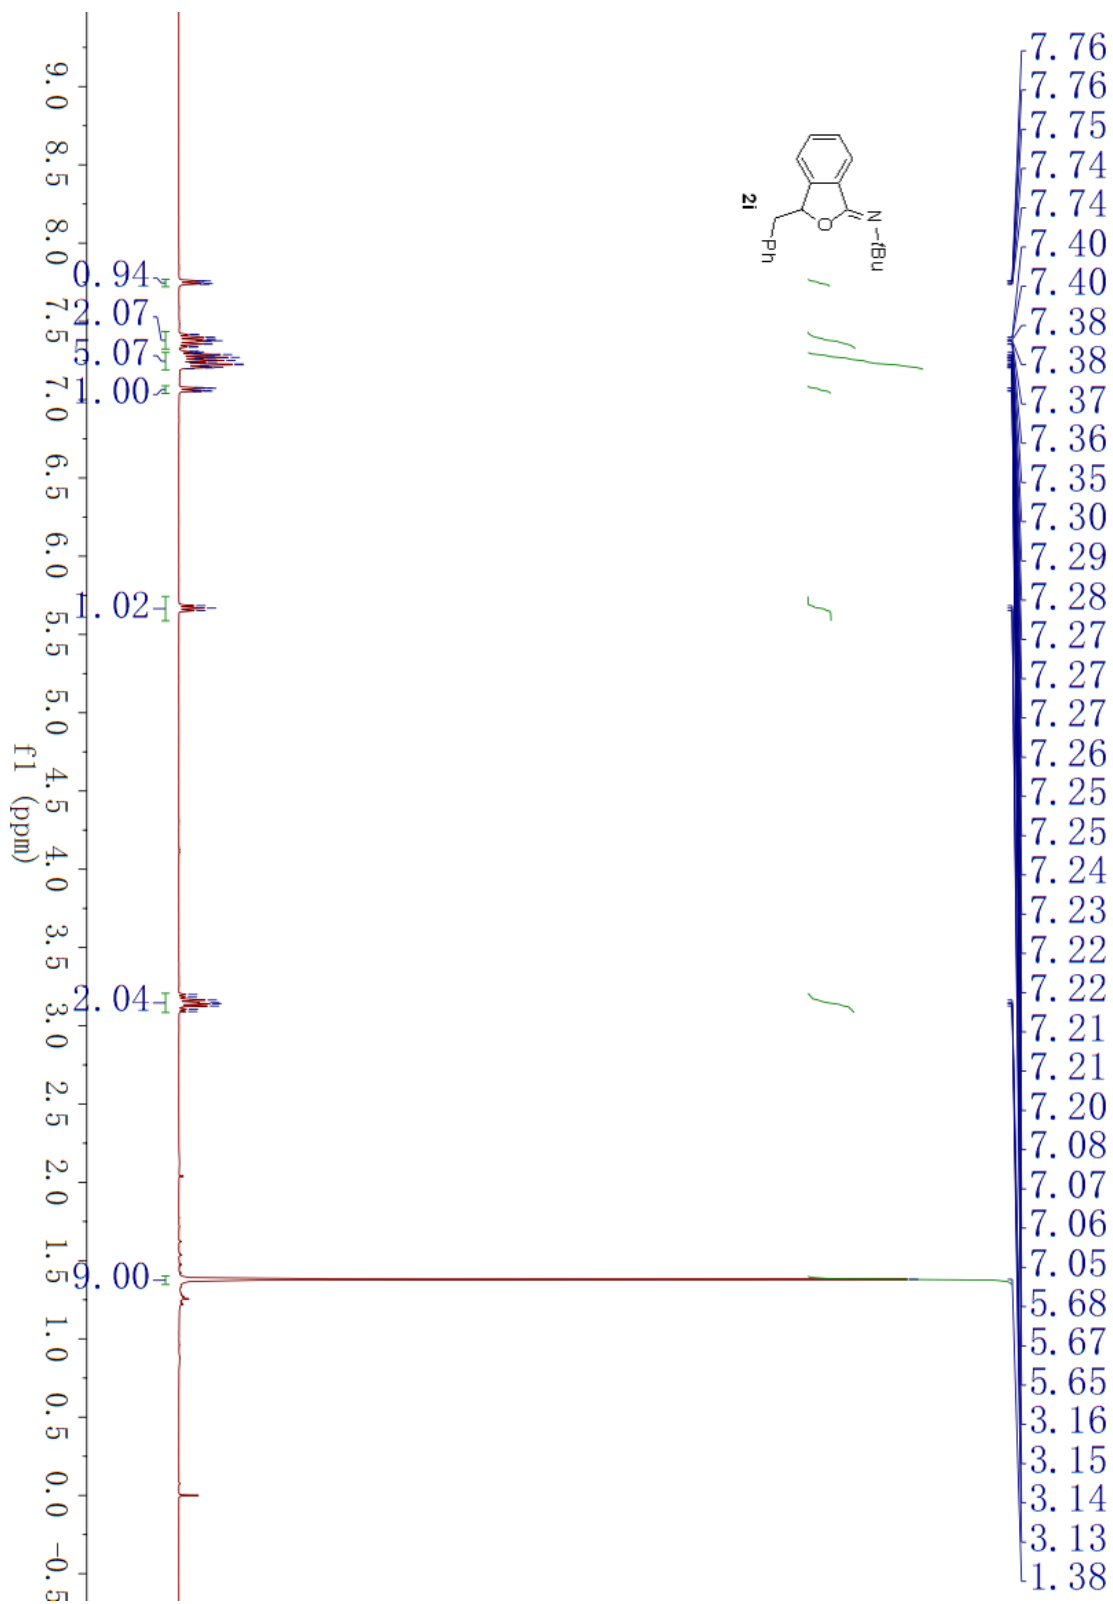

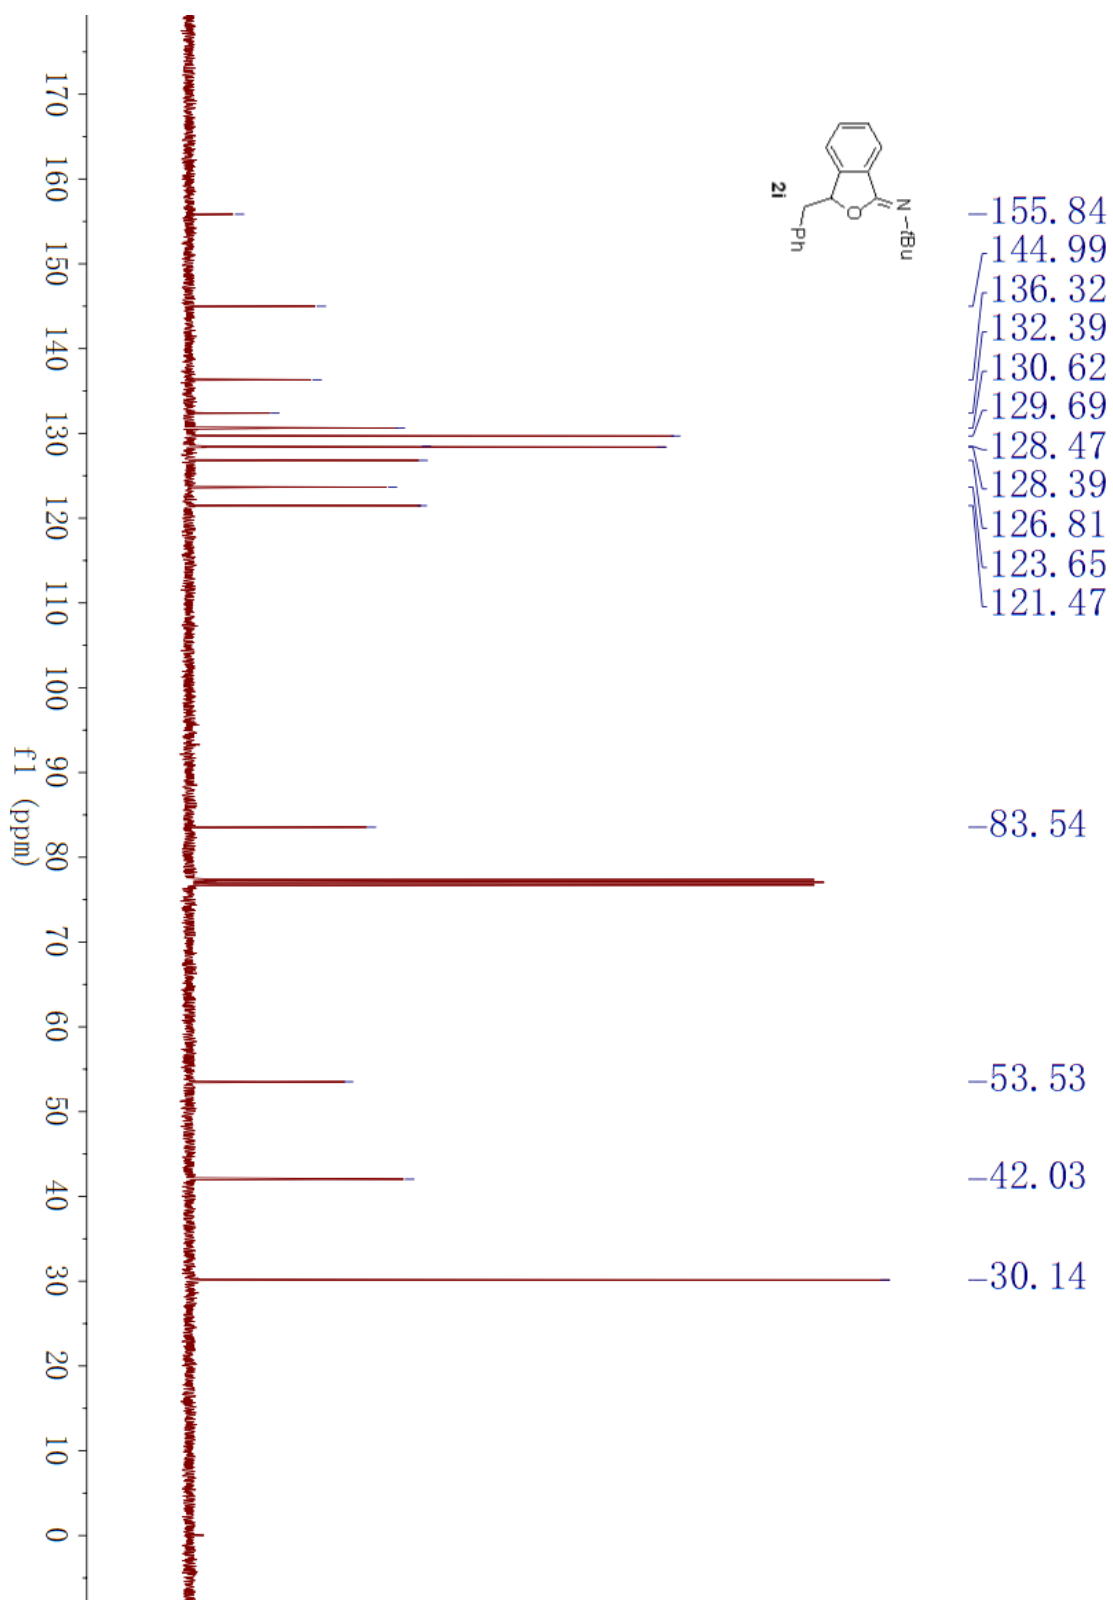

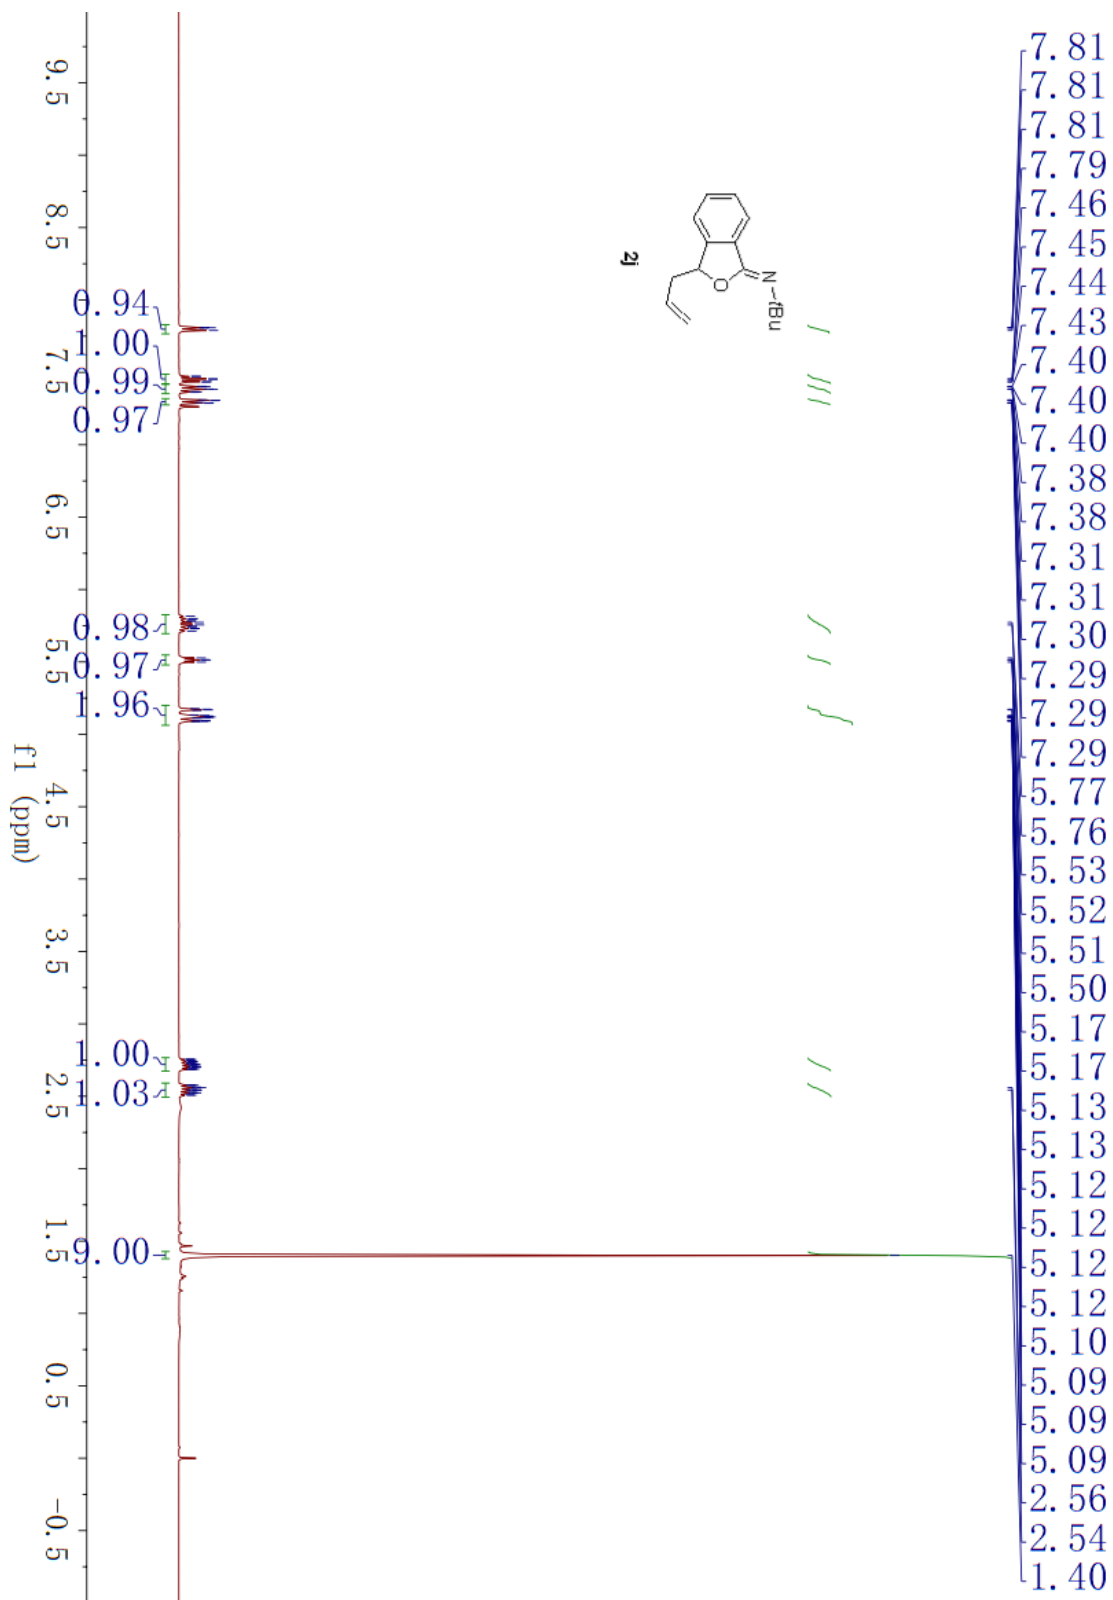

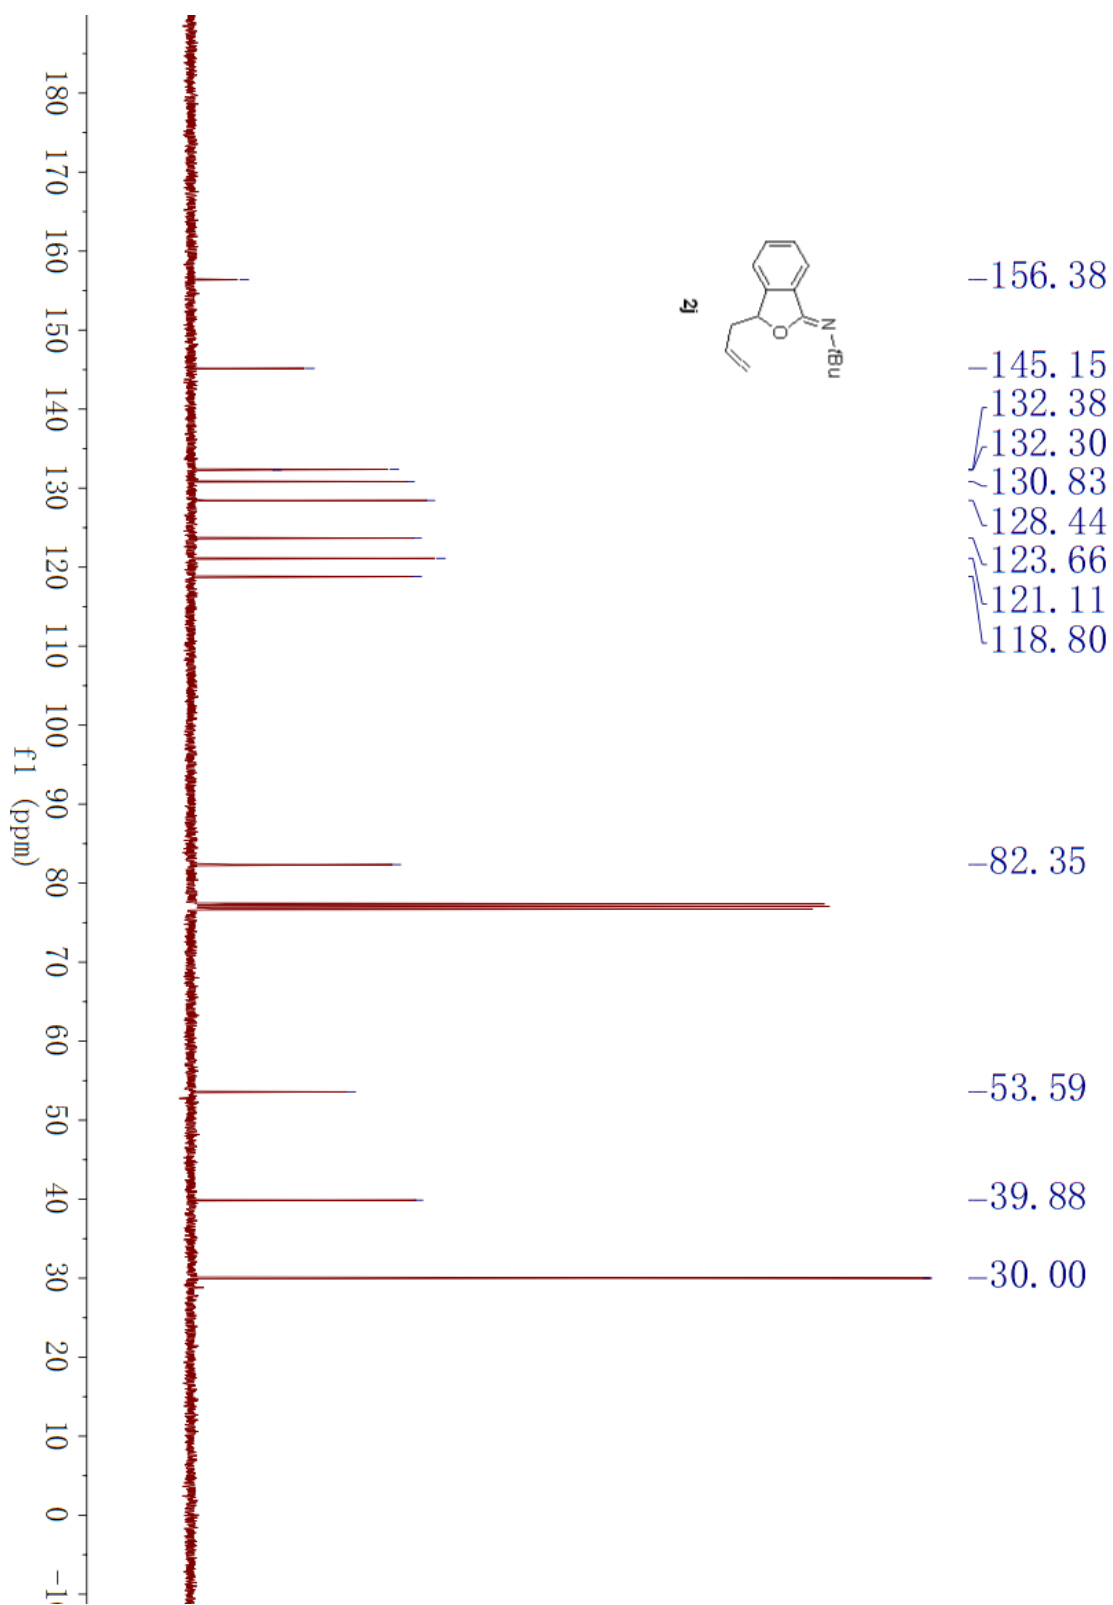

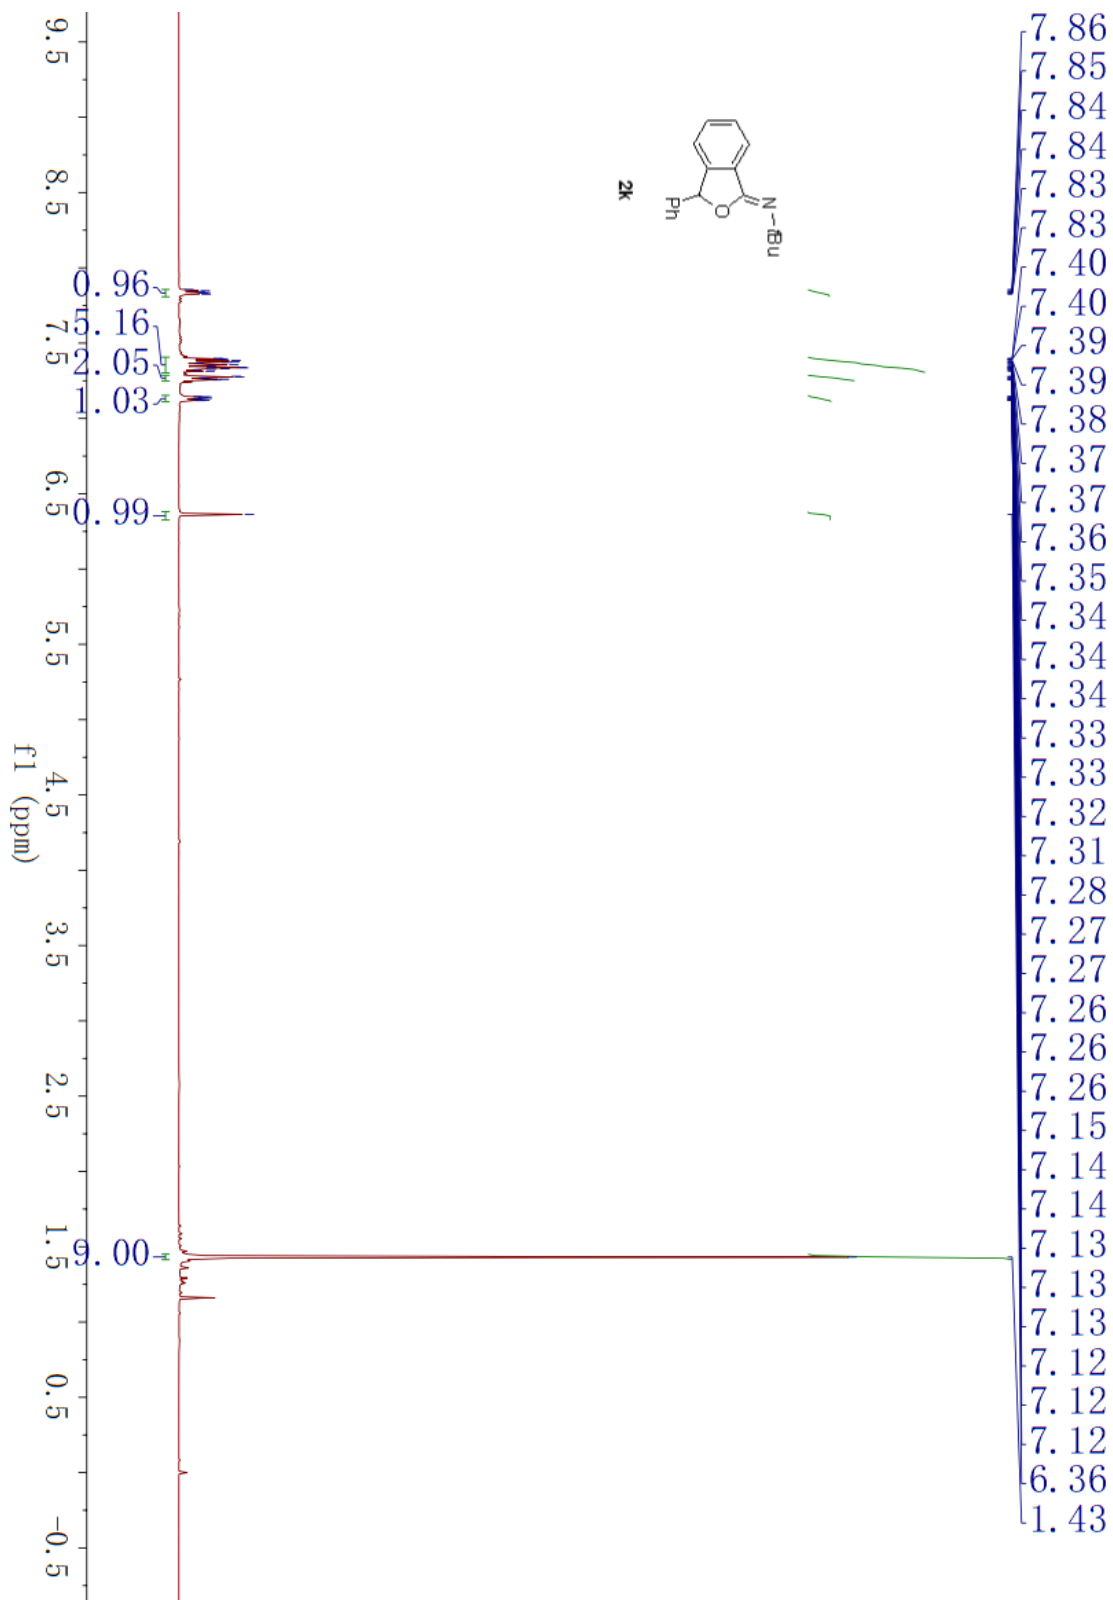

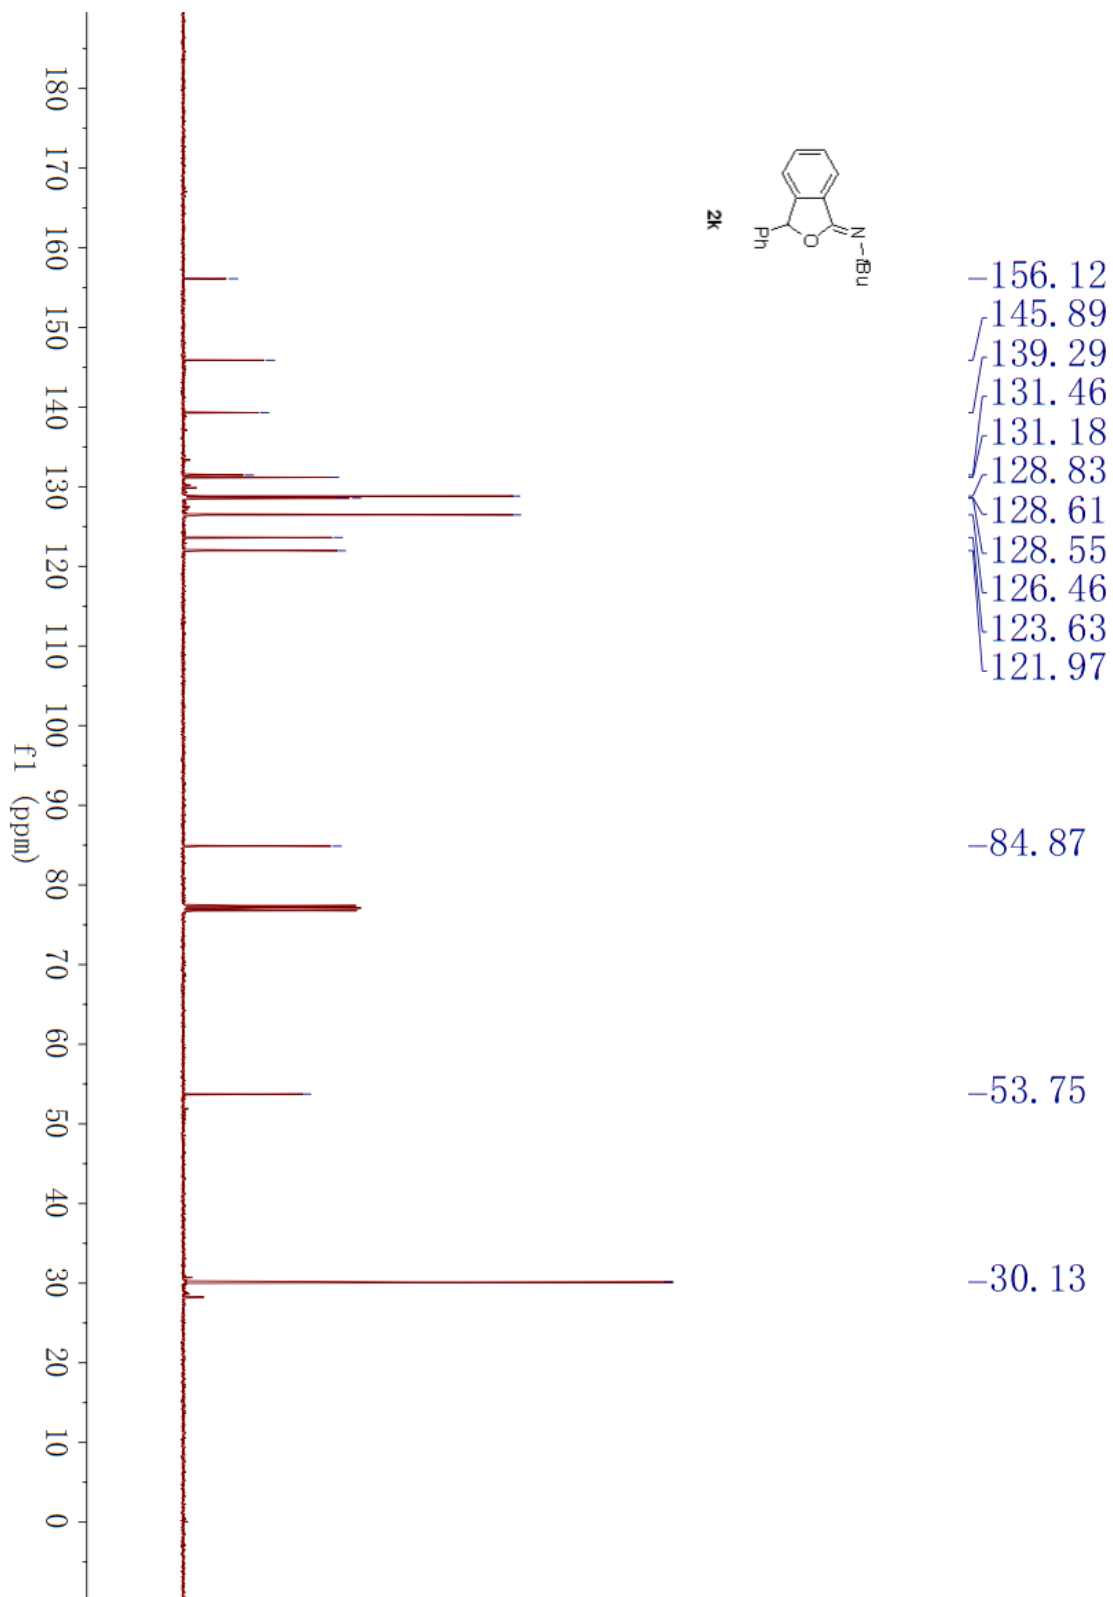

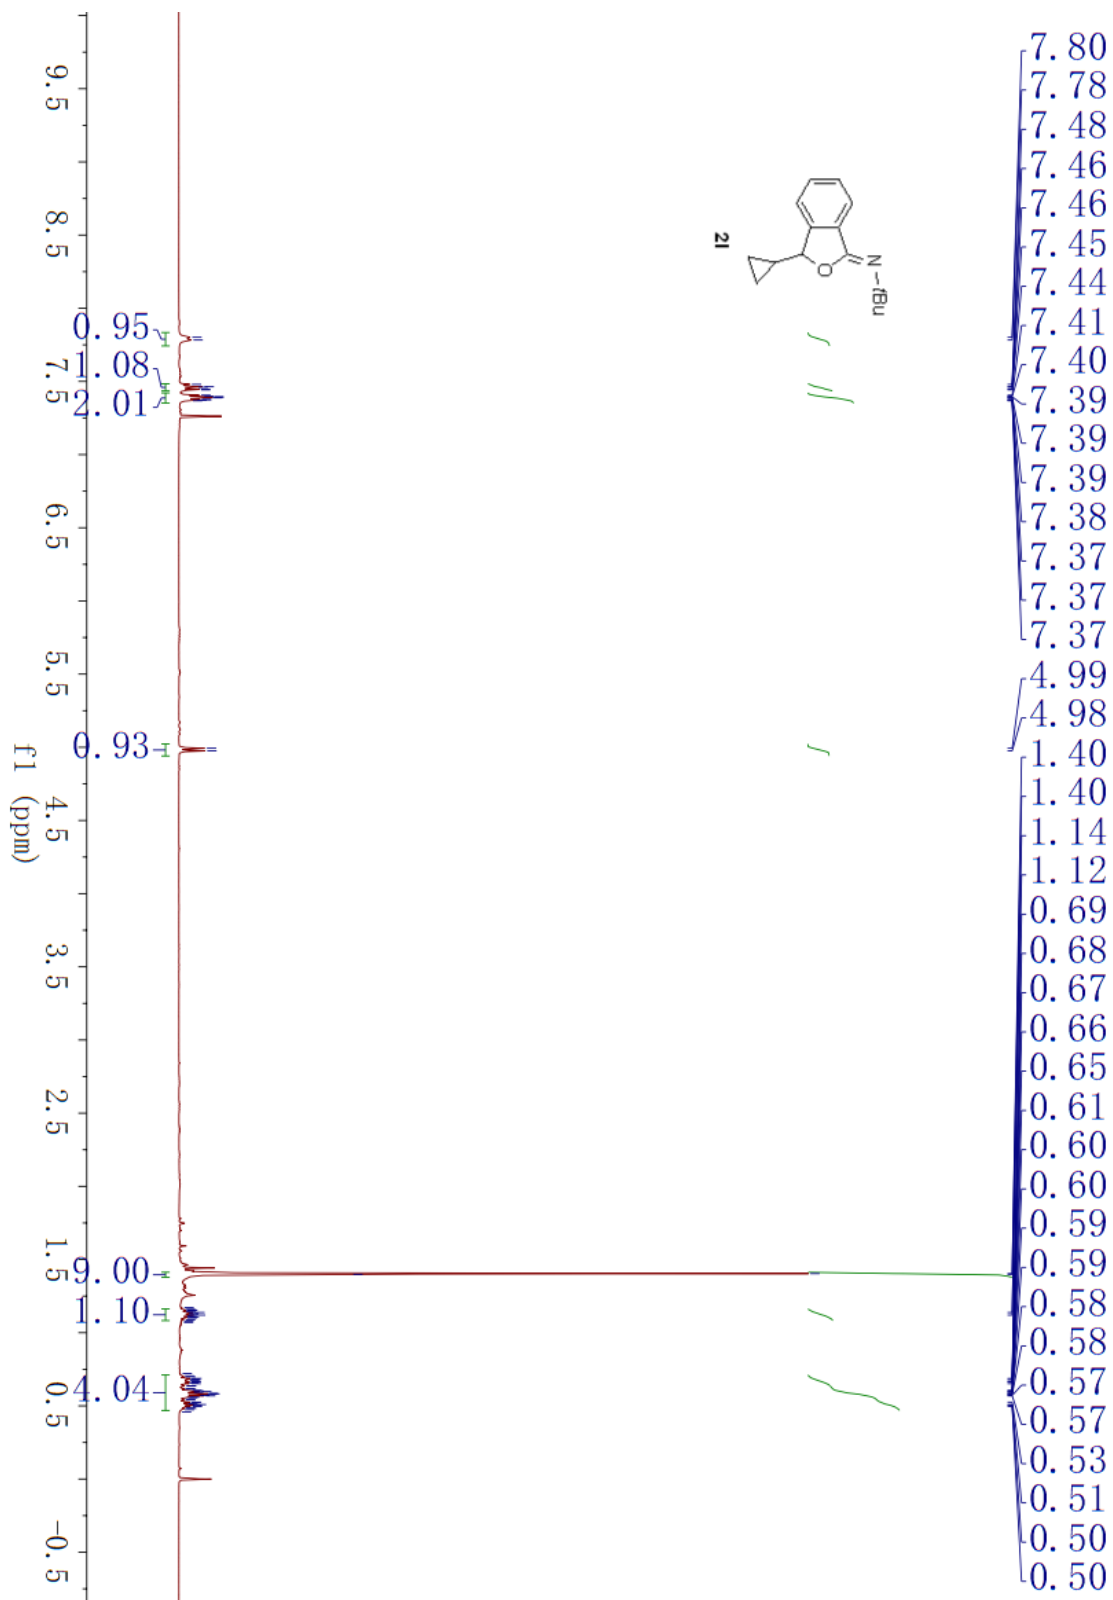



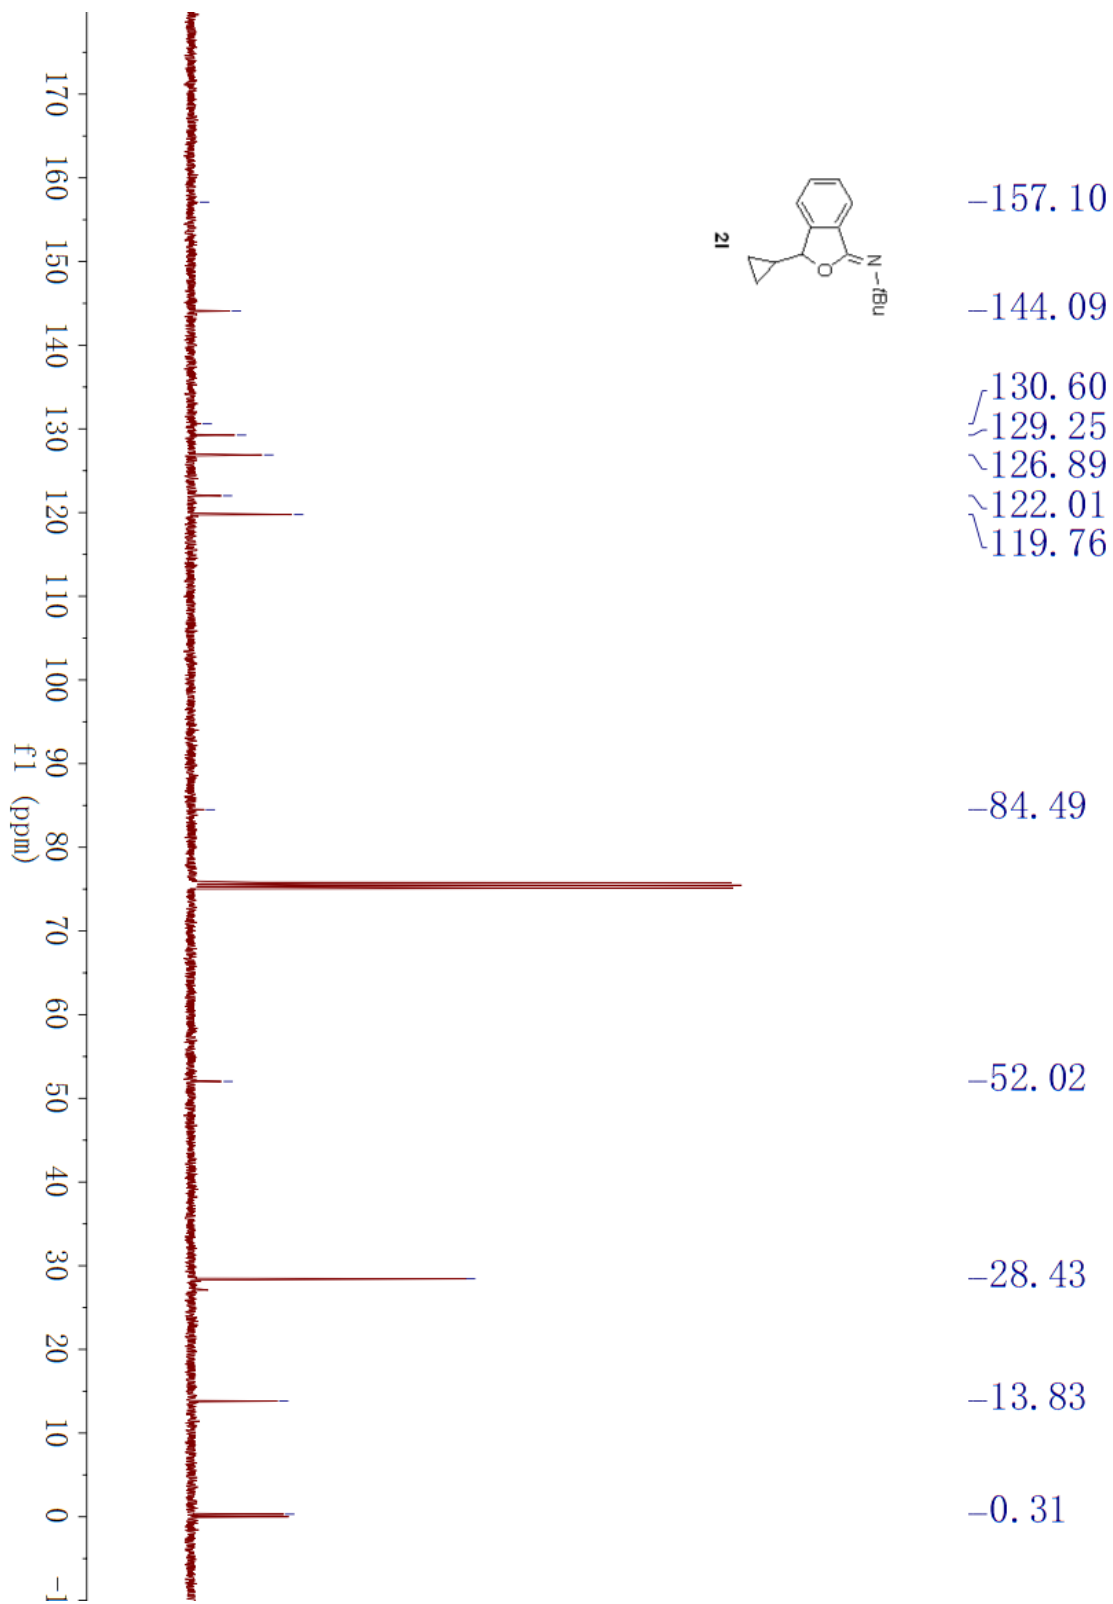

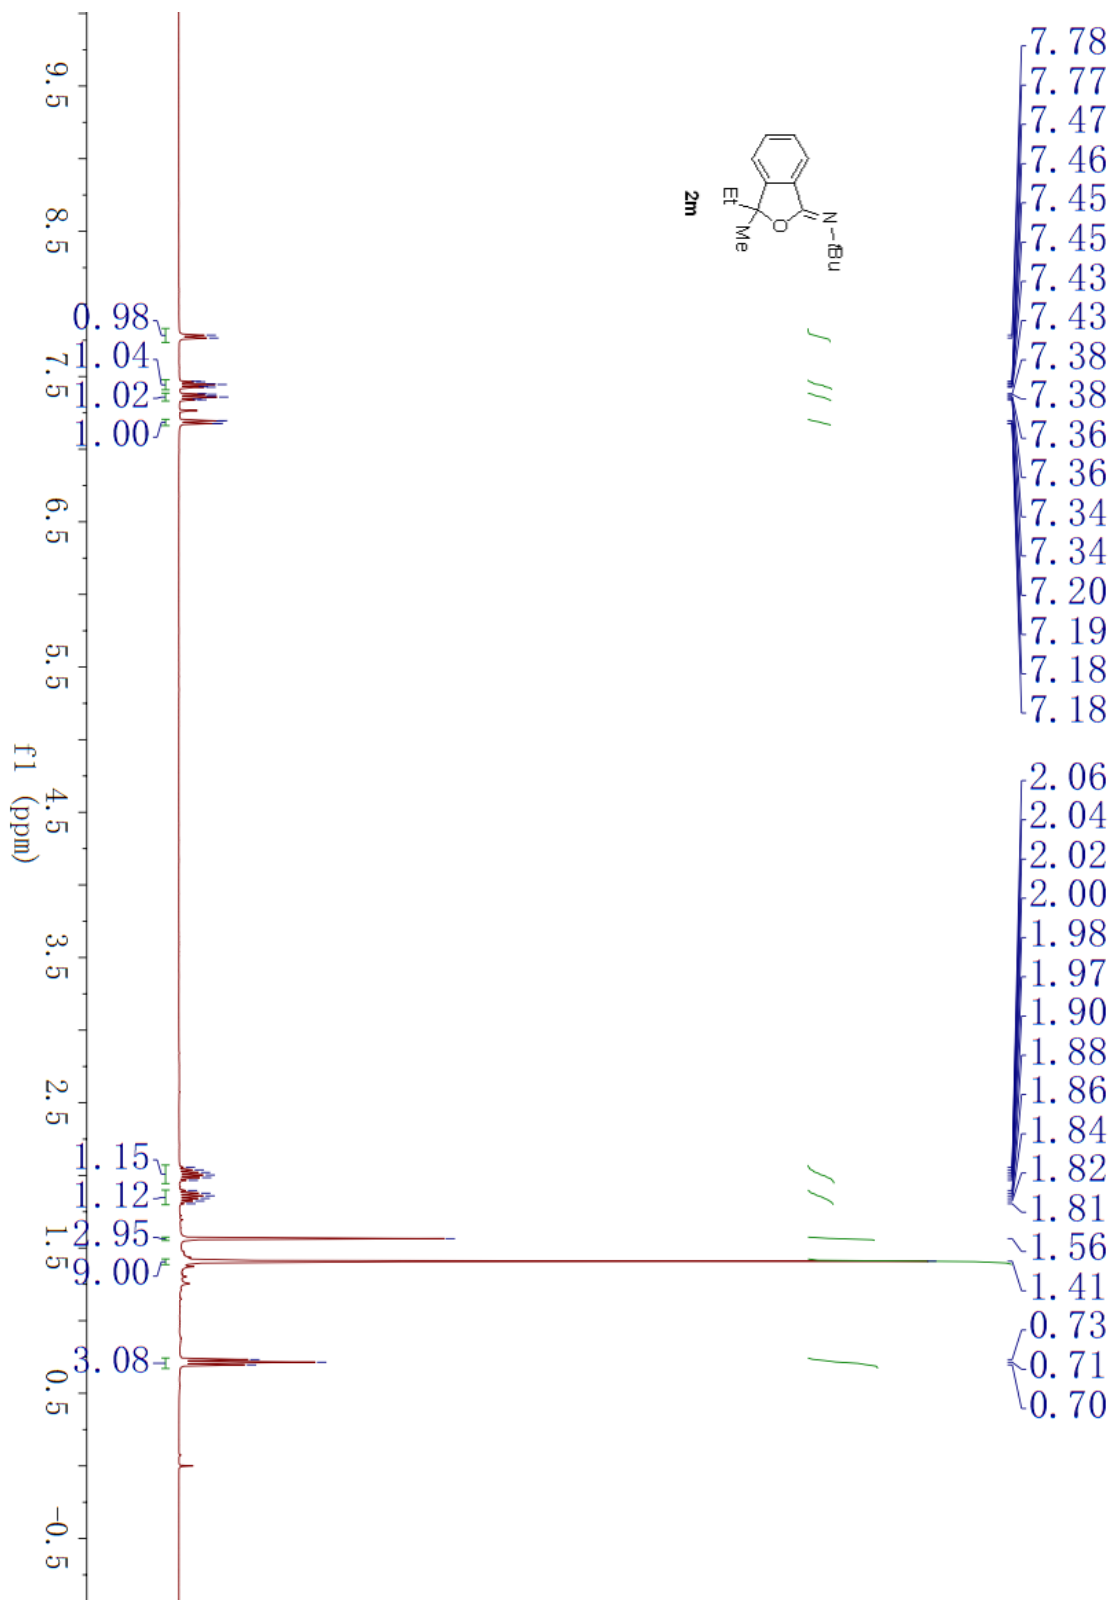

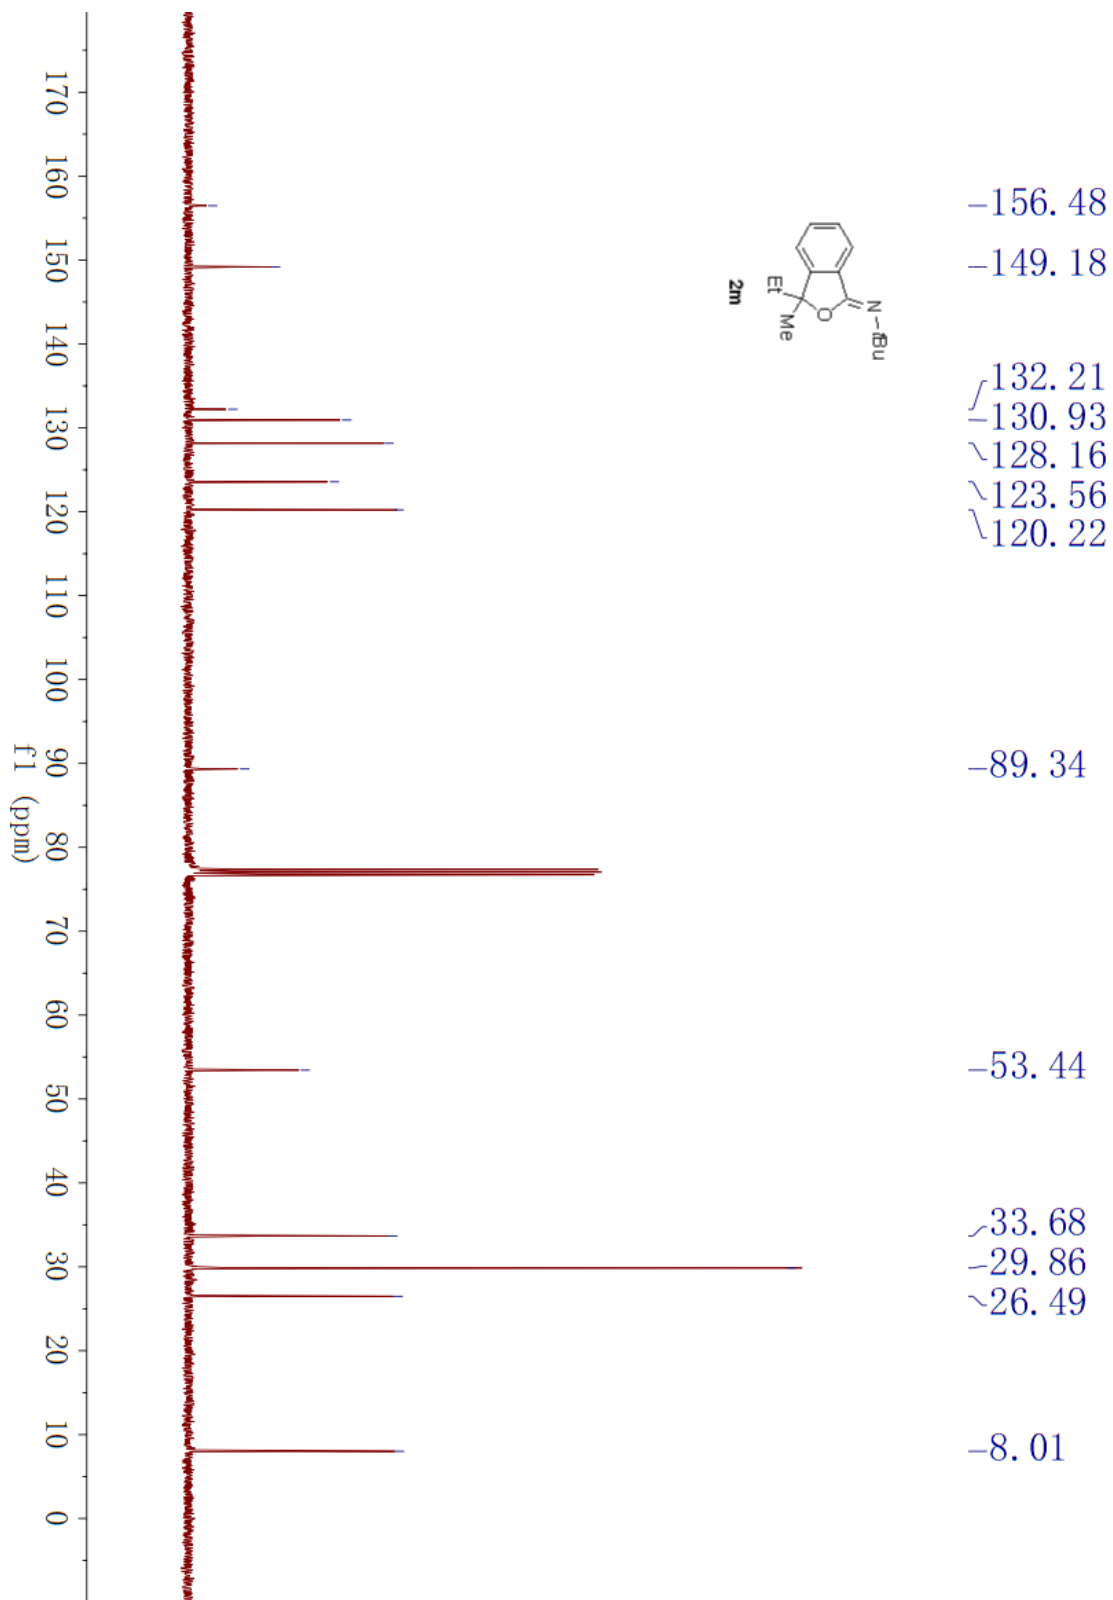

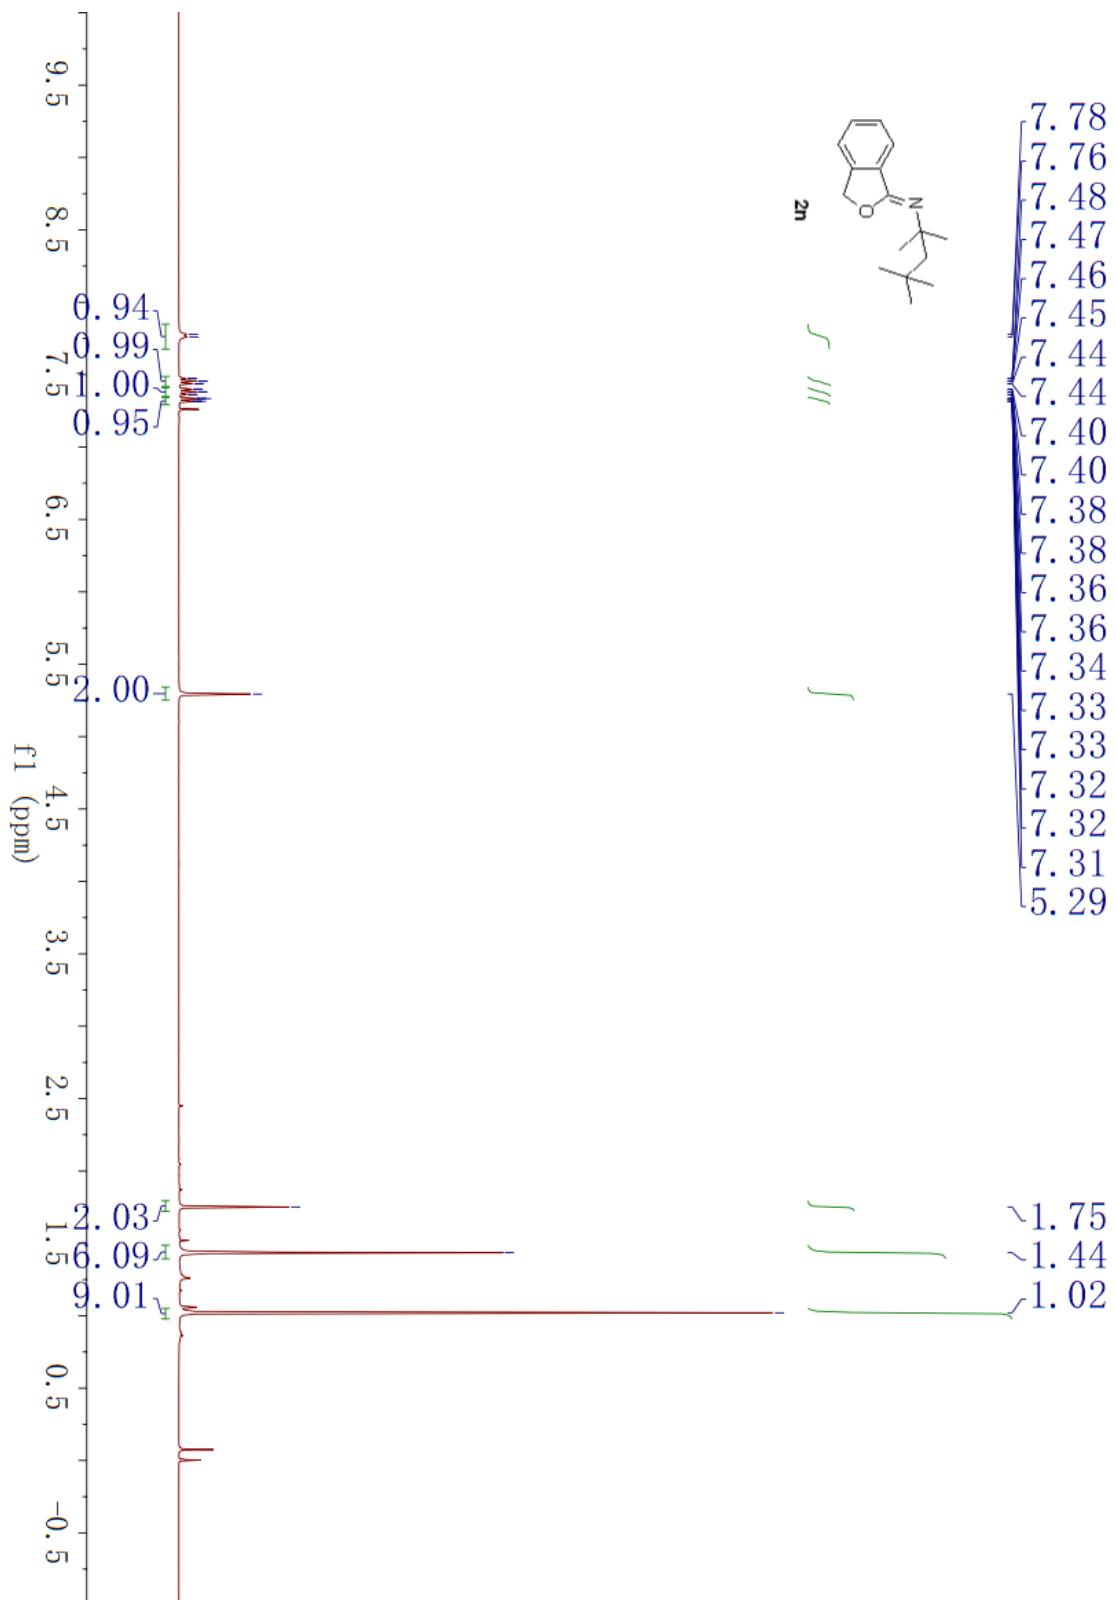

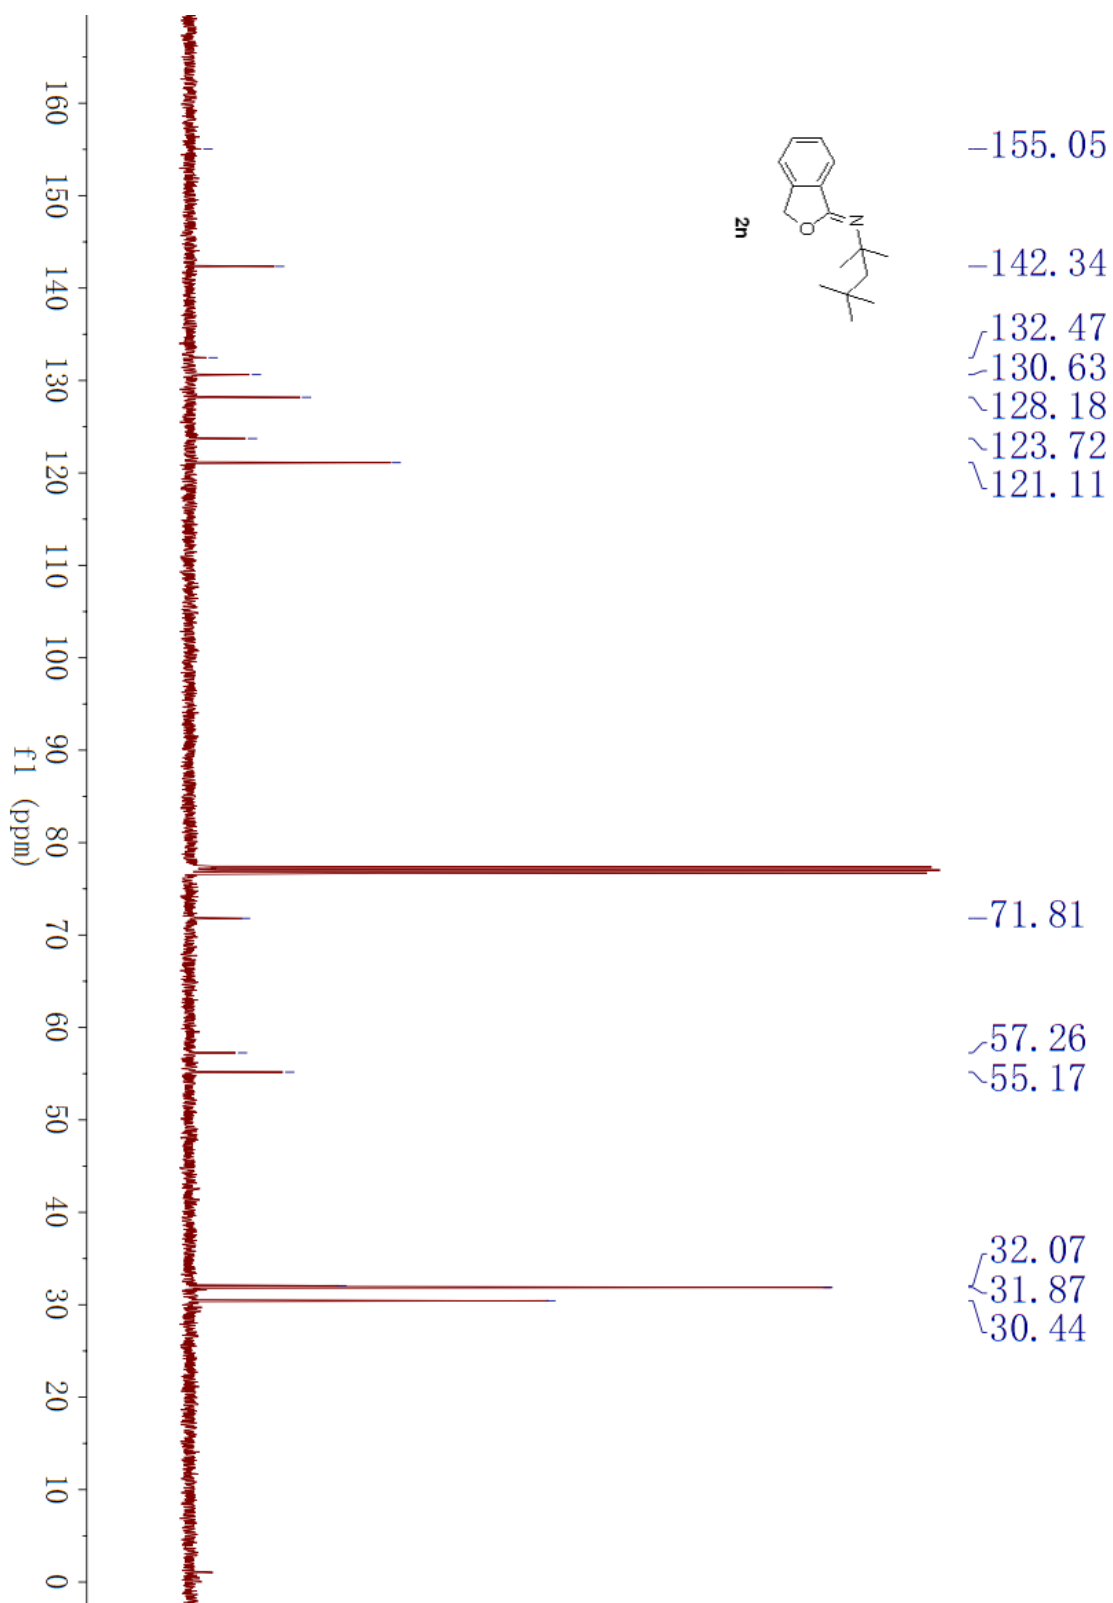

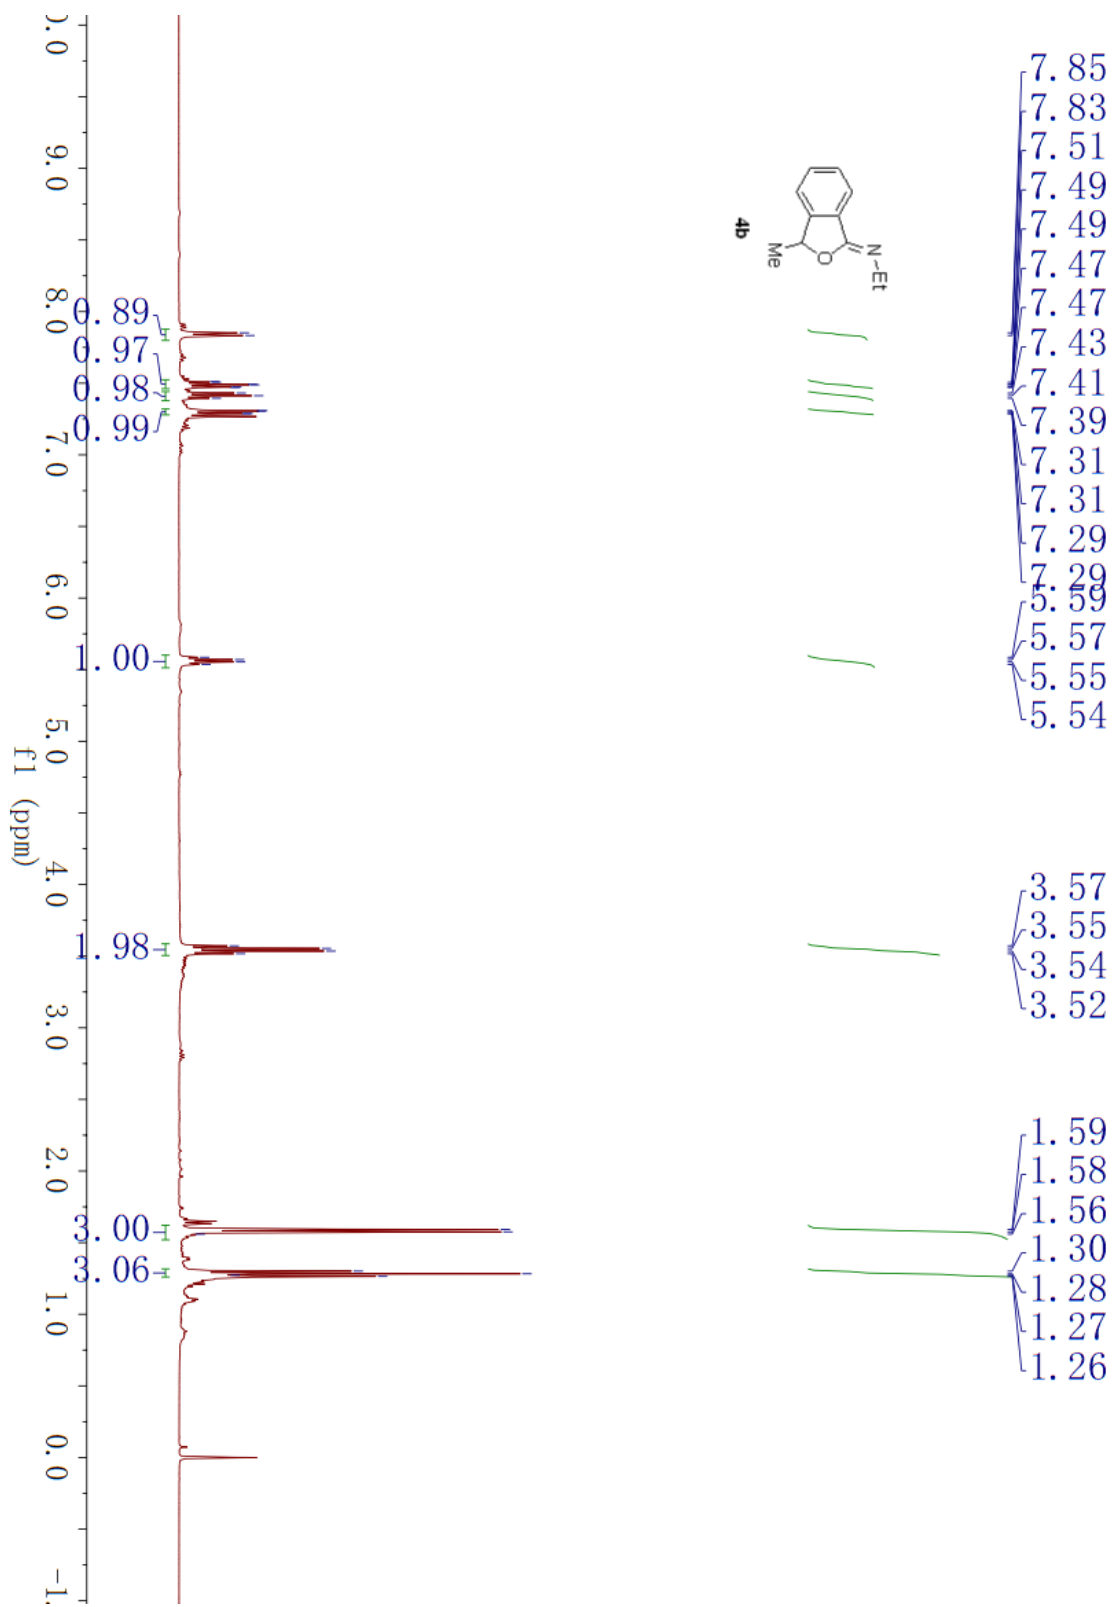

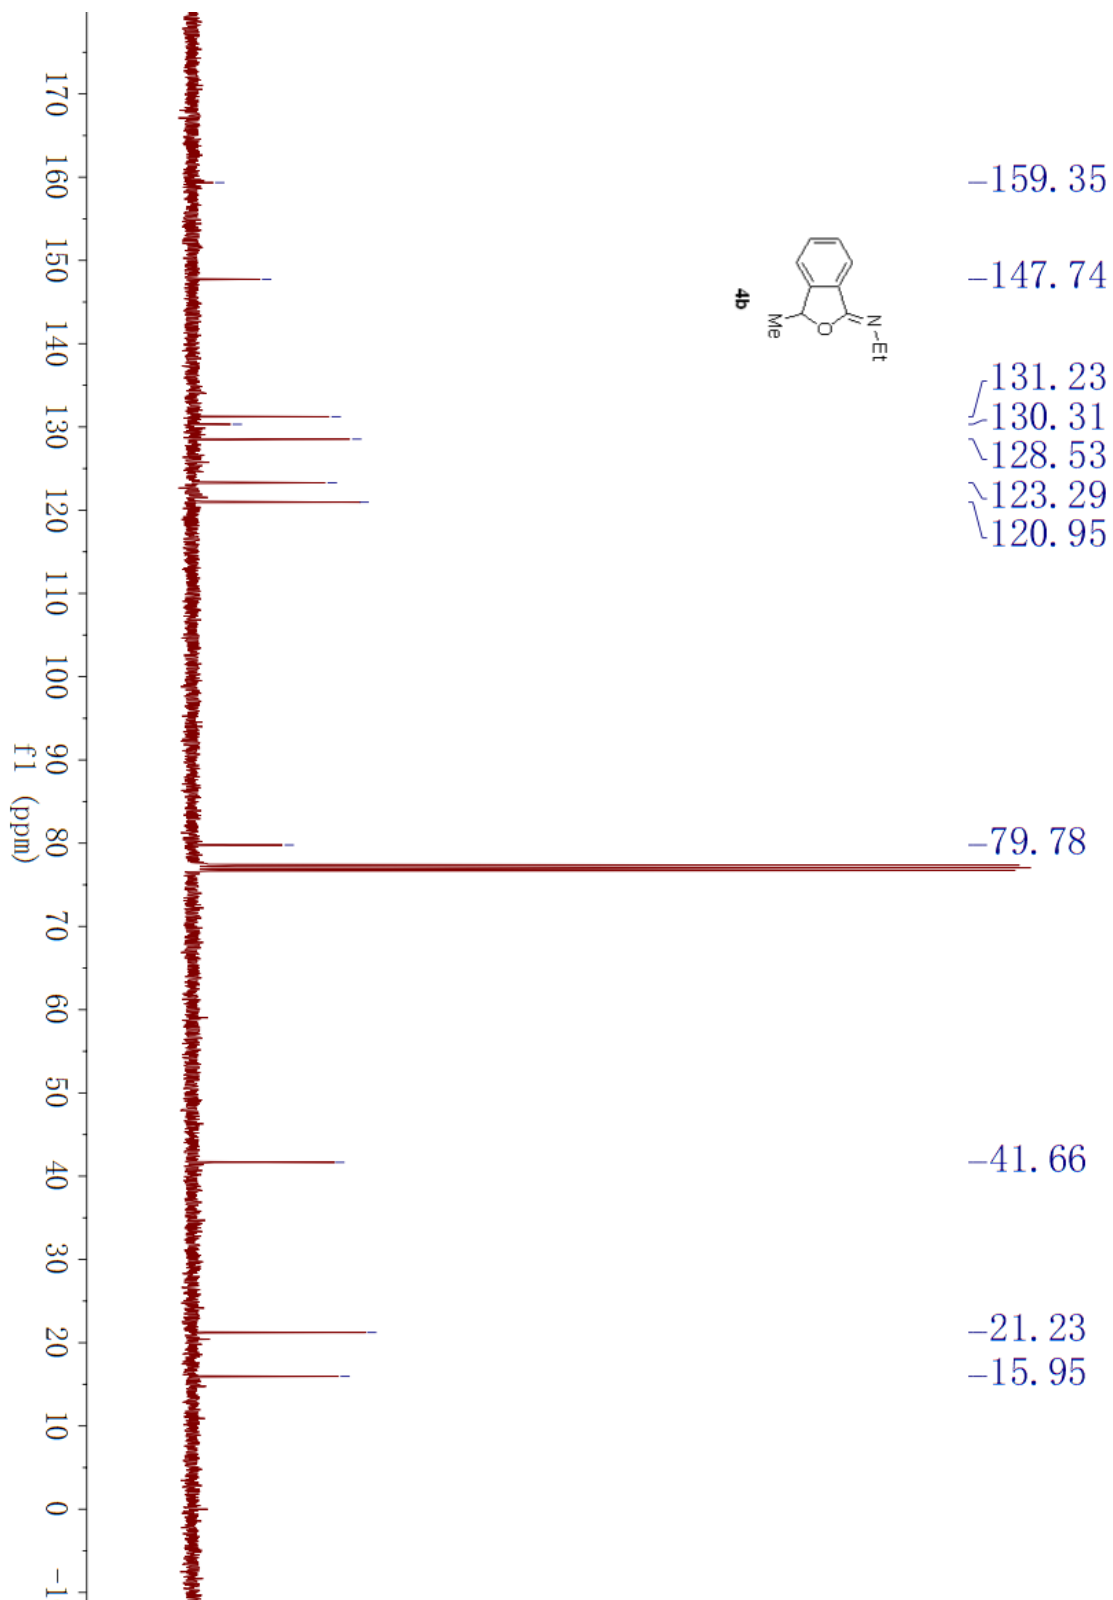

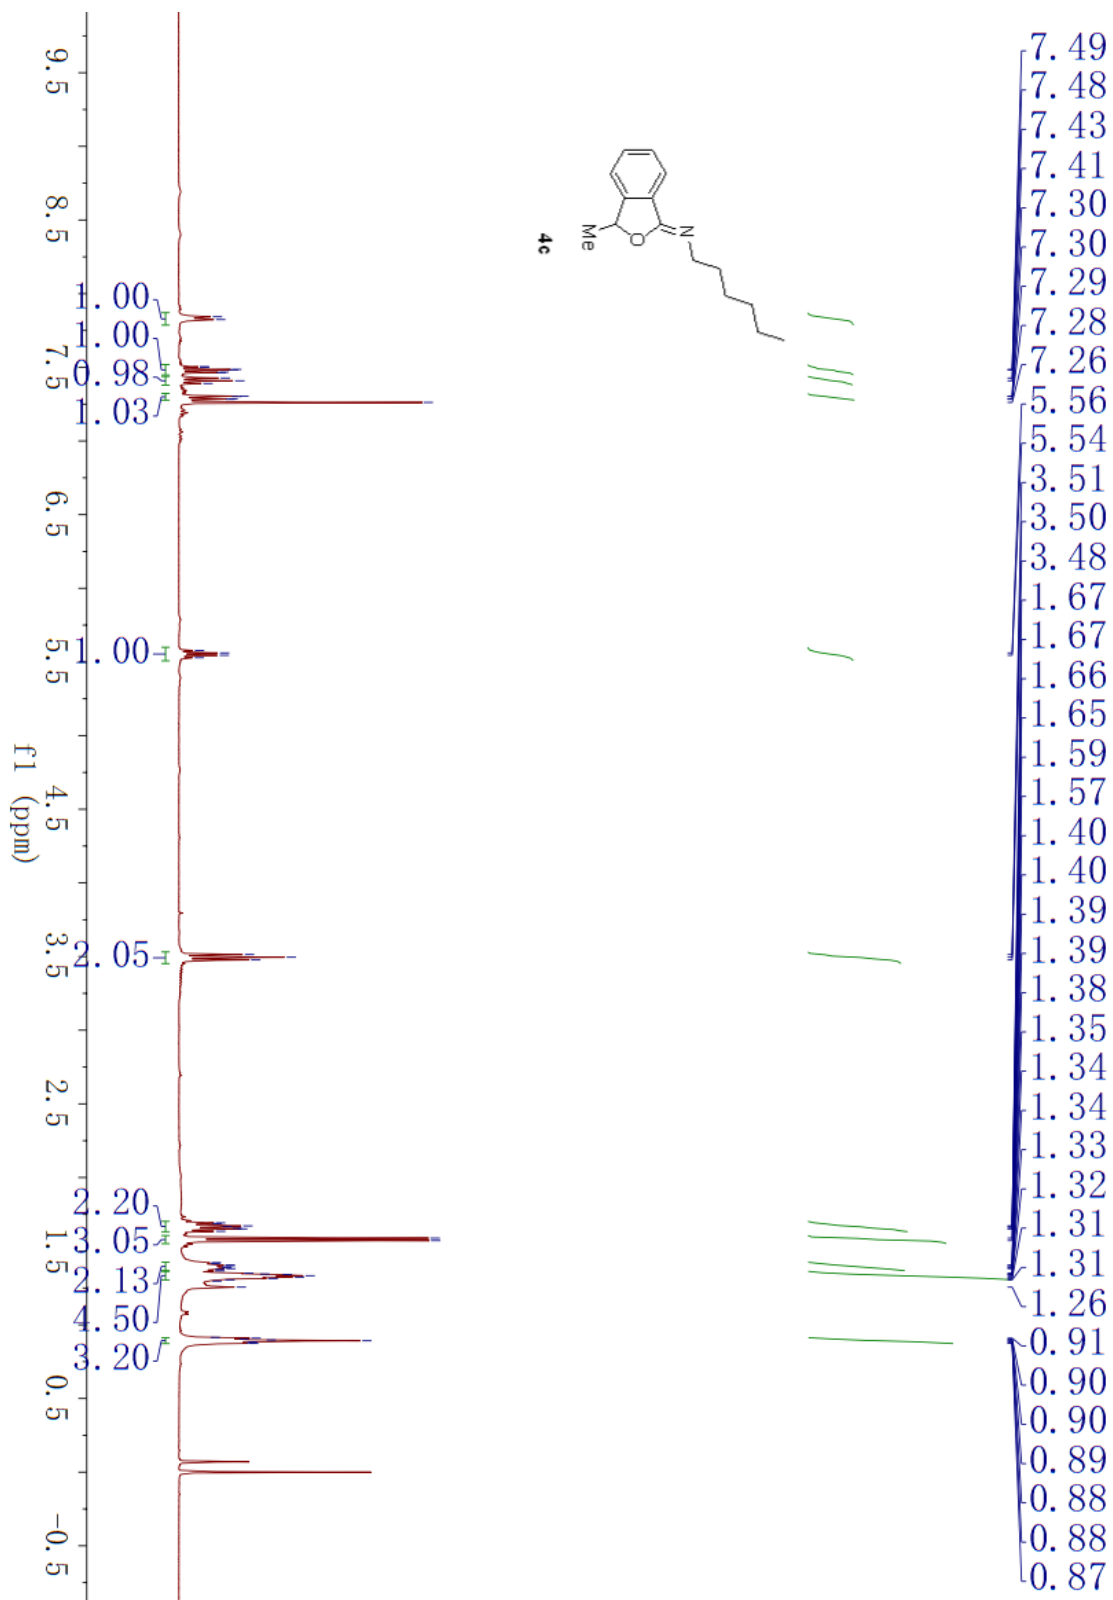



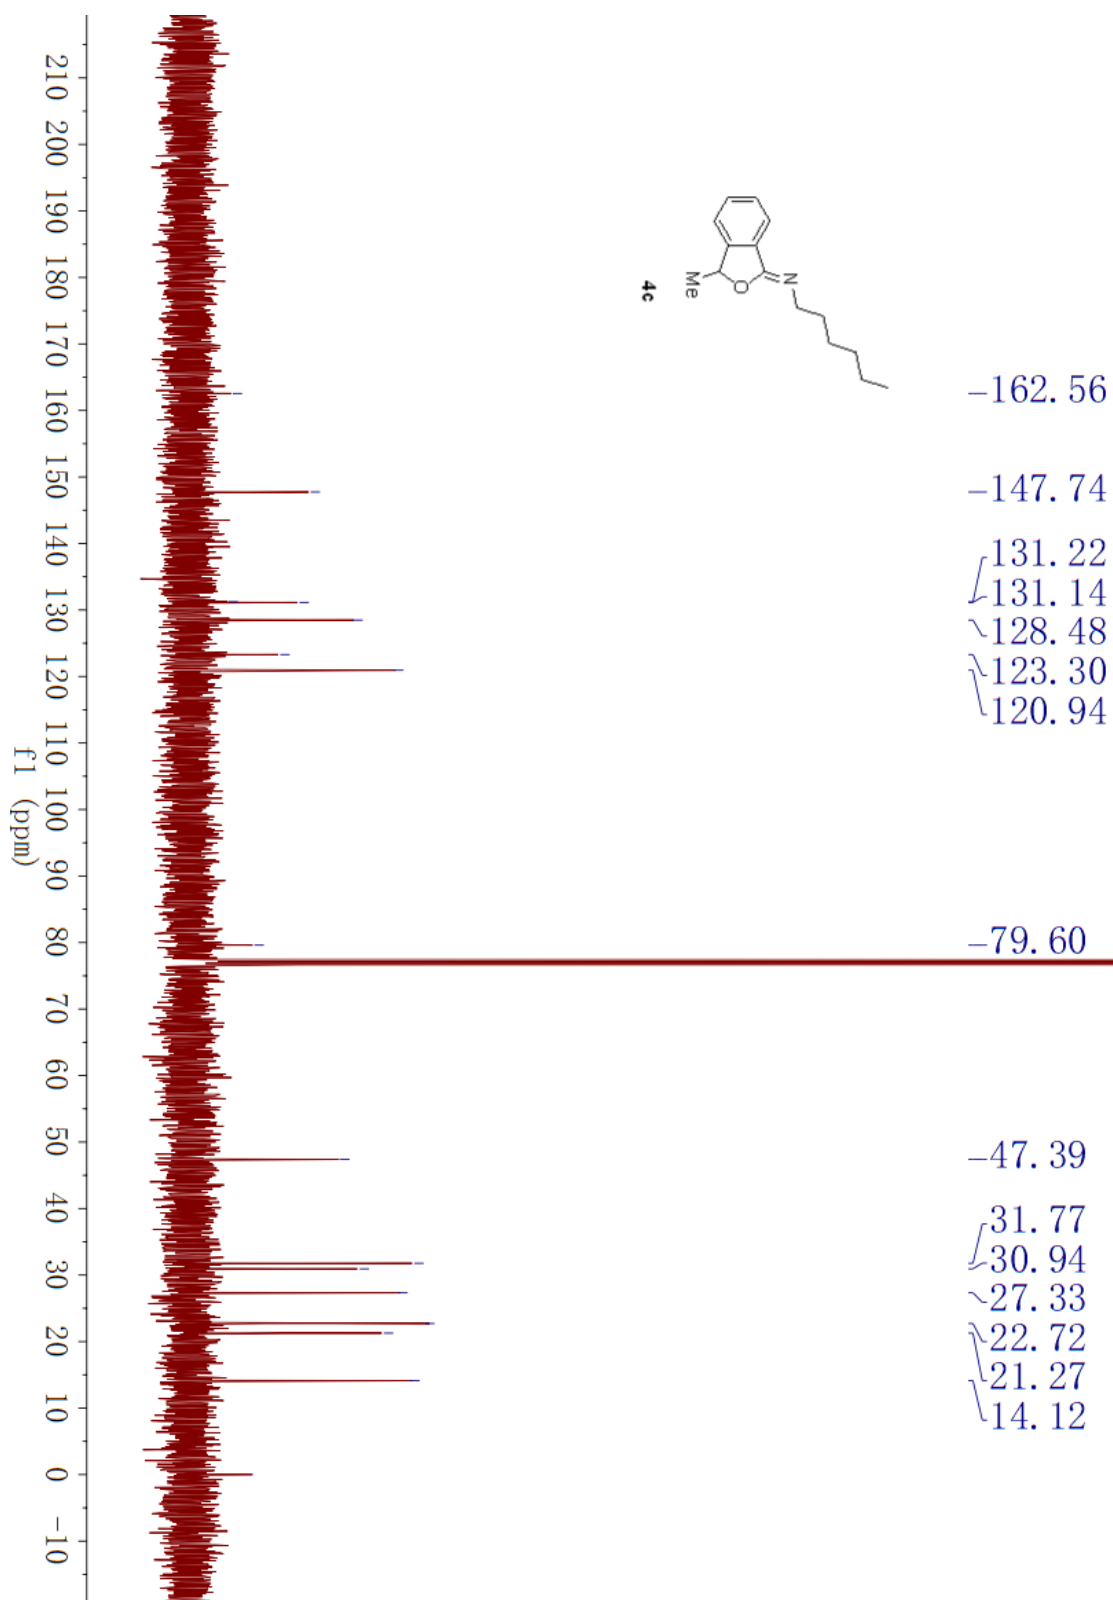

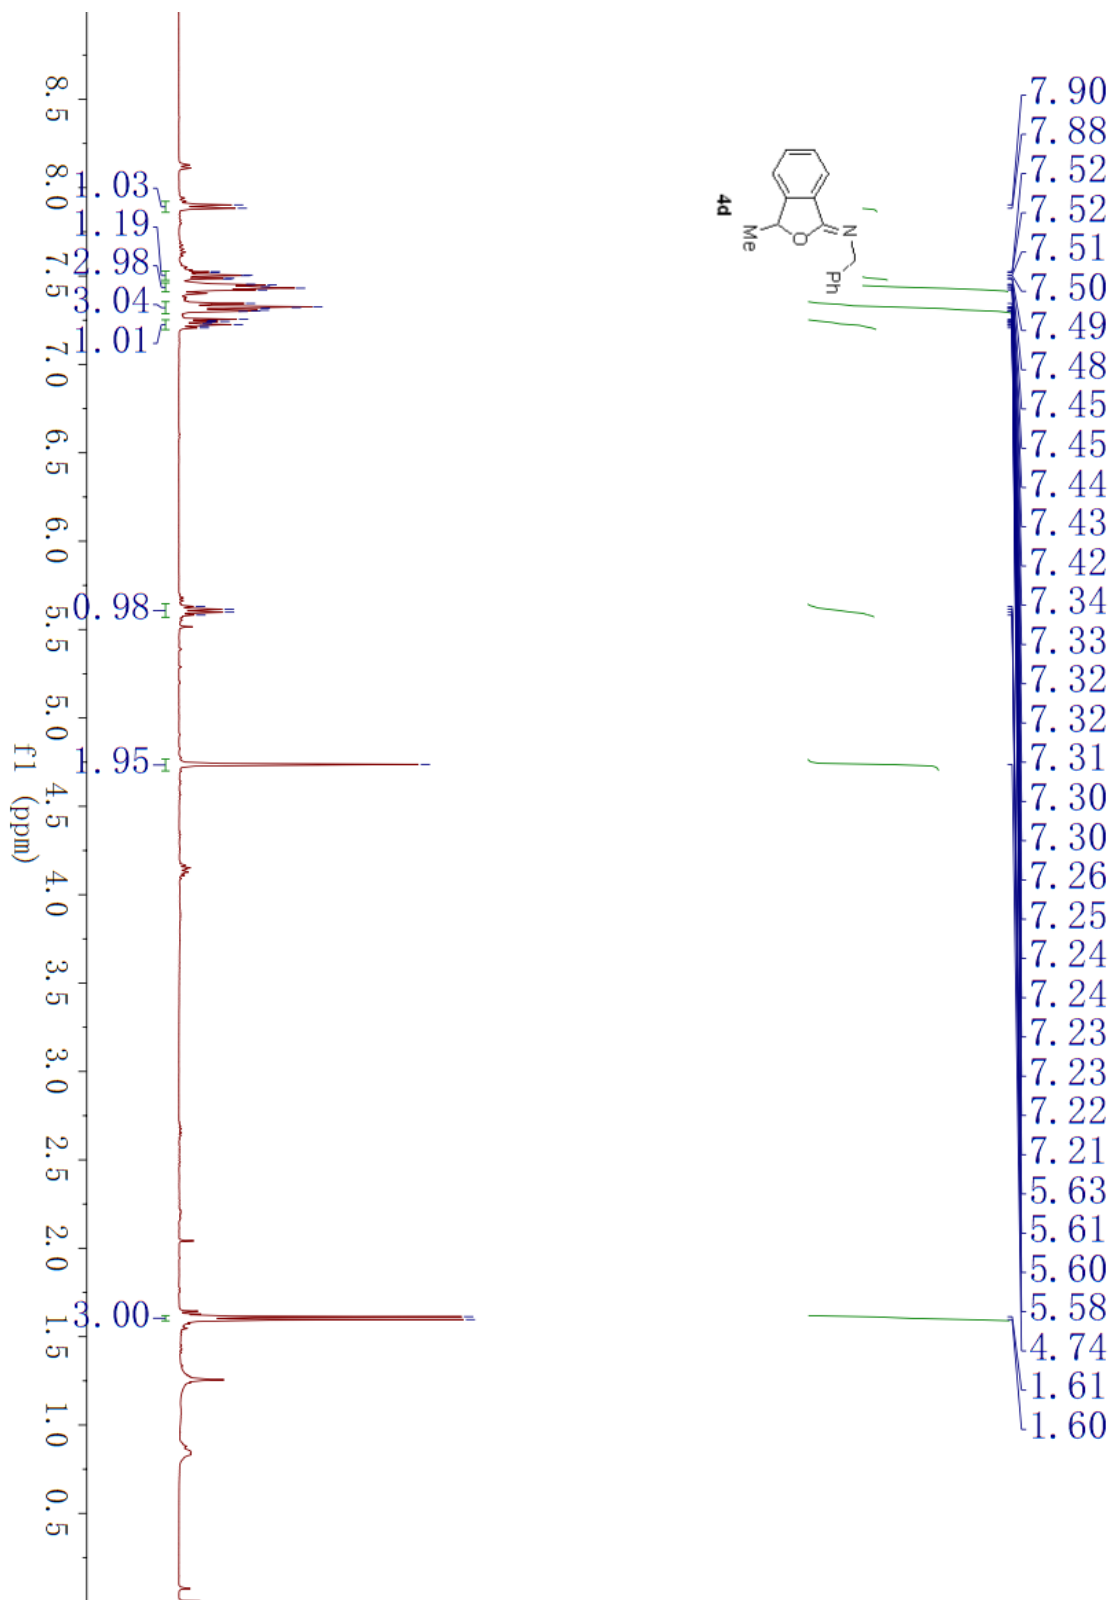

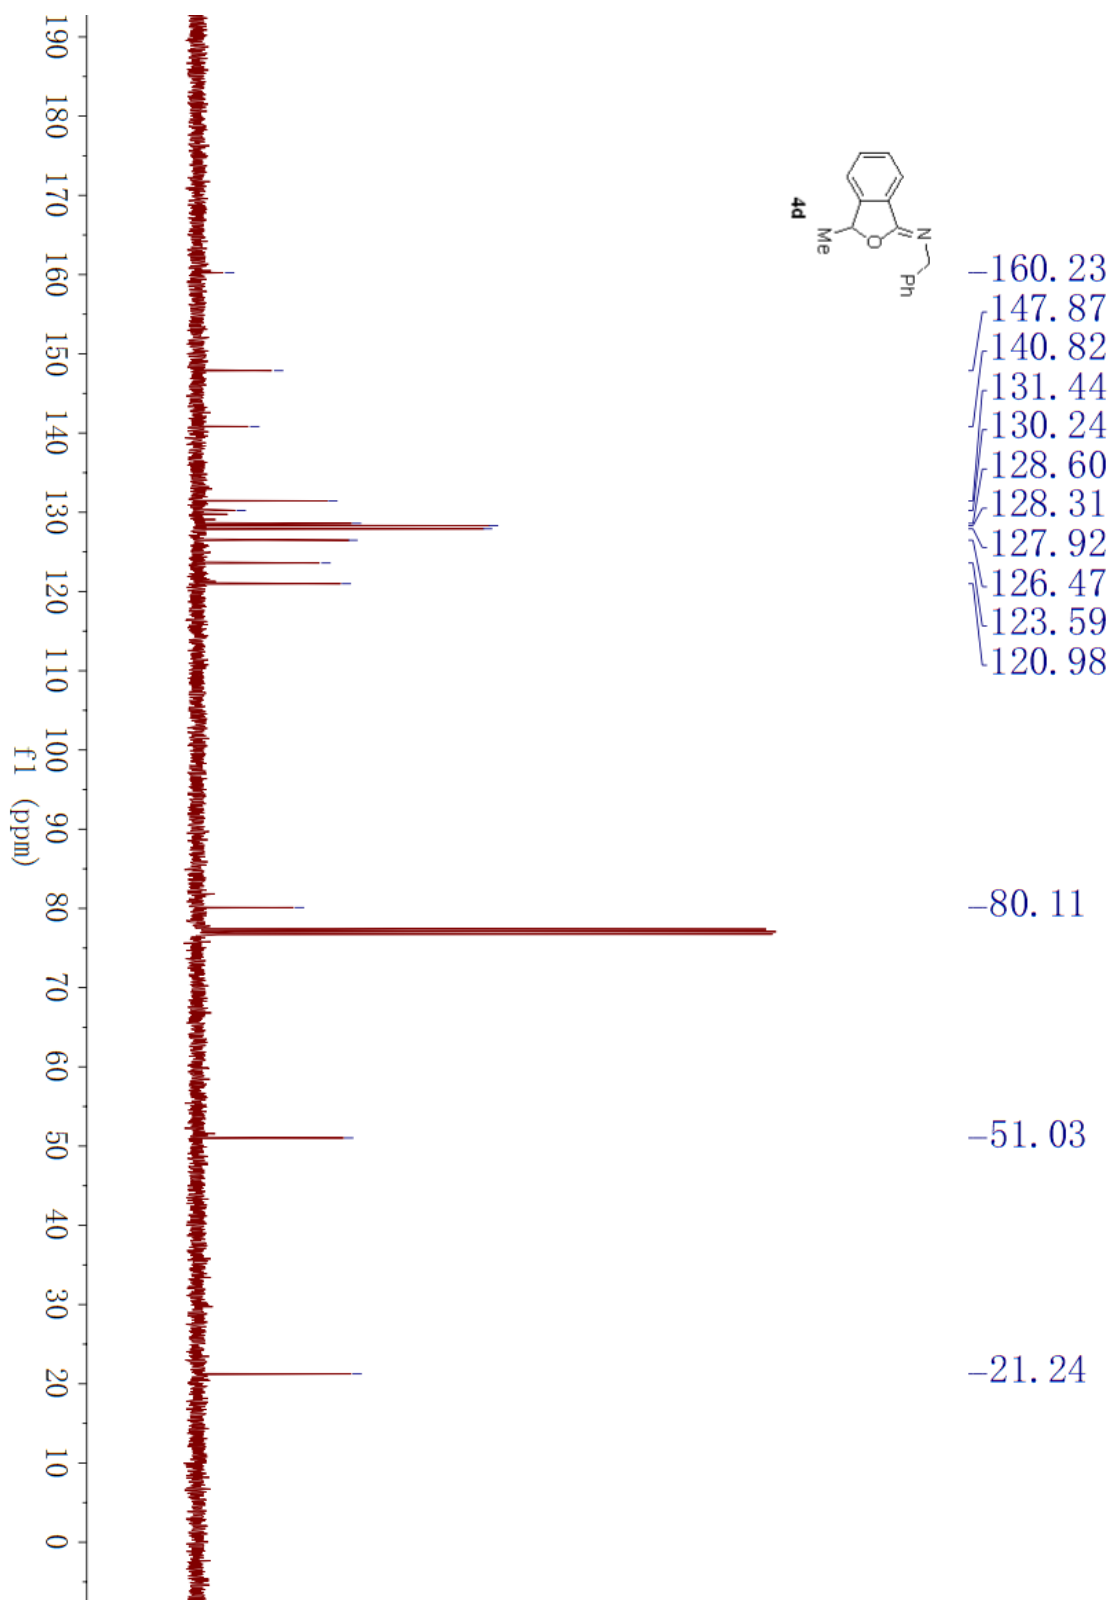

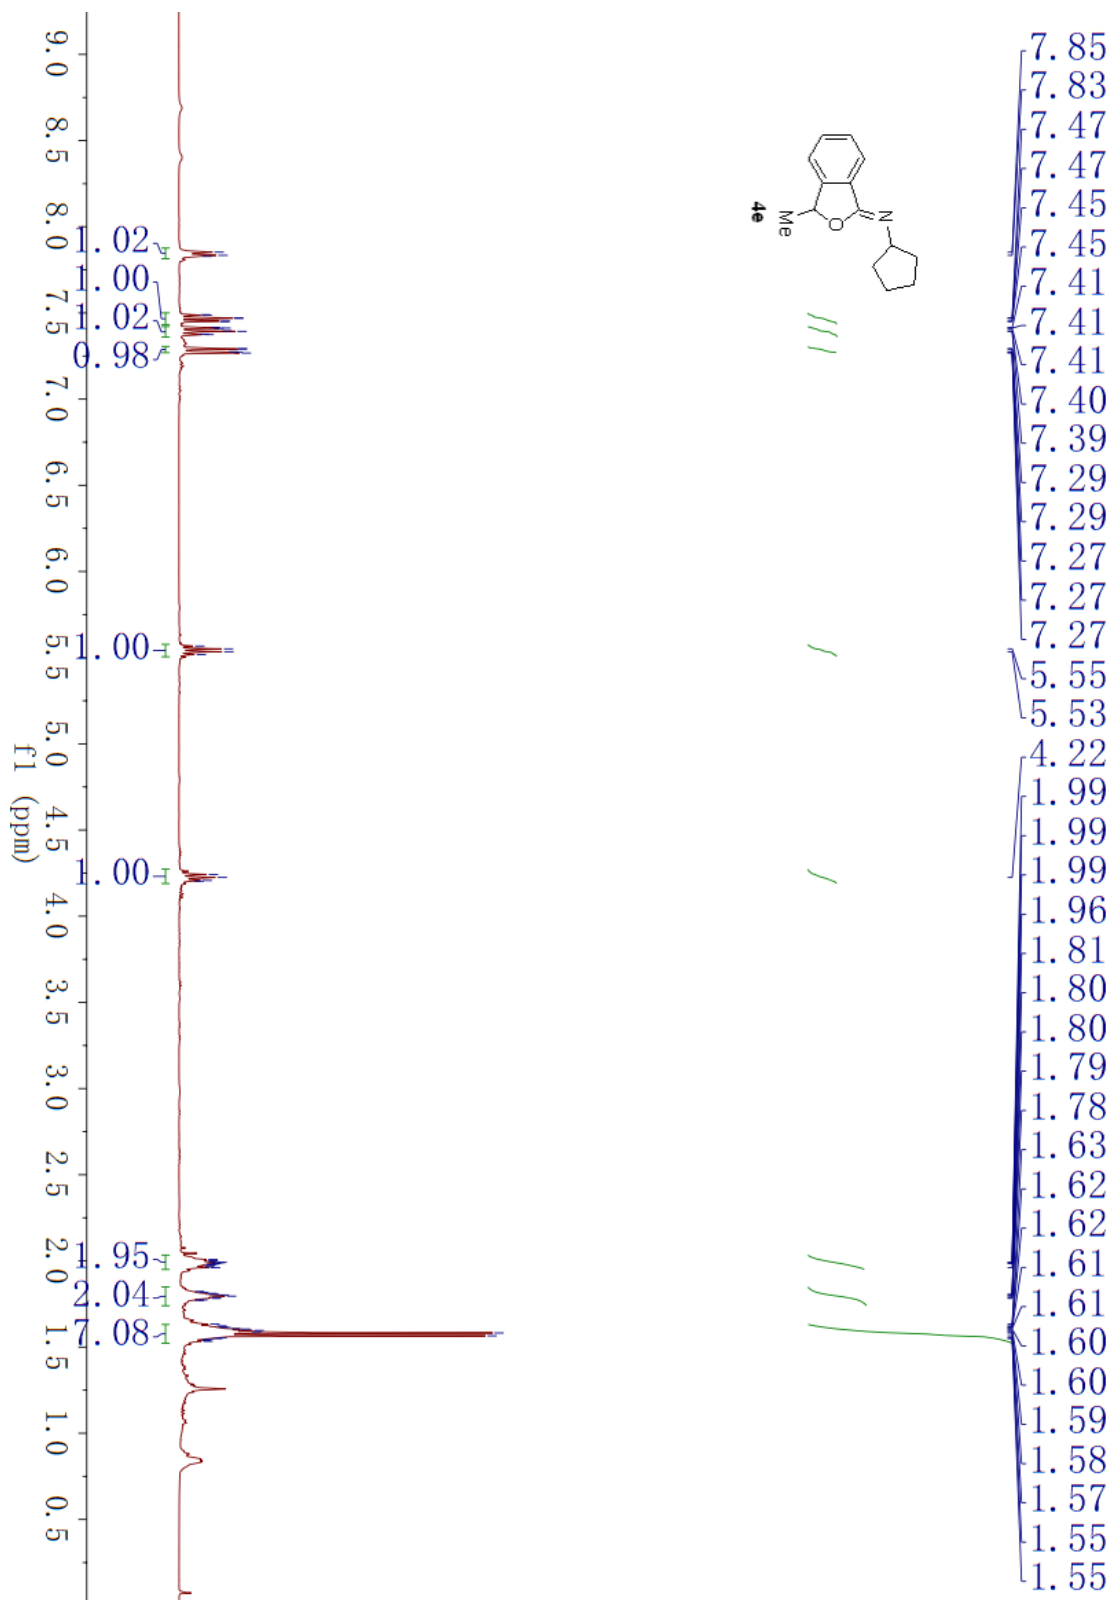

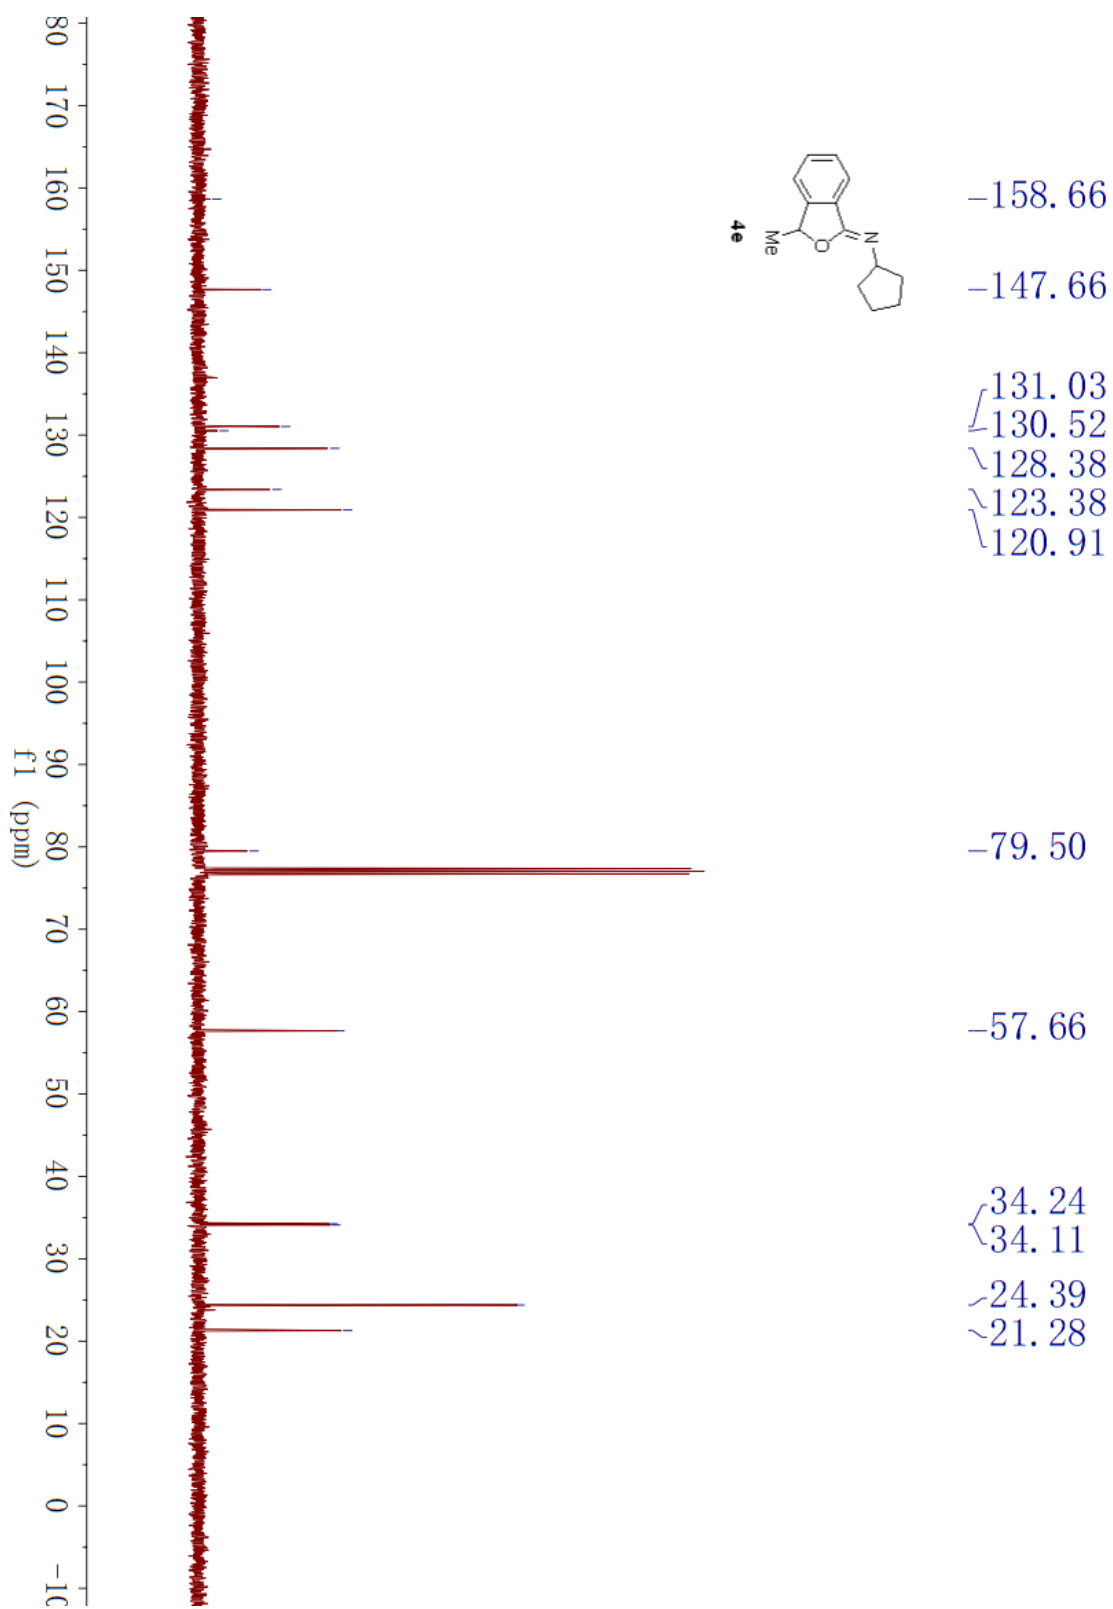

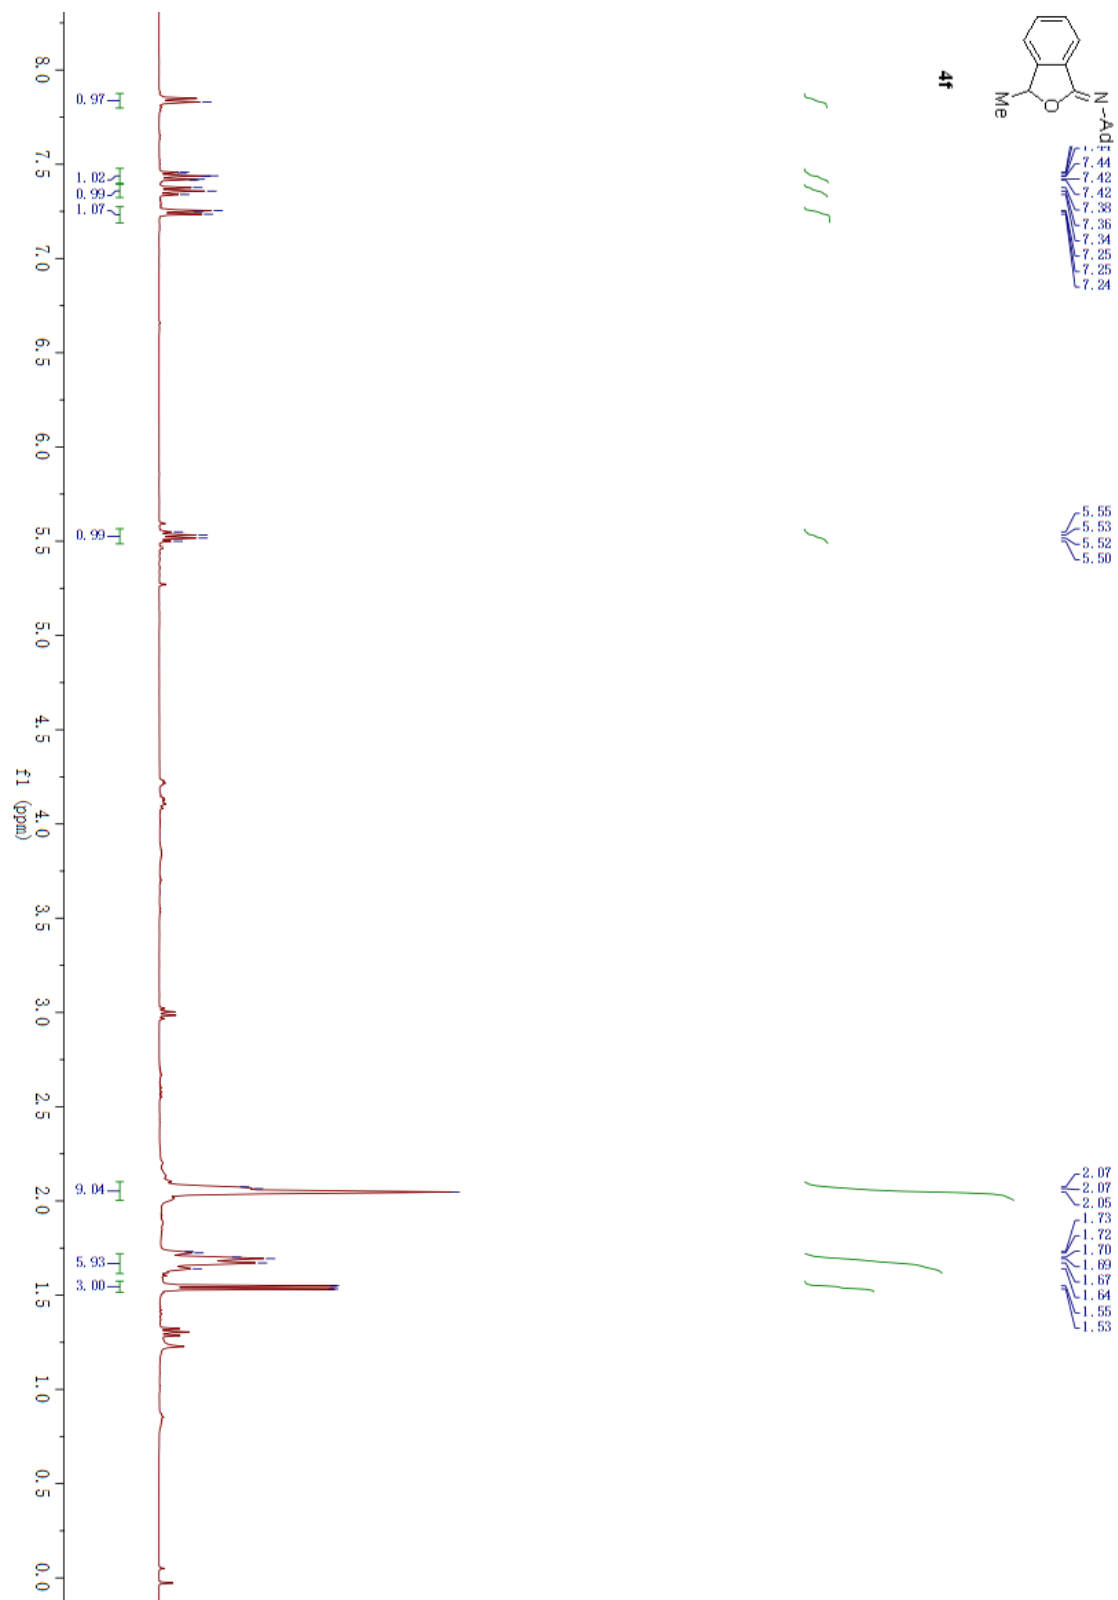

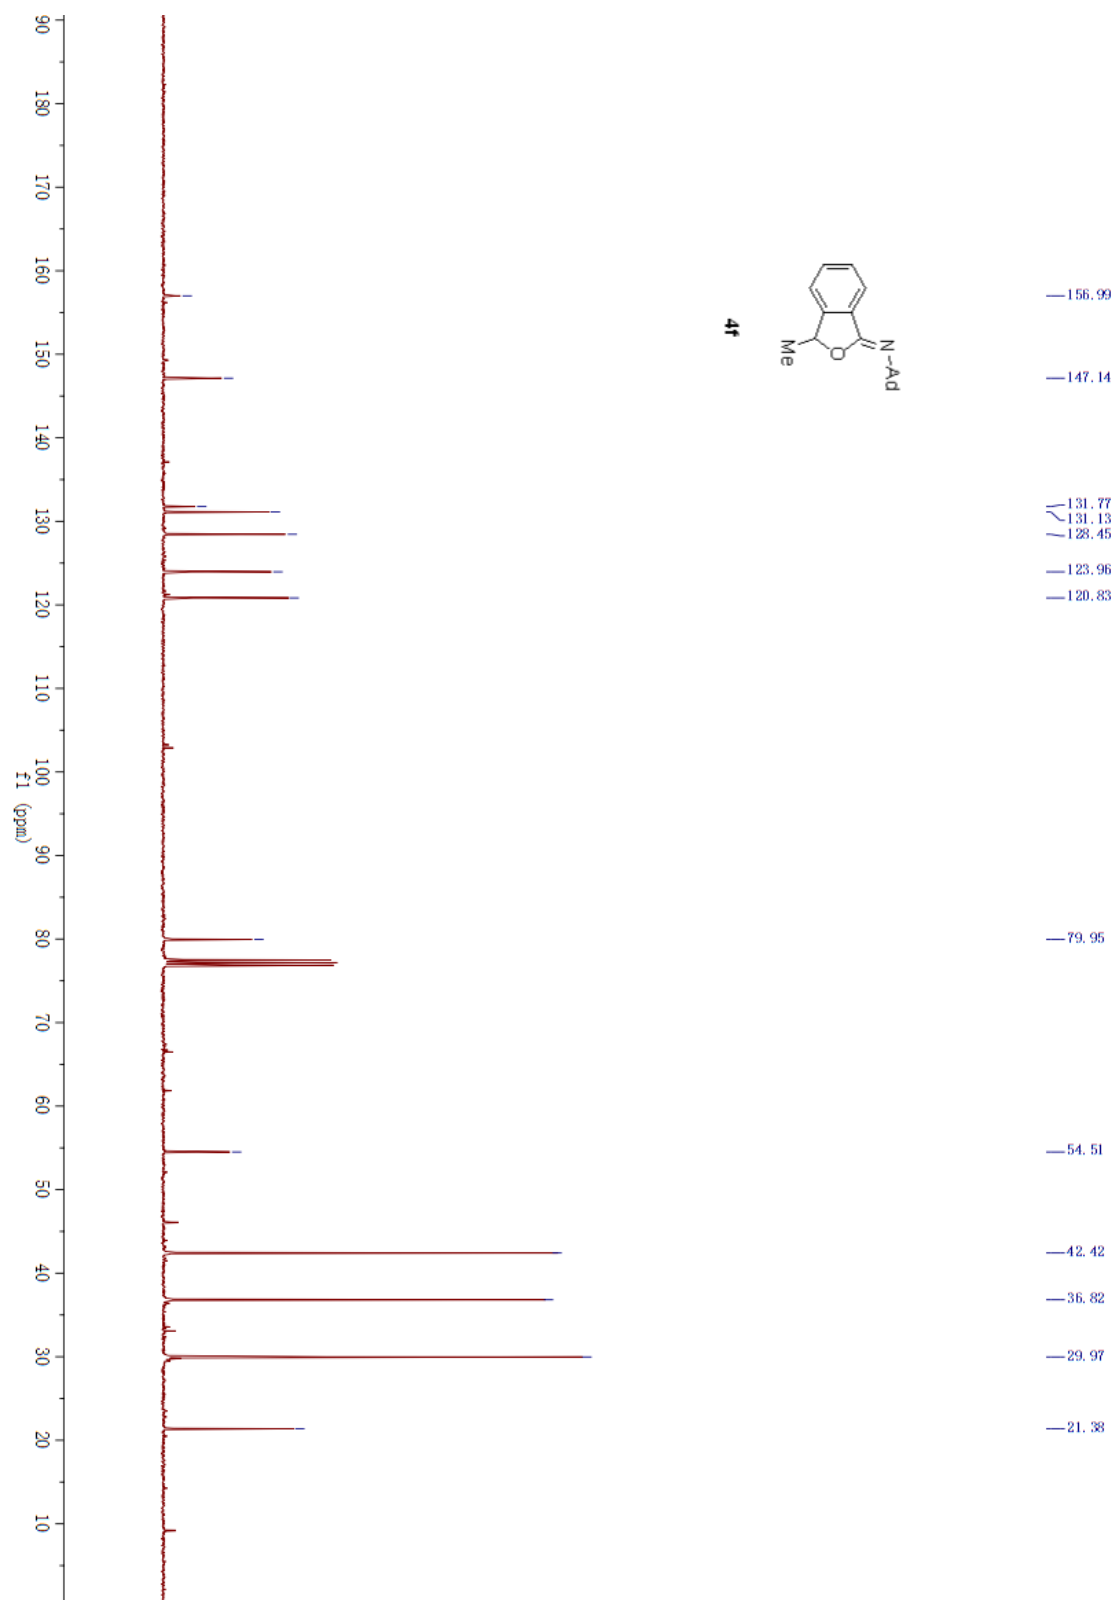

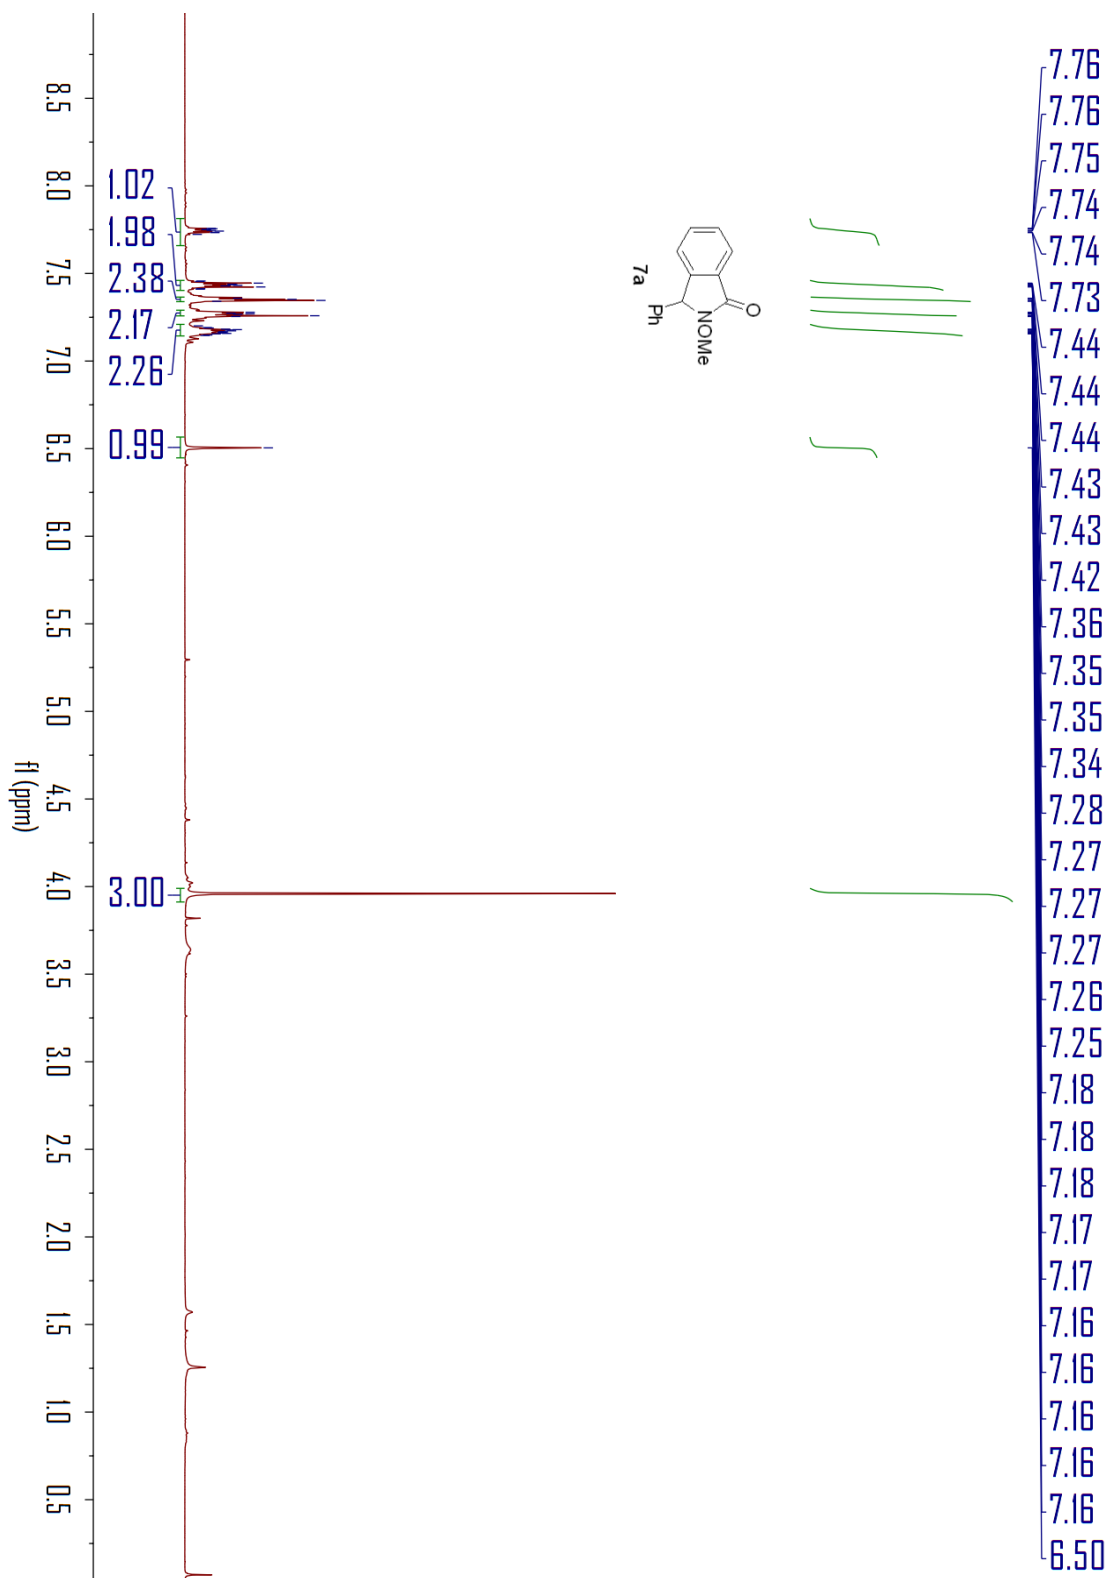



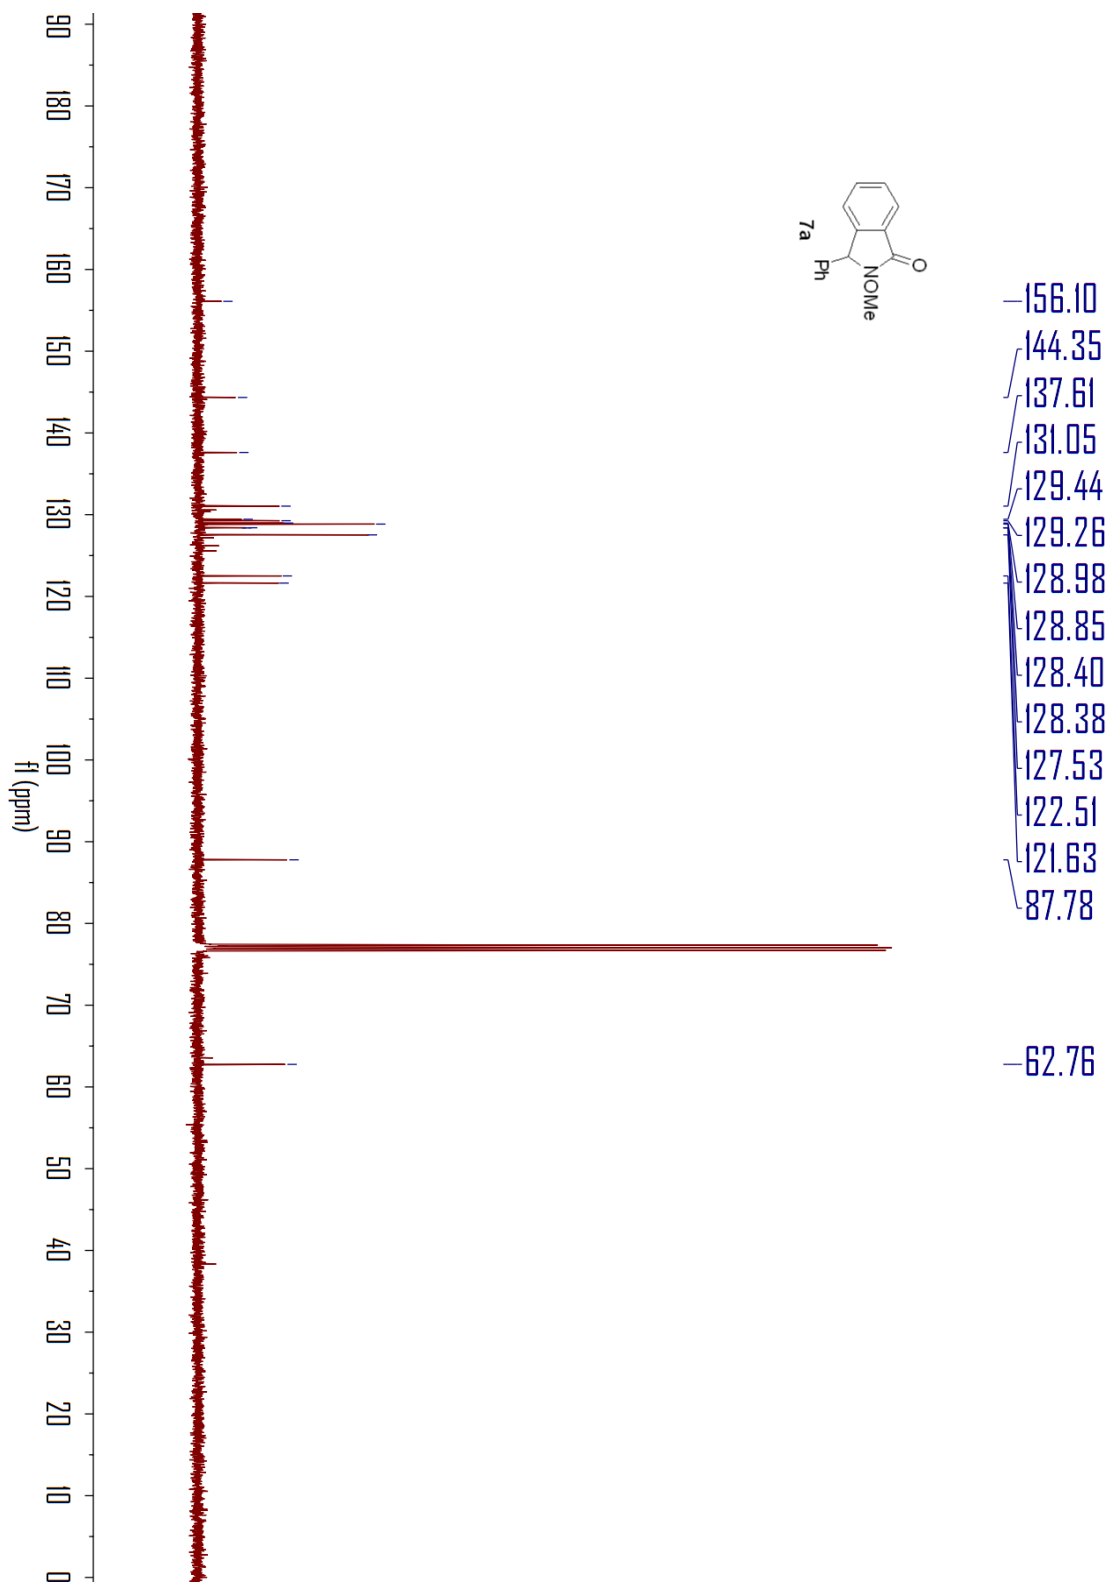

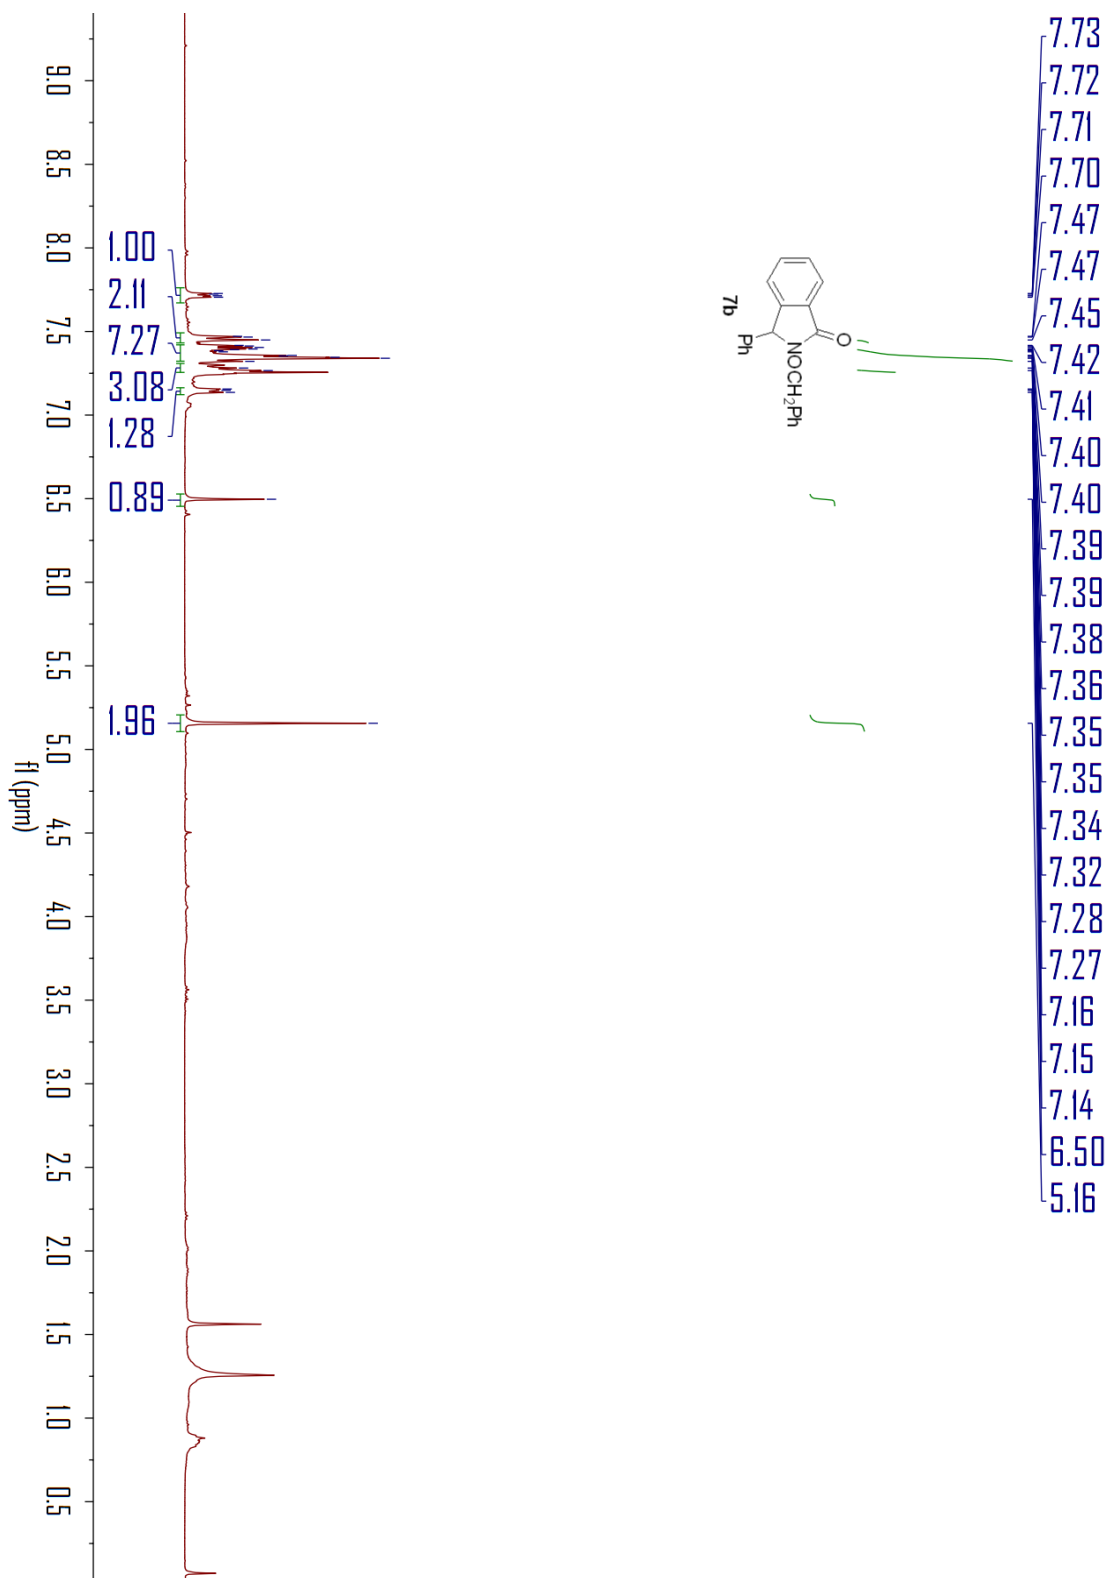

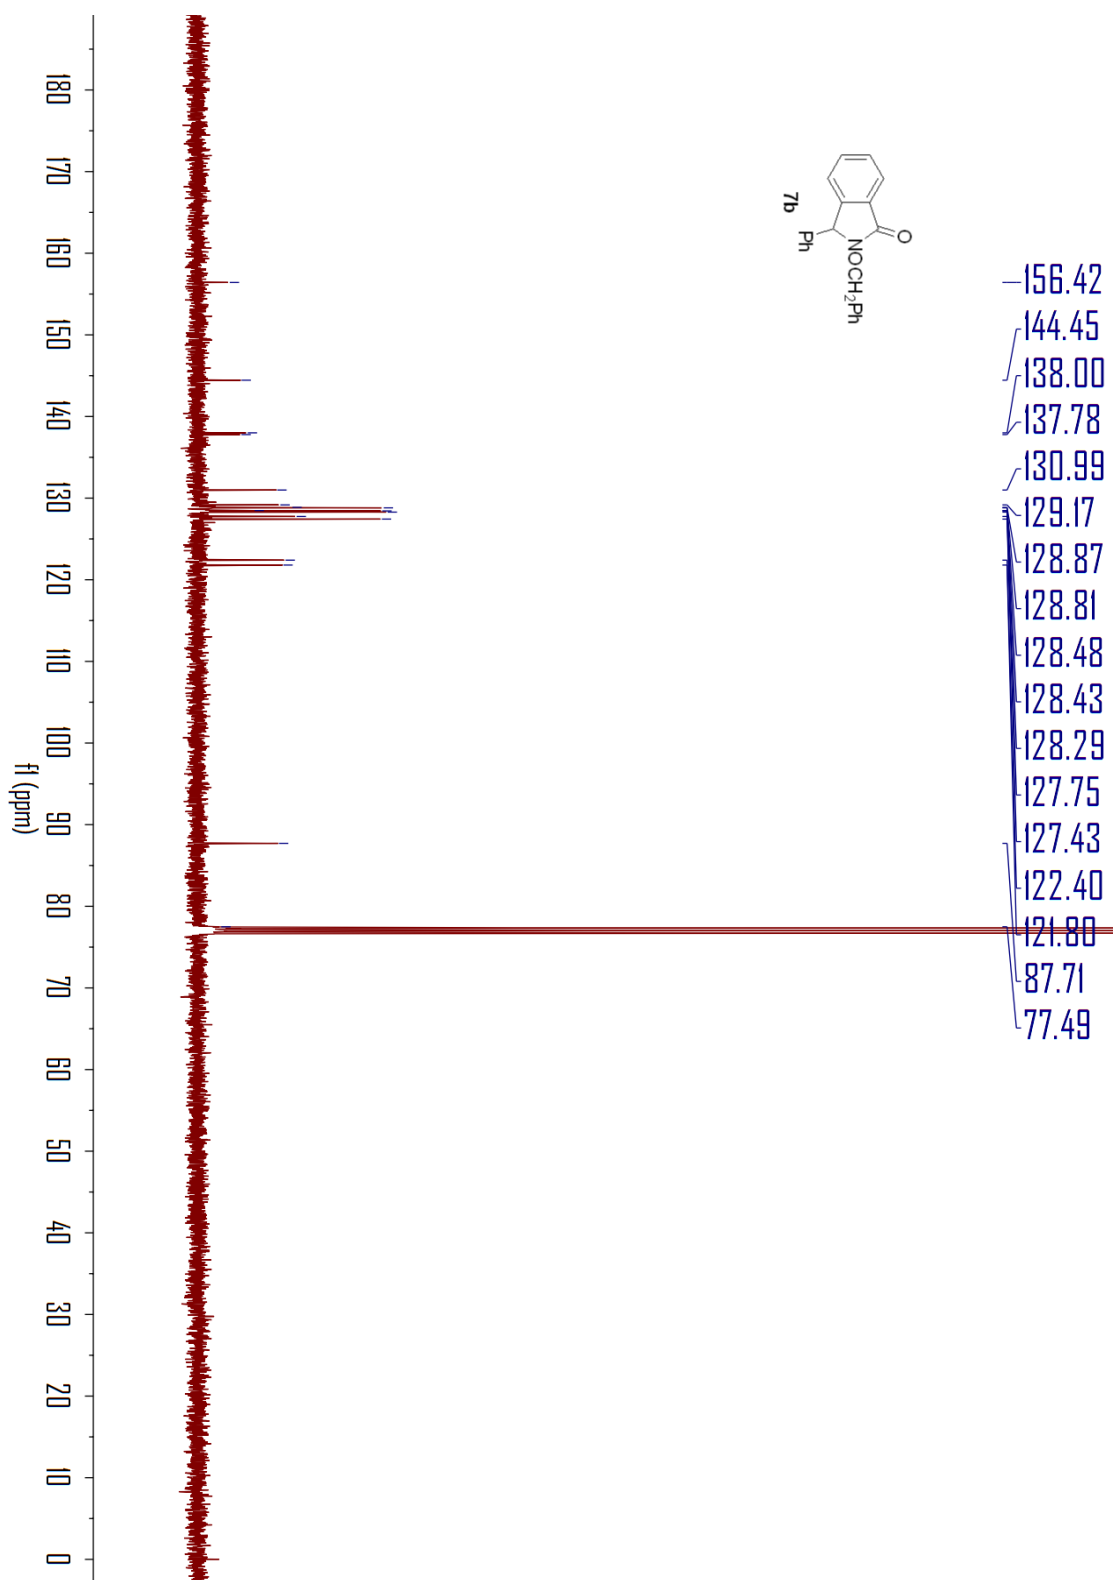

Supplement: d2ob01711c1.pdf [file d2ob01711c1.pdf]
